# Supplementary material for: Characterisation of the rural indigent population in Burkina Faso: a screening tool for setting priority healthcare services in sub-Saharan Africa
Source: PubMed Central journal article supplement — BMJ Open. 2017 Oct 8;7(10):e013405. doi: 10.1136/bmjopen-2016-013405 (PMC5640067; doi:10.1136/bmjopen-2016-013405), 2017-10-08
Supplement: bmjopen-2016-013405.draft_revisions.pdf [file bmjopen-2016-013405.draft_revisions.pdf]

# BMJ Open

## In Sub-Saharan African countries, priority health services should be expanded to unmarried middle aged and older adults: example from Burkina Faso

|                                 |                                                                                                                                                                                                                                                                                                                                                                                                                                                                                                                                                                                                                                                                                                                                                                    |
|---------------------------------|--------------------------------------------------------------------------------------------------------------------------------------------------------------------------------------------------------------------------------------------------------------------------------------------------------------------------------------------------------------------------------------------------------------------------------------------------------------------------------------------------------------------------------------------------------------------------------------------------------------------------------------------------------------------------------------------------------------------------------------------------------------------|
| Journal:                        | <i>BMJ Open</i>                                                                                                                                                                                                                                                                                                                                                                                                                                                                                                                                                                                                                                                                                                                                                    |
| Manuscript ID                   | bmjopen-2016-013405                                                                                                                                                                                                                                                                                                                                                                                                                                                                                                                                                                                                                                                                                                                                                |
| Article Type:                   | Research                                                                                                                                                                                                                                                                                                                                                                                                                                                                                                                                                                                                                                                                                                                                                           |
| Date Submitted by the Author:   | 11-Jul-2016                                                                                                                                                                                                                                                                                                                                                                                                                                                                                                                                                                                                                                                                                                                                                        |
| Complete List of Authors:       | Ouédraogo, Samiratou; University of Montréal Public Health Research Institute, Department of Social and Preventive Medicine<br>Ridde, Valéry; University of Montréal Public Health Research Institute, Department of Social and Preventive Medicine<br>Atchessi, Nicole; University of Montréal Public Health Research Institute, Department of Social and Preventive Medicine<br>Souares, Aurélia; University of Heidelberg, Institute of Public Health<br>Koulidiati, Jean-Louis; University of Heidelberg, Institute of Public Health<br>Stoeffler, Quentin; University of California, Agricultural and Resource Economics<br>Zunzunegui, Maria-Victoria; University of Montréal Public Health Research Institute, Department of Social and Preventive Medicine |
| <b>Primary Subject Heading</b>: | Global health                                                                                                                                                                                                                                                                                                                                                                                                                                                                                                                                                                                                                                                                                                                                                      |
| Secondary Subject Heading:      | Health services research, Public health, Research methods, Epidemiology                                                                                                                                                                                                                                                                                                                                                                                                                                                                                                                                                                                                                                                                                            |
| Keywords:                       | Indigent, social vulnerability, community-based selection, universal health coverage, high-priority health service                                                                                                                                                                                                                                                                                                                                                                                                                                                                                                                                                                                                                                                 |
|                                 |                                                                                                                                                                                                                                                                                                                                                                                                                                                                                                                                                                                                                                                                                                                                                                    |

**RESEARCH ARTICLE**

**Title:** In Sub-Saharan African countries, priority health services should be expanded to unmarried middle aged and older adults: example from Burkina Faso

**Authors:**

Samiratou Ouédraogo<sup>1\*</sup>; Valéry Ridde<sup>1</sup>; Nicole Atchessi<sup>1</sup>; Aurélia Souares<sup>2</sup>; Jean-Louis Koulidiati<sup>2</sup>; Quentin Stoeffler<sup>3</sup>; Zunzunegui Maria-Victoria<sup>1</sup>

**\*Correspondence** to Samiratou Ouédraogo

E-mail: [samioued@yahoo.fr](mailto:samioued@yahoo.fr)

Address: University of Montréal Public Health Research Institute, 7101, Avenue du Parc, 3rd Floor, Montréal, QC H3N 1X9, Canada

**Affiliations:**

<sup>1</sup> University of Montréal Public Health Research Institute (IRSPUM), Department of Social and Preventive Medicine, Montréal, Canada

<sup>2</sup>Institute of Public Health, University of Heidelberg, Heidelberg, Germany

<sup>3</sup>Agricultural and Resource Economics, University of California, Davis, USA

**Keywords:** Indigent; social vulnerability; community-based selection; universal health coverage; high-priority health service.

**Word count for article text: 3205**

**Word count for abstract: 288**

**Number of tables: 2**

**Number of figures: 1**

**Number of supplementary files: 1**

**ABSTRACT*****Background***

In Africa, health research on indigent people has focused on how to target them for programs and services, but little research has been conducted to identify the social groups that compose indigence. Our aim was to identify what makes someone indigent beyond being recognized by their community as needing a card for free healthcare.

***Methods***

We used data from a survey conducted to evaluate a project for performance-based financing of health services in two districts of Burkina Faso. In 2015, we interviewed 2,077 non-indigents and 1,009 people defined as indigents by their community in 20 villages. Using a classification tree, we built a model that made it possible to select socioeconomic and health characteristics that were likely to distinguish between non-indigents and indigents. We described the diagnostic performance of the tree using data from specific nodes.

***Results***

Widow(er)s under 45 years of age, unmarried people aged 45 years and over, and married women aged 60 years and over were more likely to be identified as indigents by their community. Simple rules based on marital status and gender detected indigents with sensitivity of 75.6% and specificity of 55% among those 45 years and over. Among those under 45, sensitivity was 85.5% and specificity 92.2%. Combining both tests, sensitivity was 78% and specificity 81%.

***Conclusion***

In its progress toward Universal Health Coverage, Burkina Faso should extend universal access to high-priority healthcare to unmarried people and those 45 years of age and over, and services should be adapted to their health needs.

***Ethics consideration***

1  
2  
3  
4  
5  
6  
7  
8  
9  
10  
11  
12  
13  
14  
15  
16  
17  
18  
19  
20  
21  
22  
23  
24  
25  
26  
27  
28  
29  
30  
31  
32  
33  
34  
35  
36  
37  
38  
39  
40  
41  
42  
43  
44  
45  
46  
47  
48  
49  
50  
51  
52  
53  
54  
55  
56  
57  
58  
59  
60

Approval for data collection, storage and release for research purpose has been given by the by an ethics committee of the Government of Burkina Faso approved the study (Decision No. 2013-7-066). Respondent consent was obtained verbally.

For peer review only

## ARTICLE SUMMARY

### Article focus

To identify what makes someone an indigent beyond being recognized by his or her community as needing a card for free healthcare.

### Key messages

- In rural Burkina Faso, indigence was associated with older age, unmarried status and female gender;
- Using Burkina Faso's 2014 Demographic Health Survey data, indigent population in rural areas would represent 1% of those under 45; 23% of those aged 45 and over and 45% of people aged 60 and over;
- Healthcare in Burkina Faso as in many other Sub-Saharan Africa countries should include high-priority services to unmarried middle aged and older adults particularly widow(er)s and older women, and be adapted to their health needs, including chronic diseases.

### Strengths and limitations of this study

The strengths of this study are:

To our knowledge, this is the first study that allowed characterizing those who constitute that indigent population in a Sub-Saharan Africa country;

Using an original study method and data from a substantial number of villages in Burkina Faso, we shed light on indigence by providing the characteristics of the indigents. These characteristics combined could identify indigents in rural areas with a sensitivity of 78% and a specificity of 81%.

The limitations of this study:

This study was limited to rural areas in Burkina Faso. More researches are needed to assess if these results could be generalize to urban areas.

## INTRODUCTION

Universal health coverage (UHC) has been a key objective for the international community since the call made by the United Nations in 2012. However, given resource constraints, countries must determine their own priorities, and UHC does not mean governments will be able to provide access to all possible health services. High-priority health services should, however, be available to everyone.<sup>1</sup> UHC implementation should follow the path of progressive universalism, which involves initially targeting indigents to support them proportionally to their level of disadvantage and offer them high-priority services.<sup>2</sup> Targeting social benefits in developing countries has proven challenging.<sup>3</sup> More specifically, identifying indigents is a challenge for healthcare sector reform, particularly in Africa,<sup>4</sup> where two processes have been regularly investigated: community-based targeting (CBT) and proxy mean testing (PMT).<sup>5</sup> In 2007, in Burkina Faso, CBT was tested in a rural district. Under health district leadership, village selection committees produced lists of indigents whom they selected based on a consensual definition and with no pre-determined criteria: “someone who is extremely disadvantaged socially and economically, unable to look after him/herself, and devoid of internal or external resources”. These persons received an official card for free access to healthcare.<sup>6</sup> This CBT was contextually relevant and effective for selecting indigents. Research has shown, however, that user fees exemptions are not enough and more is needed to ensure indigents benefit from services.<sup>7, 8</sup> Moreover, no study has identified who are those in a state of indigence. Are elderly adults protected informally by their extended families, or do they lack adequate resources to spend on healthcare in the absence of formal government safety nets and old age pensions? What access do poor women have to healthcare in societies where men have the decisional power in the family? In a patriarchal society, is being a woman a driver toward indigence?

In this study, our aim was to identify what makes someone an indigent beyond being recognized by his or her community as needing a card for free healthcare.

## POPULATION AND METHODS

### Setting

An intervention combining performance-based financing (RBF) for healthcare with user fees exemptions for indigents was implemented in 10 districts in Burkina Faso in 2014. It provided increased financing to healthcare structures and staff based on quantity and quality of care provided. Higher fee-for-service rates were offered for some services delivered to indigents.<sup>9</sup> To identify indigents in each district, a CBT process was implemented in villages concerned by the intervention. In each village, a selection committee developed a list of indigents based on their perception of the definition suggested by Ridde et al.<sup>6</sup> This list was validated by an external committee. The World Bank supported the program, paying up to 7.2 times more for some consultations for indigents than for those of non-indigents.

The present study was conducted in 20 villages in two rural districts of Burkina Faso with an agricultural economy: Diébougou (127,857 inhabitants) in the southwest and Gourcy (208,740 inhabitants) in the north. With only four general practitioners and no specialists in both districts, health services use in these areas is very low. In 2014, the average annual number of health visits per inhabitant was 1.03 in Diébougou and 0.73 in Gourcy.<sup>10</sup>

### Study sample

Data were collected between February and April 2015, dry season months, when households are more available for interviews than during the agricultural season.

Ten villages were randomly selected in each district; all households that included an indigent as identified by the CBT were included. For comparison, we randomly selected 85% of households without indigence in Diébougou and 45% in Gourcy.

Data were collected on tablets by trained investigators using Open Data Kit (ODK) software. The household questionnaire included modules on household composition, education, assets, and other dimensions. In households including at least one indigent, an individual health questionnaire survey was administered to the indigent member(s). In households without an indigent, an individual member was randomly selected and

1  
2  
3 administered the same individual health questionnaire. Altogether, 2,077 non-indigents  
4 and 1,009 indigents were interviewed in the two districts.  
5  
6  
7  
8

### 9 10 **Study variables**

11 Individual-level variables were selected based on health determinants reported in  
12 previous studies in Africa:<sup>11-13</sup>  
13

14 - Demographic characteristics: gender (male, female), age (18–24, 25–34, 35–44, 45–59,  
15 60+), marital status (single, monogamous union or living together, polygamous union,  
16 divorced or separated, widowed);  
17  
18

19 - Socio-economic characteristics: highest level of education (none, primary school,  
20 secondary school); engaging in income-producing activity in the past seven days;  
21 difficulties satisfying food needs; financial constraints making it difficult to buy food, use  
22 the health care centre, or buy medicines;  
23  
24

25 - Health: self-rated health (poor, not poor); self-reported chronic disease; visual  
26 impairment;  
27  
28

29 - Physical functioning: physical disability; limitations in walking 400 metres; upper limb  
30 strength limitations.  
31  
32  
33

### 34 35 36 37 38 39 40 **Ethics**

41 An ethics committee of the Government of Burkina Faso approved the study (Decision  
42 No. 2013-7-066). Respondent consent was obtained verbally.  
43  
44  
45  
46  
47  
48  
49  
50  
51  
52  
53  
54  
55  
56  
57  
58  
59  
60



## Data sharing

No additional data available

## Statistical methods

Chi-squared tests were used to compare socio-economic characteristics, health status, and physical functioning of non-indigents and indigents.

To create classification models (IBM SPSS Statistics Version 22), we used the IBM SPSS Decision Trees procedure. Classification and regression tree analysis is a non-parametric exploratory method that partitions the sample using explanatory variables so that segments obtained are as homogenous as possible with regard to the dependent variable.<sup>14</sup> Using the Quick Unbiased Efficient Statistical Tree method (QUEST), we built a model that allowed us to select socio-economic, health status, and physical functioning characteristics that were most likely to split non-indigents from indigents. All variables available for this study were specified in the decision tree model. Fourteen were included in the final model procedure: gender, age, highest level of education, marital status, engaging in income-producing activity, financial difficulties (financial constraints making it difficult to buy food or use the health care centre), perceived poor health, chronic disease, visual impairment, disability, ability to walk, and physical strength. Variables that did not contribute significantly were automatically removed from the final model.

The target category was "indigent". For each split, the association between each covariable and the target category was computed using Pearson's chi-square. At each step, the covariable showing the highest association with the target category was selected for splitting.<sup>15</sup> When specifying the model, we set an equal cost of misclassification for non-indigents and indigents, the value of alpha for splitting nodes at 0.05, minimum parent node size at 50, and parent node size at 25. We also performed a sensitivity analysis setting a higher cost of misclassification for indigents (twice that for non-indigents). We randomly split the sample into two subsamples (both including non-indigents and indigents), and the models were fitted using the first as a training sample and then testing on the second subsample. Trees were generated to maximum size,

1  
2  
3 where each node contained single-class data or no test offered improvement on the mix  
4 of classes at that node, then pruned to avoid over-fitting. We also assessed diagnostic  
5 performance of the test tree.  
6  
7  
8  
9  
10  
11  
12  
13  
14  
15  
16  
17  
18  
19  
20  
21  
22  
23  
24  
25  
26  
27  
28  
29  
30  
31  
32  
33  
34  
35  
36  
37  
38  
39  
40  
41  
42  
43  
44  
45  
46  
47  
48  
49  
50  
51  
52  
53  
54  
55  
56  
57  
58  
59  
60

For peer review only

## RESULTS

### Characteristics of the study population

The analysis sample consisted of 1783 (85.8%) non-indigents and 829 (82.2%) indigents aged 18 years and over with complete information. A total of 294 non-indigents' and 180 indigents' questionnaires were incomplete and excluded from analyses.

Of the total sample population, 1,433 (54.9%) lived in Gourcy, 1,555 (59.5%) were women, and 574 (22.0%) were aged 60 years and over. Most were illiterate (2,312, 88.5%); more than one-third (1004, 38.4%) had difficulties satisfying food needs; 12.6% (315) had difficulties walking 400 metres, and 15% (406) perceived their health as poor.

Table 1 presents the study sample characteristics by indigent status. Indigents were more likely to be women, older, illiterate and/or widowed. They were also more likely to be in poor health and to find it financially difficult to cover basic needs.

### Classification of non-indigents and indigents

Figure 1 presents the test tree diagram. Age, marital status, gender, upper limb strength limitations, and financial constraints preventing healthcare centre use and purchase of foodstuffs were the best covariates for separating non-indigents from indigents. All p-values for splitting the nodes were below 0.0001.

We used colour codes to represent tree nodes according to proportions of indigents: red (nodes 3, 9 and 15, with proportions of indigents above 75%); orange (nodes 1, 5, 8, 11, 18, 19, proportions between 50% and 75%); yellow (proportions between 25% and 50%), and green for groups with proportions under 25%. Red nodes (3, 9 and 15) could be used as screening tests with high specificity. Since the first partitioning variable, aged 45 years and over, was so strongly associated with indigence, we developed separate screening schemes for those aged 45 years and over and those under 45.

### Diagnostic performance

Among those aged 45 and over, two nodes (3 and 15) had high prevalence of indigence. Node 3, which comprised those 45 years and over who were unmarried, contained 150

1  
2  
3 of the total 332 indigents (45%) in that age group. The sensitivity of “being unmarried”  
4 to detect indigence among those 45 years and over was 45% (150/332), and specificity  
5 was 83% (218/264). Node 15, married women aged 60 years and over, had a prevalence  
6 of indigence of 81.6% and could be used to screen for indigence among those 45 years  
7 and over who were married, with sensitivity of 34% (62/182) and specificity of 94%  
8 (204/218). By combining nodes 3 and 15, we obtained a test of indigence among those  
9 45 years and over with sensitivity of 64% and specificity of 77%.

10  
11  
12  
13  
14  
15 Among those under 45, there was only one red node: node 9, being widowed. The  
16 sensitivity of “being widowed” for indigence was 66% (55/83), and specificity was  
17 99.2% (610/615). Combining these two screening criteria, for those 45 years and over  
18 and those under 45, we obtained sensitivity of 64.3% and specificity of 92.6%.

19  
20  
21  
22  
23 Sensitivity could be improved, with a compromise in specificity, by including the orange  
24 nodes in the screening criteria (Table 2). For those aged 45 years and over, screening for  
25 indigence was based on belonging to node 3 (unmarried men and women aged 45 and  
26 over) or node 8 (married women aged 45 and over) with sensitivity of 75.6% (251/332)  
27 and specificity of 55% (145/264). Among those under 45, screening could be based on  
28 belonging to node 5 (unmarried and under 45) or node 11 (under 45 with upper limb  
29 strength limitations), with sensitivity of 85.5% (71/83) and specificity of 92.2%  
30 (567/615).

31  
32  
33  
34  
35  
36  
37  
38 In summary, using simple rules based on easy-to-obtain indicators of marital status and  
39 gender, we were able to detect about 75.6% of indigent subjects among people aged 45  
40 years and over with specificity of 55%, and 85.5% of indigent subjects among those  
41 under 45, with specificity of 92.2%. Combining both tests, we obtained overall  
42 sensitivity of 78% and specificity of 81%.

43  
44  
45  
46  
47 Indigence was largely restricted to being old and unmarried. Indeed, the frequency of  
48 indigence among young people (<45 years) who were married or living with a partner  
49 was only 4.3%.

50  
51  
52  
53  
54  
55  
56  
57  
58  
59  
60 Goodness of fit of the classification tree was evaluated by the index value and the gains  
and index charts. The index value of the model was above 100%, the gains chart was  
different from the diagonal reference line, and the index chart started above 100%. Risk

1  
2  
3 of misclassification was 14.8%. Overall percentage of correct classification was 85.2%.  
4 The sensitivity analysis presented in Appendix 1 confirmed that age, gender, and marital  
5 status were strongly correlated with indigence.  
6  
7  
8  
9  
10  
11  
12  
13  
14  
15  
16  
17  
18  
19  
20  
21  
22  
23  
24  
25  
26  
27  
28  
29  
30  
31  
32  
33  
34  
35  
36  
37  
38  
39  
40  
41  
42  
43  
44  
45  
46  
47  
48  
49  
50  
51  
52  
53  
54  
55  
56  
57  
58  
59  
60

For peer review only

## DISCUSSION

Using survey data on individuals in 20 villages of two districts in Burkina Faso, we used classification and regression tree methodology to identify best predictors of indigence, as defined by the community. Results showed that being aged 45 years and over, unmarried, and/or a woman were strong predictors of being identified as indigents. Using simple rules based only on easy-to-obtain indicators of marital status and gender, we were able to detect three-quarters of indigents among those aged 45 years and over and six out of seven indigents among those under 45.

Population aging has emerged as a major demographic trend even in low-income countries like Burkina Faso, posing challenges to social institutions.<sup>16</sup> With a population estimated at 17.59 million in 2014 and a poverty headcount ratio of 46.7%, Burkina Faso is one of the poorest countries in the world. Life expectancy has increased in recent years, estimated at 58 years for males and 59 for females in 2013.<sup>[17]</sup> To our knowledge, in middle- and low-income countries like Burkina Faso, despite increases in the older adult population generating a greater burden of chronic conditions,<sup>[18]</sup> social and health policies to adapt to the changing age structure are rare. McEniry and McDermott<sup>19</sup> describe low-income countries like Burkina Faso as countries where mortality declined rapidly very late in the 20th century. However, in these countries, the health of older cohorts is shaped by survivorship of poor early-life conditions, resulting in early onset of chronic diseases and high prevalence of frailty. Our study showed that aging leads to both poor health and deprivation in Burkina Faso. Roth,<sup>20</sup> studying intergenerational relations in Burkina Faso, reported that strength, energy, and therefore the opportunity to earn one's keep decreased with age. Those who cannot participate in reciprocal exchanges of gifts or services risk social marginalization. Yet with no social security<sup>21</sup> and without exchange relations, there is no social recognition.

Our study also revealed unmarried people were more likely to be indigents. As marriage in Africa marks the transition to adulthood, single persons are not recognized as adults able to assume responsibilities.<sup>20</sup> Marriage confers status and dignity,<sup>22</sup> providing individuals with a sense of meaning and of obligation to others, while inhibiting risky behaviours and encouraging healthy ones.<sup>23</sup> Previous studies have reported that single, divorced, or bereaved persons showed higher mortality and morbidity in specific

1  
2  
3 diseases,<sup>24, 25</sup> as well as lower quality of life <sup>26</sup> compared with those who were married  
4 or cohabiting. The differences between married and unmarried people may reflect not  
5 only a causal effect of marriage but also a selection effect: healthier people may be more  
6 likely than others to find mates and marry.<sup>27</sup>  
7  
8

9  
10 Widows across the globe share two common experiences: loss of social status and  
11 reduced economic circumstances.<sup>28</sup> In developed countries, widowhood is experienced  
12 primarily by elderly women, while in developing countries it also affects younger  
13 women, many of whom are still rearing children. Widowers, even when elderly, are far  
14 more likely to remarry,<sup>29</sup> but this is not the case for widows, who, if they do remarry,  
15 rarely do so of their own free will. As a result, many women spend a long period of their  
16 lives in widowhood, with all its associated disadvantages and stigmas.<sup>28</sup> In Burkina Faso,  
17 the sociocultural context is still marked by beliefs and practices leading to  
18 discrimination against women, particularly older women, including widow inheritance,  
19 forced marriage, and social exclusion of women for witchcraft allegations. Belief in  
20 witchcraft is more dominant in rural areas, where poverty usually leads to strained  
21 human and in-law relations, and where most illnesses cannot be explained.<sup>30</sup> Women  
22 victims of such violence and discrimination are mostly seniors, have had not children or  
23 only girls, have emigrated, or their children have not "succeeded". They are widowed or  
24 postmenopausal, poor, and uneducated.<sup>31</sup> In our study, women who were indigents were  
25 likely to carry health consequences of their reproductive history. After surviving  
26 adolescent childbirth and multiparity, they were at high risk of lower physical  
27 performance,<sup>32</sup> chronic diseases, incontinence <sup>33</sup> or fistula.<sup>34</sup> Supporting this line of  
28 evidence, Doulogou et al. <sup>29</sup> reported that widows in Burkina Faso were more  
29 vulnerable to hypertension than married women of similar age, education and health  
30 behaviours.  
31  
32  
33  
34  
35  
36  
37  
38  
39  
40  
41  
42  
43  
44  
45

46  
47 The classification tree showed that even married women, if aged 60 years and over,  
48 were more likely to be indigents. Power inequalities in gender relationships, affecting  
49 access to resources and decision-making on sexual and reproductive issues, are frequent  
50 in West African societies.<sup>35</sup> Harmful cultural practices, such as widow cleansing, son  
51 preference, and others, remain threats to women's health and well-being.<sup>36</sup> Onadja et al.  
52 reported that being a woman was positively associated with higher odds of cognitive  
53  
54  
55  
56  
57  
58  
59  
60

1  
2  
3 impairment and mobility disability in Burkina Faso, and the size of associations  
4 appeared insensitive to adjustment for various life-course socioeconomic and health  
5 conditions.<sup>37</sup> Females make up an increasing proportion of the world's poor.<sup>38</sup> This  
6  
7 situation is exacerbated by age and marital status, as shown in this research.  
8  
9

### 10 11 **Policy implications**

12  
13 The way the state is organized often exacerbates existing social cleavages, intensifying  
14 inequalities between rich and poor. For many vulnerable groups, such as older adults,  
15 unmarried adults, and widowed women, changes over the past decade have eroded  
16 important social safety networks and practices.<sup>39</sup> Targeting the poorest for free access to  
17 healthcare or financial assistance has emerged as an alternative to UHC in many  
18 developing countries. Such targeting requires effective selection strategies. Our results  
19 show that three groups compose the indigent population in Burkina Faso: widow(er)s  
20 under 45, unmarried people aged 45 years and over, and married women aged 60 years  
21 and over. Using the country's 2014 Demographic Health Survey data, we selected and  
22 described these groups and found they represented 1% of the total population under 45,  
23 23% of those aged 45 and over, and 45% of people aged 60 and over.  
24  
25  
26  
27  
28  
29  
30  
31  
32

33  
34 In its progress toward UHC, the government of Burkina Faso has implemented, since  
35 April 2, 2016, free access to maternal and child healthcare. However, as reported here,  
36 there are other vulnerable groups with poor health and limited access to health services.  
37 Healthcare in Burkina Faso should include high-priority services to unmarried people  
38 and those aged 45 years and over (like in Senegal, where elderly people have free access  
39 to healthcare),<sup>40</sup> particularly widow(er)s and older women, and be adapted to their  
40 health needs, including chronic diseases.  
41  
42  
43  
44  
45  
46  
47

### 48 **Conclusion**

49  
50 Using an original study method, this study sheds light on indigence by providing the  
51 characteristics of indigents as perceived by their own communities. Indigence is rare  
52 among the married population under 45 and frequent among unmarried adults and  
53 older adults, particularly widows(er)s and older women. Indigent people reported  
54 poorer health, chronic disease, and limitations in physical functioning. This implies that  
55  
56  
57  
58  
59  
60



1  
2  
3 patient-centred healthcare for indigent people must take into account age and gender  
4 and the management of chronic conditions.  
5  
6  
7  
8  
9  
10  
11  
12  
13  
14  
15  
16  
17  
18  
19  
20  
21  
22  
23  
24  
25  
26  
27  
28  
29  
30  
31  
32  
33  
34  
35  
36  
37  
38  
39  
40  
41  
42  
43  
44  
45  
46  
47  
48  
49  
50  
51  
52  
53  
54  
55  
56  
57  
58  
59  
60

For peer review only

### **AUTHORS' CONTRIBUTIONS**

Samiratou Ouédraogo performed the statistical analysis, interpreted the results, reviewed the literature, and prepared the manuscript.

Valéry Ridde was involved in conception of the study design, data collection, statistical analysis, interpretation of results, literature review, and manuscript preparation.

Nicole Atchessi was involved in conception of the study design, data collection, and manuscript preparation.

Aurélia Souares was involved in conception of the study design, data collection, and manuscript preparation.

Jean-Louis Koulidiati was involved in conception of the study design, data collection, and manuscript preparation.

Quentin Stoeffler participated in conception of the study design, data collection, and manuscript preparation.

Zunzunegui Maria-Victoria was involved in conception of the study design, statistical analysis, interpretation of results, literature review, and manuscript preparation.

All authors read and approved the final manuscript.

## FUNDING STATEMENT

The “African Region Multi-Donor Trust Fund on Poverty and Social Impact Analysis (PSIA)” funded data collection for this study. The World Bank and the Canadian Institutes of Health Research (CIHR) through the project “Community research studies and interventions for health equity in Burkina Faso” (Grant number ROH-115213) funded statistical analysis, interpretation and manuscript preparation. Valéry Ridde holds a CIHR-funded Research Chair in Applied Public Health (CPP 137901).

The funding body did not play any role in study design; analysis; interpretation of data; writing of the manuscript and the decision to submit it for publication.

## ACKNOWLEDGEMENTS

We thank Anne-Marie Turcotte-Tremblay and Donna Riley for assistance in the editing of the manuscript.

We thank Yamba Kafando, Jake Robin, Haidara Ousmane Diadie, and Philippe Compaoré for their assistance during the study.

We thank the research NGO “AGIR” and its investigators for conducting the interviews.

We thank “SERSAP” for coordinating the selection of indigents by the communities.

We thank the Demographic and Health Surveys (DHS) Program for providing Burkina Faso’s 2014 DHS data.

## COMPETING INTERESTS

We declare that we have no conflicts of interest.

For peer review only

1  
2  
3  
4  
5  
6  
7  
8  
9  
10  
11  
12  
13  
14  
15  
16  
17  
18  
19  
20  
21  
22  
23  
24  
25  
26  
27  
28  
29  
30  
31  
32  
33  
34  
35  
36  
37  
38  
39  
40  
41  
42  
43  
44  
45  
46  
47  
48  
49

**TABLES**

**Table 1: Comparison of socio-economic characteristics and health status between non-indigents and indigents**

| Variables                                  | Total Number | Non-indigents |            | Indigents  |            | P value |
|--------------------------------------------|--------------|---------------|------------|------------|------------|---------|
|                                            |              | Number        | Percentage | Number     | Percentage |         |
|                                            |              | <b>1783</b>   |            | <b>829</b> |            |         |
| <b>District</b>                            |              |               |            |            |            | <0.0001 |
| Diébougou                                  | 1179         | 631           | 35.4       | 548        | 66.1       |         |
| Gourcy                                     | 1433         | 1152          | 64.6       | 281        | 33.9       |         |
| <b>Gender</b>                              |              |               |            |            |            | <0.0001 |
| Male                                       | 1057         | 802           | 45.0       | 255        | 30.8       |         |
| Female                                     | 1555         | 981           | 55.0       | 574        | 69.2       |         |
| <b>Age (years)</b>                         |              |               |            |            |            | <0.0001 |
| 18-24                                      | 368          | 364           | 20.4       | 4          | 0.5        |         |
| 25-34                                      | 555          | 524           | 29.4       | 31         | 3.7        |         |
| 35-44                                      | 457          | 328           | 18.4       | 129        | 15.6       |         |
| 45-59                                      | 658          | 333           | 18.4       | 325        | 39.2       |         |
| 60+                                        | 574          | 234           | 13.1       | 340        | 41.0       |         |
| <b>Highest level of education achieved</b> |              |               |            |            |            | <0.0001 |
| None                                       | 2312         | 1522          | 85.4       | 790        | 95.3       |         |

|                                                                |      |      |      |     |      |         |
|----------------------------------------------------------------|------|------|------|-----|------|---------|
| Primary school                                                 | 213  | 188  | 10.5 | 25  | 3.0  |         |
| Secondary school                                               | 87   | 73   | 4.1  | 14  | 1.7  |         |
| <b>Marital status</b>                                          |      |      |      |     |      | <0.0001 |
| Single                                                         | 111  | 68   | 3.8  | 43  | 5.2  |         |
| Monogamous union or living together                            | 1308 | 1035 | 58.0 | 273 | 32.9 |         |
| Polygamous union                                               | 715  | 562  | 31.5 | 153 | 18.5 |         |
| Divorced or separated                                          | 25   | 8    | 0.4  | 17  | 2.1  |         |
| Widowed                                                        | 453  | 110  | 6.2  | 343 | 41.4 |         |
| <b>Engaged in income-producing activity in the past 7 days</b> |      |      |      |     |      | <0.0001 |
| No                                                             | 2044 | 1344 | 75.4 | 700 | 84.4 |         |
| Yes                                                            | 568  | 439  | 24.6 | 129 | 15.6 |         |
| <b>Difficulties satisfying food needs</b>                      |      |      |      |     |      | <0.0001 |
| No                                                             | 1608 | 1219 | 68.4 | 389 | 46.9 |         |
| Yes                                                            | 1004 | 564  | 31.6 | 440 | 53.1 |         |
| <b>Financial difficulties that prevent buying foodstuffs</b>   |      |      |      |     |      | <0.0001 |
| No                                                             | 1561 | 1210 | 67.9 | 351 | 42.3 |         |
| Yes                                                            | 1051 | 573  | 32.1 | 478 | 57.7 |         |

1  
2  
3  
4  
5  
6  
7  
8  
9  
10  
11  
12  
13  
14  
15  
16  
17  
18  
19  
20  
21  
22  
23  
24  
25  
26  
27  
28  
29  
30  
31  
32  
33  
34  
35  
36  
37  
38  
39  
40  
41  
42  
43  
44  
45  
46  
47  
48  
49

|                                                                           |      |      |      |     |      |  |         |
|---------------------------------------------------------------------------|------|------|------|-----|------|--|---------|
| <b>Financial difficulties that prevent going to the healthcare centre</b> |      |      |      |     |      |  | <0.0001 |
| No                                                                        | 1553 | 1250 | 70.1 | 303 | 36.6 |  |         |
| Yes                                                                       | 1059 | 533  | 29.9 | 526 | 63.4 |  |         |
| <b>Financial difficulties that prevent buying medicines</b>               |      |      |      |     |      |  | <0.0001 |
| No                                                                        | 1610 | 1280 | 71.8 | 330 | 39.8 |  |         |
| Yes                                                                       | 1002 | 503  | 28.2 | 499 | 60.2 |  |         |
| <b>Perceived poor health</b>                                              |      |      |      |     |      |  | <0.0001 |
| No                                                                        | 2206 | 1629 | 91.4 | 577 | 69.6 |  |         |
| Yes                                                                       | 406  | 154  | 8.6  | 252 | 30.4 |  |         |
| <b>Chronic disease</b>                                                    |      |      |      |     |      |  | <0.0001 |
| No                                                                        | 1592 | 1243 | 69.7 | 349 | 42.1 |  |         |
| Yes                                                                       | 1020 | 540  | 30.3 | 480 | 57.9 |  |         |
| <b>Disability</b>                                                         |      |      |      |     |      |  | <0.0001 |
| No                                                                        | 2297 | 1679 | 94.2 | 618 | 74.5 |  |         |
| Yes                                                                       | 315  | 104  | 5.8  | 211 | 25.5 |  |         |
| <b>Perceived limitations in ability to walk 400m</b>                      |      |      |      |     |      |  | <0.0001 |
| No                                                                        | 2366 | 1702 | 95.5 | 664 | 80.1 |  |         |



|    |                                                     |      |      |      |     |      |         |
|----|-----------------------------------------------------|------|------|------|-----|------|---------|
| 5  | Yes                                                 | 246  | 81   | 4.5  | 165 | 19.9 |         |
| 7  | <b>Perceived limitations in upper limb strength</b> |      |      |      |     |      | <0.0001 |
| 9  | No                                                  | 2282 | 1697 | 95.2 | 585 | 70.6 |         |
| 11 | Yes                                                 | 330  | 86   | 4.8  | 244 | 29.4 |         |
| 12 | <b>Visual impairment</b>                            |      |      |      |     |      | 0.4     |
| 14 | No                                                  | 2560 | 1745 | 97.9 | 815 | 98.3 |         |
| 15 | Yes                                                 | 52   | 38   | 2.1  | 14  | 1.7  |         |

**Table 2: Diagnostic performance of the test tree**

| Characteristics                 | Test tree nodes                    | Sensitivity    | Specificity    | Positive predictive value | Negative predictive value |
|---------------------------------|------------------------------------|----------------|----------------|---------------------------|---------------------------|
| <b>Under 45</b>                 | Red node (9)                       | 0.66 (55/83)   | 0.99 (610/615) | 0.92 (55/60)              | 0.96 (610/638)            |
|                                 | Red and orange nodes (5, 11)       | 0.86 (71/83)   | 0.92 (567/615) | 0.60 (71/119)             | 0.98 (567/579)            |
| <b>45 years of age and over</b> | Red nodes (3, 15)                  | 0.64 (212/332) | 0.77 (204/264) | 0.78 (212/272)            | 0.63 (204/324)            |
|                                 | Red and orange nodes (3, 8)        | 0.76 (251/332) | 0.55 (145/264) | 0.68 (251/370)            | 0.64 (145/226)            |
| <b>All ages</b>                 | Red nodes (3, 9, 15)               | 0.64 (267/415) | 0.93 (814/879) | 0.80 (267/332)            | 0.85 (814/962)            |
|                                 | Red and orange nodes (3, 5, 8, 11) | 0.78 (322/415) | 0.81 (712/879) | 0.66 (322/489)            | 0.88 (712/805)            |

Data are percentages, with numbers of patients in parentheses:

- Sensitivity in under 45 was 66% (red node) = (Total indigents in node 9) / (Total indigents in this age group; node 2) x 100;

- Specificity in all ages was 81% (red and orange nodes) = [(Total non-indigents in node 1) - (Total non-indigents in nodes 3 and 8)] + [(Total non-indigents in node 2) - (Total non-indigents in nodes 5 and 11)] / total non-indigents in all ages groups (nodes 1 and 2) x 100;

- Positive predictive value in all ages was 80% (red nodes 3, 9, and 15) = (Total indigents in red nodes 3, 9, and 15) / (Total non-indigent and indigents in red nodes 3, 9, and 15) x 100.

1  
2  
3  
4  
5 - Negative predictive value in under 45 was 98% (red and orange nodes) =  $\frac{[(\text{Total non-indigents in node 2}) - (\text{Total non-indigents in}$   
6  $\text{nodes 5 and 11})]}{[(\text{Total indigents in node 2} - \text{Total indigents in nodes 5 and 11}) + (\text{Total non-indigents in node 2} - \text{Total non-indigents}$   
7  $\text{in nodes 5 and 11})]} \times 100$ .  
8  
9

10  
11  
12  
13  
14  
15  
16  
17  
18  
19  
20  
21  
22  
23  
24  
25  
26  
27  
28  
29  
30  
31  
32  
33  
34  
35  
36  
37  
38  
39  
40  
41  
42  
43  
44  
45  
46  
47  
48  
49

For peer review only

FIGURE 1

1  
2  
3  
4  
5  
6  
7  
8  
9  
10  
11  
12  
13  
14  
15  
16  
17  
18  
19  
20  
21  
22  
23  
24  
25  
26  
27  
28  
29  
30  
31  
32  
33  
34  
35  
36  
37  
38  
39  
40  
41  
42  
43  
44  
45  
46  
47  
48  
49

For peer review only

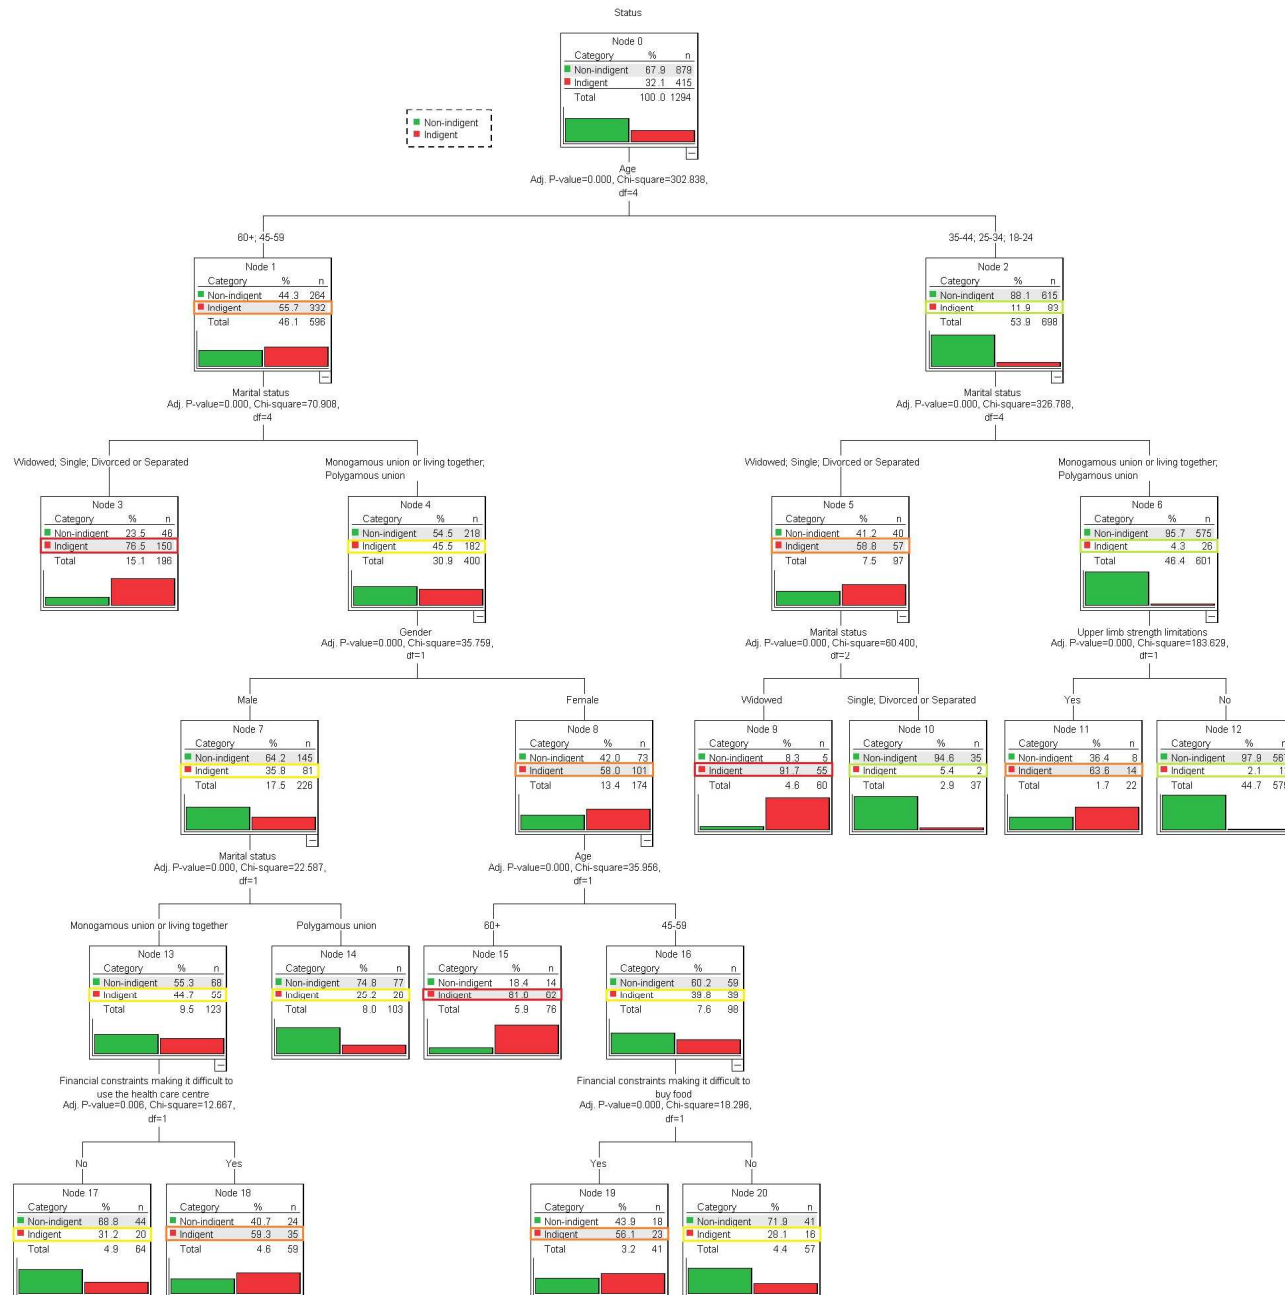

APPENDIX 1

1  
2  
3  
4  
5  
6  
7  
8  
9  
10  
11  
12  
13  
14  
15  
16  
17  
18  
19  
20  
21  
22  
23  
24  
25  
26  
27  
28  
29  
30  
31  
32  
33  
34  
35  
36  
37  
38  
39  
40  
41  
42  
43  
44  
45  
46  
47  
48  
49

Results of the test tree, where the cost of misclassifying indigents as non-indigents was set to be twice the cost of misclassifying non-indigents as indigents. The value of alpha for splitting nodes was set at 0.05, minimum parent node size at 50, and parent node size at 25.

The index value and the gains and index charts indicate the classification was good. The index value of the model was greater than 100%, the gains chart was different from the diagonal reference line, and the index chart started above 100%. The risk of misclassification was 20.9%. The overall percentage of correct classification was 83.4%, and 86.5% of indigents were accurately classified by the model.

For peer review only

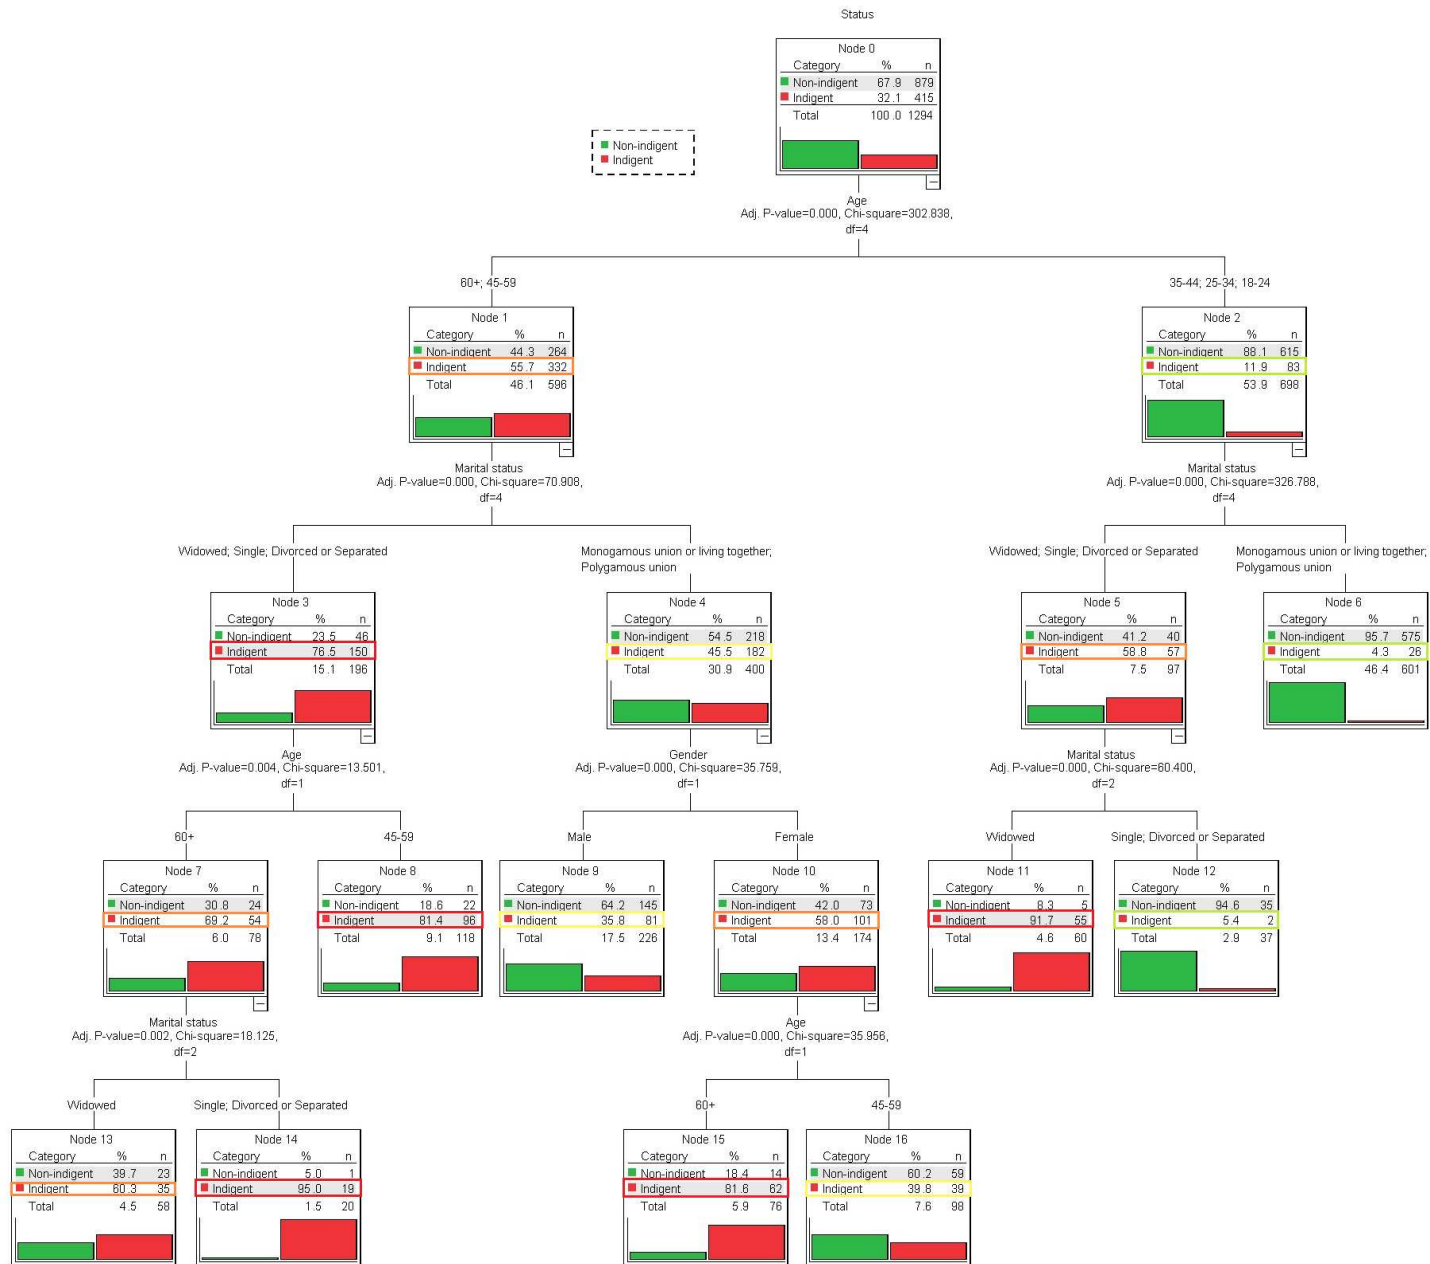

## REFERENCE LIST

1. Chan M. Making fair choices on the path to universal health coverage. *Health Systems & Reform* 2016;2(Suppl 1):5-7.
2. Nicholson D, Yates R, Warburton W et al. Delivering universal health coverage: a guide for policymakers. Report of the WISH Universal Health Coverage Forum 2015. WISH Partners, 2015. <https://www.imperial.ac.uk/media/imperial-college/institute-of-global-healthinnovation/public/Universal-health-coverage.pdf>
3. Ellis F. 'We are all poor here': economic difference, social divisiveness and targeting cash transfers in Sub-Saharan Africa. *J Dev Stud* 2012;48(Suppl 2):201-14.
4. Ridde V. "The problem of the worst-off is dealt with after all other issues": the equity and health policy implementation gap in Burkina Faso. *Soc Sci Med [Med Anthropol]* 2008;66(6):1368-78.
5. Conning J, Kevane M. Community based targeting mechanisms for social safety nets: a critical review. *World Dev* 2002;30:375-94.
6. Hanson K, Worrall E, Wiseman V. Targeting services towards the poor: a review of targeting mechanisms and their effectiveness. In: Bennett S, Gilson L, Mills A, eds. Health, economic development and household poverty: from understanding to action. London: Routledge 2007. p. 134-54.
7. Atchessi N, Ridde V, Zunzunegui MV. User fees exemptions alone are not enough to increase indigent use of healthcare services. *Health Policy Plan* 2016. Epub 2016 Feb 7. doi: 10.1093/heapol/czv135
8. Atchessi N, Ridde V, Zunzunegui MV. Is the process for selecting indigents to receive free care in Burkina Faso equitable? *BMC Public Health* 2014;14:1158.
9. Ridde V, Turcotte-Tremblay AM, Souares A, et al. Protocol for the process evaluation of interventions combining performance-based financing with health equity in Burkina Faso. *Implement Sci* 2014;9:149.
10. Ministère de la santé du Burkina Faso. Annuaire statistique 2014. Ouagadougou: Direction générale des études et des statistiques sectorielles; 2015. [http://cns.bf/IMG/pdf/annuaire\\_2014\\_du\\_ms.pdf](http://cns.bf/IMG/pdf/annuaire_2014_du_ms.pdf)
11. Araújo LF, Giatti L, Chor D, et al. Maternal education, anthropometric markers of malnutrition and cognitive function (ELSA-Brasil). *BMC Public Health* 2014;14:673.
12. Badini-Kinda F. The gap between ideas and practices: elderly social insecurity in rural Burkina Faso / L'écart entre idées et pratiques : l'insécurité sociale des personnes âgées en milieu rural burkinabé. In: de Jong W, Roth C, Badini-Kinda F, Bhagyanath S, eds. Ageing in insecurity: case studies on social security and gender in India and Burkina Faso / Vieillir dans l'insécurité: sécurité sociale et genre en Inde et au Burkina Faso: études de cas. Piscataway, NJ: Transaction Publishers 2005. p. 139-66, 323-51.
13. Walker JA. Early marriage in Africa--trends, harmful effects and interventions. *Afr J Reprod Health* 2012;16(Suppl 2):231-40.
14. Valmy L, Gontier B, Parriault MC, et al. Prevalence and predictive factors for renouncing medical care in poor populations of Cayenne, French Guiana. *BMC Health Serv Res* 2016;16:34.
15. Rokach L, Maimon O. Top-down induction of decision trees classifiers - a survey. *IEEE Trans Syst Man Cybern* 2002;1(Suppl 11):12.



- 1  
2  
3 16. Kinsella K, He W. An aging world: 2008. International population reports. Washington, DC: U.S.  
4 Government Printing Office; 2009. Contract No.: P95/09-1.  
5  
6 17. The World Bank. Burkina Faso. 2016. <http://data.worldbank.org/country/burkina-faso>.  
7  
8 18. Oizumi K, Kajiwara H, Aratame N. Facing up to the problem of population aging in developing  
9 countries: new perspectives for assistance and cooperation. Tokyo: Institute for International  
10 Cooperation, Japan International Cooperation Agency (JICA); 2006.  
11  
12 19. McEniry M, McDermott J. Early-life conditions, rapid demographic changes, and older adult health in  
13 the developing world. *Biodemography Soc Biol* 2015;61(Suppl 2):147- 66.  
14  
15 20. Roth C. Les relations intergénérationnelles sous pression au Burkina Faso. *Autrepart: Vieillir au Sud*.  
16 2010;95-110. doi: 10.3917/autr.053.0095  
17  
18 21. Roth C. Threatening dependency: limits of social security. Old age and gender in urban Burkina Faso /  
19 Dépendance menaçante : limites de la sécurité sociale, vieil âge et genre en milieu urbain burkinabé. In: de  
20 Jong W, Roth C, Badini-Kinda F, Bhagyanath S, eds. Ageing in insecurity: case studies on social security and  
21 gender in India and Burkina Faso / Vieillir dans l'insécurité: sécurité sociale et genre en Inde et au Burkina  
22 Faso: études de cas. Piscataway, NJ: Transaction Publishers 2005. p. 107-37, 289-322.  
23  
24 22. Kyalo P. A reflection on the African traditional values of marriage and sexuality. *IJ-ARPEd*.  
25 2012;1(Suppl 2):211-9.  
26  
27 23. Waite L, Gallagher M. The case for marriage: why married people are happier, healthier and better off  
28 financially. New York: Broadway Books; 2000.  
29  
30 24. Joung IM, van de Mheen H, Stronks K, et al. Differences in self-reported morbidity by marital status and  
31 by living arrangement. *Int J Epidemiol* 1994;23(Suppl 1):91-7.  
32  
33 25. Hu YR, Goldman N. Mortality differentials by marital status: an international comparison. *Demography*  
34 1990;27(Suppl 2):233-50.  
35  
36 26. Han KT, Park EC, Kim JH, et al. Is marital status associated with quality of life? *Health Qual Life*  
37 *Outcomes* 2014;12:109.  
38  
39 27. Bramlett MD, Mosher WD. Cohabitation, marriage, divorce, and remarriage in the United States. Vital  
40 and Health Statistics, Series 23. Washington, DC: Department of Health and Human Services, Centers for  
41 Disease Control and Prevention; 2002. 93 p.  
42  
43 28. United Nations. Widowhood: invisible women, secluded or excluded. New York: United Nations  
44 Division for the Advancement of Women; 2001.  
45 [http://www.un.org/womenwatch/daw/public/wom\\_Dec%2001%20single%20pg.pdf](http://www.un.org/womenwatch/daw/public/wom_Dec%2001%20single%20pg.pdf)  
46  
47 29. Doulogou B, Kouanda S, Rossier C, et al. Differences in hypertension between informal and formal  
48 areas of Ouagadougou, a sub-Saharan African city. *BMC Public Health* 2014;14:893.  
49  
50 30. Meel BL. Witchcraft in Transkei Region of South African: case report. *Afr Health Sci* 2009;9(Suppl  
51 1):61-4.  
52  
53 31. Nebie-Zoma DS [Internet]. L'exclusion sociale pour allégation de sorcellerie, une violence faites aux  
54 femmes. 2014. <http://www.genreenaction.net/L-exclusion-sociale- pour-allegation-de.html>.  
55  
56  
57  
58  
59  
60

- 1  
2  
3 32. Câmara SMA, Pirkle C, Moreira MA, et al. Early maternal age and multiparity are associated to poor  
4 physical performance in middle- aged women from Northeast Brazil: a cross-sectional community based  
5 study. *BMC Womens Health* 2015;15:56.  
6  
7 33. Kepenekci I, Keskinilic B, Akinsu F, et al. Prevalence of pelvic floor disorders in the female population  
8 and the impact of age, mode of delivery, and parity. *Dis Colon Rectum* 2011;54(Suppl 1):85-94.  
9  
10 34. Maheu-Giroux M, Filippi V, Maulet N, et al. Risk factors for vaginal fistula symptoms in Sub- Saharan  
11 Africa: a pooled analysis of national household survey data. *BMC Pregnancy Childbirth* 2016;16(Suppl  
12 1):82.  
13  
14 35. Sen G, Östlin P, George A. Unequal, unfair, ineffective and inefficient gender inequity in health: why it  
15 exists and how we can change it. Final report to the WHO Commission on Social Determinants of Health,  
16 September 2007. Geneva: World Health Organization, Women and Gender Equity Knowledge Network;  
17 2007.  
18  
19 36. Durojaye E. 'Woman, but not human': widowhood practices and human rights violations in Nigeria. *I J*  
20 *Law Policy Family* 2013;27:176-96.  
21  
22 37. Onadja Y, Atchessi N, Soura BA, et al. Gender differences in cognitive impairment and mobility  
23 disability in old age: a cross-sectional study in Ouagadougou, Burkina Faso. *Arch Gerontol Geriatr*  
24 2013;57(Suppl 3):311-8.  
25  
26 38. Moghadam MV. The 'feminization of poverty' and women's human rights. Paris: UNESCO, Division of  
27 Human Rights, Gender Equality and Development Section; 2005.  
28  
29 39. Narayan D, Patel R, Schafft K, et al. Can anyone hear us? Voices from 47 countries. Washington, DC:  
30 World Bank, Poverty Group, PREM; 1999.  
31  
32 40. Leye MMM, Diongue M, Faye A, et al. Analyse du fonctionnement du plan de prise en charge gratuite  
33 des soins chez les personnes âgées « Plan Sésame » au Sénégal. *Santé Publique* 2013;25:101-6.  
34 [www.cairn.info/revue-sante-publique-2013-1-page-101.htm](http://www.cairn.info/revue-sante-publique-2013-1-page-101.htm)  
35  
36  
37  
38  
39  
40  
41  
42  
43  
44  
45  
46  
47  
48  
49  
50  
51  
52  
53  
54  
55  
56  
57  
58  
59  
60

# BMJ Open

## Characterisation of rural indigent population in Burkina Faso: A helpful screening tool for setting priority health care services in Sub-Saharan African

|                                 |                                                                                                                                                                                                                                                                                                                                                                                                                                                                                                                                                                                                                                                                                                                                                                                                                                                                                                                                                                    |
|---------------------------------|--------------------------------------------------------------------------------------------------------------------------------------------------------------------------------------------------------------------------------------------------------------------------------------------------------------------------------------------------------------------------------------------------------------------------------------------------------------------------------------------------------------------------------------------------------------------------------------------------------------------------------------------------------------------------------------------------------------------------------------------------------------------------------------------------------------------------------------------------------------------------------------------------------------------------------------------------------------------|
| Journal:                        | <i>BMJ Open</i>                                                                                                                                                                                                                                                                                                                                                                                                                                                                                                                                                                                                                                                                                                                                                                                                                                                                                                                                                    |
| Manuscript ID                   | bmjopen-2016-013405.R1                                                                                                                                                                                                                                                                                                                                                                                                                                                                                                                                                                                                                                                                                                                                                                                                                                                                                                                                             |
| Article Type:                   | Research                                                                                                                                                                                                                                                                                                                                                                                                                                                                                                                                                                                                                                                                                                                                                                                                                                                                                                                                                           |
| Date Submitted by the Author:   | 29-Dec-2016                                                                                                                                                                                                                                                                                                                                                                                                                                                                                                                                                                                                                                                                                                                                                                                                                                                                                                                                                        |
| Complete List of Authors:       | Ouédraogo, Samiratou; University of Montréal Public Health Research Institute, Department of Social and Preventive Medicine; University of Montreal School of Public Health<br>Ridde, Valéry; University of Montréal Public Health Research Institute, Department of Social and Preventive Medicine; University of Montreal School of Public Health<br>Atchessi, Nicole; University of Montréal Public Health Research Institute, Department of Social and Preventive Medicine; University of Montreal School of Public Health<br>Souares, Aurélia; University of Heidelberg, Institute of Public Health<br>Koulidiati, Jean-Louis; University of Heidelberg, Institute of Public Health<br>Stoeffler, Quentin; University of California, Agricultural and Resource Economics<br>Zunzunegui, Maria-Victoria; University of Montréal Public Health Research Institute, Department of Social and Preventive Medicine; University of Montreal School of Public Health |
| <b>Primary Subject Heading</b>: | Global health                                                                                                                                                                                                                                                                                                                                                                                                                                                                                                                                                                                                                                                                                                                                                                                                                                                                                                                                                      |
| Secondary Subject Heading:      | Health services research, Public health, Research methods, Epidemiology                                                                                                                                                                                                                                                                                                                                                                                                                                                                                                                                                                                                                                                                                                                                                                                                                                                                                            |
| Keywords:                       | Indigent, social vulnerability, community-based selection, universal health coverage, high-priority health service, Burkina Faso                                                                                                                                                                                                                                                                                                                                                                                                                                                                                                                                                                                                                                                                                                                                                                                                                                   |
|                                 |                                                                                                                                                                                                                                                                                                                                                                                                                                                                                                                                                                                                                                                                                                                                                                                                                                                                                                                                                                    |

SCHOLARONE™  
Manuscripts

**RESEARCH ARTICLE**

**Title: Characterisation of rural indigent population in Burkina Faso: A helpful screening tool for setting priority health care services in Sub-Saharan African**

**Authors:**

Samiratou Ouédraogo<sup>1\*</sup>; Valéry Ridde<sup>1</sup>; Nicole Atchessi<sup>1</sup>; Aurélia Souares<sup>2</sup>; Jean-Louis Koulidiati<sup>2</sup>; Quentin Stoeffler<sup>3</sup>; Maria-Victoria Zunzunegui<sup>1</sup>

**\*Correspondence** to Samiratou Ouédraogo

E-mail: [samioued@yahoo.fr](mailto:samioued@yahoo.fr)

Address: University of Montréal Public Health Research Institute, 7101, Avenue du Parc,  
3rd Floor, Montréal, QC H3N 1X9, Canada

**Affiliations:**

<sup>1</sup> University of Montréal Public Health Research Institute (IRSPUM), Department of Social and Preventive Medicine, ESPUM, Montréal, Canada

<sup>2</sup>Institute of Public Health, University of Heidelberg, Heidelberg, Germany

<sup>3</sup>Agricultural and Resource Economics, University of California, Davis, USA

**Keywords:** Indigent; social vulnerability; community-based selection; universal health coverage; high-priority health service, Burkina Faso.

**Word count for article text: 3305**

**Word count for abstract: 289**

**Number of tables: 2**

**Number of figures: 1**

**Number of supplementary files: 1**

**ABSTRACT*****Background***

In Africa, health research on indigent people has focused on how to target them for services, but little research has been conducted to identify the social groups that compose indigence. Our aim was to identify what makes someone indigent beyond being recognized by the community as needing a card for free health care.

***Methods***

We used data from a survey conducted to evaluate a State-led intervention for performance-based financing of health services in two districts of Burkina Faso. In 2015, we interviewed 2,077 non-indigents and 1,009 people defined as indigents by their community in 20 villages following a community-based targeting process. Using a classification tree, we built a model that made it possible to select socioeconomic and health characteristics that were likely to distinguish between non-indigents and indigents. We described the screening performance of the tree using data from specific nodes.

***Results***

Widow(er)s under 45 years of age, unmarried people aged 45 years and over, and married women aged 60 years and over were more likely to be identified as indigents by their community. Simple rules based on age, marital status, gender detected indigents with sensitivity of 75.6% and specificity of 55% among those 45 years and over; among those under 45, sensitivity was 85.5% and specificity 92.2%. Combining both tests, sensitivity was 78% and specificity 81%.

***Conclusion***

In its progress toward Universal Health Coverage, Burkina Faso should extend free access to priority health care services to unmarried people and women aged 60 years and over, and services should be adapted to their health needs.

***Ethics consideration***

1  
2  
3  
4  
5  
6  
7  
8  
9  
10  
11  
12  
13  
14  
15  
16  
17  
18  
19  
20  
21  
22  
23  
24  
25  
26  
27  
28  
29  
30  
31  
32  
33  
34  
35  
36  
37  
38  
39  
40  
41  
42  
43  
44  
45  
46  
47  
48  
49  
50  
51  
52  
53  
54  
55  
56  
57  
58  
59  
60

Approval for data collection, storage and release for research purpose has been given by an ethics committee of the Government of Burkina Faso (Decision No. 2013-7-066). Respondent consent was obtained verbally.

For peer review only

## STRENGTHS AND LIMITATIONS OF THIS STUDY

- To our knowledge, this is the first published study that identified those who constitute an indigent population in a Sub-Saharan Africa country;
- The results of the study provide the local authorities in Burkina Faso useful information on populations that need urgent health care coverage;
- This study was limited to certain rural areas in Burkina Faso, further research is needed to assess if these results could be generalize to urban areas;
- Due to lack of data, we could not perform comparative analyses of the characteristics of people with and without missing data in the study.

## INTRODUCTION

Universal health coverage (UHC) has been a key objective for the international community since the call made by the United Nations in 2012. However, given resource constraints, countries must determine their own priorities, and UHC does not mean governments will be able to provide access to all possible health services. High-priority health services should, however, be available to everyone.<sup>(1)</sup> UHC implementation could follow the path of progressive universalism, which involves initially targeting indigents to support them proportionally to their level of disadvantage and offer them high-priority services.<sup>(2)</sup> Targeting social benefits in developing countries has proven challenging.<sup>(3, 4)</sup> More specifically, identifying indigents is a challenge for health care sector reform, particularly in Africa,<sup>(5, 6)</sup> where two processes have been regularly investigated: community-based targeting (CBT) and proxy mean testing (PMT).<sup>(7, 8)</sup> Unlike PMT, there are few studies on CBT in Sub-Saharan Africa. A discussion around these two approaches is beyond the scope of the article. We intend to characterise the subgroup of population that constitute the worst off selected through a community-based targeting approach. In 2007, in Burkina Faso, CBT was tested in a rural district, then in two urban districts and in the National Capital. Under health district leadership, village selection committees produced lists of indigents whom they selected based on a consensual definition and with no pre-determined criteria: “someone who is extremely disadvantaged socially and economically, unable to look after him/herself, and devoid of internal or external resources”. These persons received an official card for free access to health care.<sup>(9)</sup> This CBT was contextually relevant and effective for selecting indigents. However they have also shown, that user fees exemptions are not enough and more is needed to ensure indigents benefit from services.<sup>(10)</sup> Moreover, no study has identified who are those in a state of indigence. Are elderly adults protected informally by their extended families, or do they lack adequate resources to spend on health care in the absence of formal government safety nets and old age pensions? What access do poor women have to health care in societies where men have the decisional power in the family? In a patriarchal society, is being a woman a driver toward indigence?

In this study, our aim was to identify what makes someone an indigent beyond being recognized by his or her community as needing a card for free health care.



## POPULATION AND METHODS

### Setting

An State-led intervention combining performance-based financing (RBF) for health care with user fees exemptions for indigents was implemented in 10 districts in Burkina Faso in 2014. It provided increased financing to health care structures and staff based on quantity and quality of care provided. Higher fee-for-service rates were offered for some services delivered to indigents.<sup>(11)</sup> To identify indigents in each district, a CBT process was implemented in villages concerned by the intervention. In each village, a selection committee developed a list of indigents based on their perception of the definition suggested by Ridde et al.<sup>(8)</sup> This list was validated by an external committee. The World Bank financed this State led program, paying up to 7.2 times more for some consultations for indigents than for those of non-indigents.

In the present study, a community-based selection approach was used to identify the indigents. The study was conducted in 20 villages in two rural districts of Burkina Faso with an agricultural economy: Diébougou (127,857 inhabitants) in the southwest and Gourcy (208,740 inhabitants) in the north. With only four general practitioners and no specialists in both districts, health services use in these areas is very low. In 2014, the average annual number of health visits per inhabitant was 1.03 in Diébougou and 0.73 in Gourcy.<sup>(12)</sup> These districts are different in terms of agricultural practices, weather conditions and ethnic composition. They therefore represent a diversity of rural contexts in Burkina Faso.

### Study sample

Data were collected between February and April 2015, dry season months, when households are more available for interviews than during the agricultural season.

Ten villages were randomly selected in each district; all households that included an indigent as identified by the CBT were included. For comparison, we randomly selected 85% of households without indigence in Diébougou and 45% in Gourcy.

Data were collected on tablets by trained investigators using Open Data Kit (ODK) software. The household questionnaire included modules on household composition,

1  
2  
3 education, assets, and other dimensions. In households including at least one indigent,  
4 an individual health questionnaire survey was administered to the indigent member(s).  
5 In households without an indigent, an individual member was randomly selected and  
6 administered the same individual health questionnaire. Altogether, 2,077 non-indigents  
7 and 1,009 indigents were interviewed in the two districts.  
8  
9  
10

### 11 12 13 14 15 **Study variables**

16  
17 Individual-level variables were selected based on health determinants reported in  
18 previous studies in Africa:<sup>(13-15)</sup>  
19

20  
21 - Demographic characteristics: gender (male, female), age (18–24, 25–34, 35–44, 45–59,  
22 60+), marital status (single, monogamous union or living together, polygamous union,  
23 divorced or separated, widowed);  
24  
25

26  
27 - Socio-economic characteristics: highest level of education (none, primary school,  
28 secondary school); engaging in income-producing activity in the past seven days;  
29 difficulties satisfying food needs; financial constraints making it difficult to buy food, use  
30 the health care centre, or buy medicines;  
31  
32

33  
34 - Health: self-rated health (poor, not poor); self-reported chronic disease; visual  
35 impairment;  
36  
37

38  
39 - Physical functioning: physical disability; limitations in walking 400 metres; upper limb  
40 strength limitations.  
41  
42

### 43 44 45 **Ethics**

46  
47 An ethics committee of the Government of Burkina Faso approved the study (Decision  
48 No. 2013-7-066). Respondent consent was obtained verbally.  
49  
50  
51

## Data sharing

No additional data available.

## Statistical methods

Chi-squared tests were used to compare socio-economic characteristics, health status, and physical functioning of non-indigents and indigents.

To create classification models (IBM SPSS Statistics Version 22), we used the IBM SPSS Decision Trees procedure. Classification and regression tree analysis is a non-parametric exploratory method that partitions the sample using explanatory variables so that segments obtained are as homogenous as possible with regard to the dependent variable.<sup>(16)</sup> Using the Quick Unbiased Efficient Statistical Tree method (QUEST), we built a model that allowed us to select socio-economic, health status, and physical functioning characteristics that were most likely to split non-indigents from indigents. All variables available for this study were specified in the decision tree model. Fourteen were included in the final model procedure: gender, age, highest level of education, marital status, engaging in income-producing activity, financial difficulties (financial constraints making it difficult to buy food or use the health care centre), perceived poor health, chronic disease, visual impairment, disability, ability to walk, and physical strength. Variables that did not contribute significantly were automatically removed from the final model.

The target category was "indigent". For each split, the association between each covariable and the target category was computed using Pearson's chi-square. At each step, the covariable showing the highest association with the target category was selected for splitting.<sup>(17)</sup> When specifying the model, we set an equal cost of misclassification for non-indigents and indigents, the value of alpha for splitting nodes at 0.05, minimum parent node size at 50, and parent node size at 25. We also performed a sensitivity analysis setting a higher cost of misclassification for indigents (twice that for non-indigents). We randomly split the sample into two subsamples (both including non-indigents and indigents), and the models were fitted using the first as a training sample and then testing on the second subsample. Trees were generated to maximum size,

1  
2  
3  
4  
5  
6  
7  
8  
9  
10  
11  
12  
13  
14  
15  
16  
17  
18  
19  
20  
21  
22  
23  
24  
25  
26  
27  
28  
29  
30  
31  
32  
33  
34  
35  
36  
37  
38  
39  
40  
41  
42  
43  
44  
45  
46  
47  
48  
49  
50  
51  
52  
53  
54  
55  
56  
57  
58  
59  
60

where each node contained single-class data or no test offered improvement on the mix of classes at that node, then pruned to avoid over-fitting. We also assessed screening performance of the test tree, using the community-based selection of the indigents as the gold standard.

For peer review only

## RESULTS

### Characteristics of the study population

The analysis sample consisted of 1783 (85.8%) non-indigents and 829 (82.2%) indigents aged 18 years and over with complete information. A total of 294 non-indigents' and 180 indigents' questionnaires were incomplete and excluded from analyses.

Of the total sample population, 1,433 (54.9%) lived in Gourcy, 1,555 (59.5%) were women, and 574 (22.0%) were aged 60 years and over. Most were illiterate (2,312, 88.5%); more than one-third (1004, 38.4%) had difficulties satisfying food needs; 9.4% (246) had difficulties walking 400 metres, and 15.5% (406) perceived their health as poor.

Table 1 presents the study sample characteristics by indigent status. Indigents were more likely to be women, older, illiterate and/or widowed. They were also more likely to be in poor health and to find it financially difficult to cover basic needs.

### Classification of non-indigents and indigents

Figure 1 presents the test tree diagram. Age, marital status, gender, upper limb strength limitations, and financial constraints preventing healthcare centre use and purchase of foodstuffs were the best covariates for separating non-indigents from indigents. All p-values for splitting the nodes were below 0.0001.

We used colour codes to represent tree nodes according to proportions of indigents: red (nodes 3, 9 and 15, with proportions of indigents above 75%); orange (nodes 1, 5, 8, 11, 18, 19, proportions between 50% and 75%); yellow (proportions between 25% and 50%), and green for groups with proportions under 25%. Red nodes (3, 9 and 15) could be used as screening tests with high specificity. Since the first partitioning variable, aged 45 years and over, was so strongly associated with indigence, we developed separate screening schemes for those aged 45 years and over and those under 45.

### Screening performance of the classification tree

1  
2  
3 Among those aged 45 and over, two nodes (3 and 15) had high prevalence of indigence.  
4 Node 3, which comprised those 45 years and over who were unmarried, contained 150  
5 of the total 332 indigents (45%) in that age group. The sensitivity of “being unmarried”  
6 to detect indigence among those 45 years and over was 45% (150/332), and specificity  
7 was 83% (218/264). Node 15, married women aged 60 years and over, had a prevalence  
8 of indigence of 81.6% and could be used to screen for indigence among those 45 years  
9 and over who were married, with sensitivity of 34% (62/182) and specificity of 94%  
10 (204/218). By combining nodes 3 and 15, we obtained a test of indigence among those  
11 45 years and over with sensitivity of 64% and specificity of 77%.  
12  
13  
14  
15  
16  
17  
18

19 Among those under 45, there was only one red node: node 9, being widowed. The  
20 sensitivity of “being widowed” for indigence was 66% (55/83), and specificity was  
21 99.2% (610/615). Combining these two screening criteria, for those 45 years and over  
22 and those under 45, we obtained sensitivity of 64.3% and specificity of 92.6%.  
23  
24  
25  
26

27 Sensitivity could be improved, with a compromise in specificity, by including the orange  
28 nodes in the screening criteria (Table 2). For those aged 45 years and over, screening for  
29 indigence was based on belonging to node 3 (unmarried men and women aged 45 and  
30 over) or node 8 (married women aged 45 and over) with sensitivity of 75.6% (251/332)  
31 and specificity of 55% (145/264). Among those under 45, screening could be based on  
32 belonging to node 5 (unmarried and under 45) or node 11 (under 45 with upper limb  
33 strength limitations), with sensitivity of 85.5% (71/83) and specificity of 92.2%  
34 (567/615).  
35  
36  
37  
38  
39  
40

41 In summary, using simple rules based on easy-to-obtain indicators of marital status and  
42 gender, we were able to detect about 75.6% of indigent subjects among people aged 45  
43 years and over with specificity of 55%, and 85.5% of indigent subjects among those  
44 under 45, with specificity of 92.2%. Combining both tests, we obtained overall  
45 sensitivity of 78% and specificity of 81%.  
46  
47  
48  
49

50 Indigence was largely restricted to being old and unmarried. Indeed, the frequency of  
51 indigence among young people (<45 years) who were married or living with a partner  
52 was only 4.3%.  
53  
54  
55  
56  
57  
58  
59  
60

1  
2  
3 Goodness of fit of the classification tree was evaluated by the index value and the gains  
4 and index charts. The index value of the model was above 100%, the gains chart was  
5 different from the diagonal reference line, and the index chart started above 100%. Risk  
6 of misclassification was 14.8%. Overall percentage of correct classification was 85.2%.  
7  
8 The sensitivity analysis presented in Appendix 1 confirmed that age, gender, and marital  
9 status were strongly correlated with indigence.  
10  
11  
12  
13  
14  
15  
16  
17  
18  
19  
20  
21  
22  
23  
24  
25  
26  
27  
28  
29  
30  
31  
32  
33  
34  
35  
36  
37  
38  
39  
40  
41  
42  
43  
44  
45  
46  
47  
48  
49  
50  
51  
52  
53  
54  
55  
56  
57  
58  
59  
60

For peer review only

## DISCUSSION

Using survey data on individuals in 20 villages of two rural districts in Burkina Faso, we used classification and regression tree methodology to identify best indicators of indigence, as defined by the community. Results showed that being aged 45 years and over, unmarried, and/or a woman were strong indicators of being an indigent, according to the community-based definition. Using simple rules based only on easy-to-obtain indicators of age, marital status and gender, we were able to detect three-quarters of indigents among those aged 45 years and over and six out of seven indigents among those under 45.

Population aging has emerged as a major demographic trend even in low-income countries like Burkina Faso, posing challenges to social institutions.<sup>(18)</sup> With a population estimated at 17.59 million in 2014 and a poverty headcount ratio of 46.7%, Burkina Faso is one of the poorest countries in the world. Life expectancy has increased in recent years, estimated at 58 years for males and 59 for females in 2013.<sup>(19)</sup> To our knowledge, in middle- and low-income countries like Burkina Faso, despite increases in the older adult population generating a greater burden of chronic conditions,<sup>(20)</sup> social and health policies to adapt to the changing age structure are rare. McEniry and McDermott <sup>(21)</sup> describe low-income countries like Burkina Faso as countries where mortality declined rapidly very late in the 20th century. However, in these countries, the health of older cohorts is shaped by survivorship of poor early-life conditions, resulting in early onset of chronic diseases and high prevalence of frailty. Our study showed that aging leads to both poor health and deprivation in Burkina Faso. Roth,<sup>(22)</sup> studying intergenerational relations in Burkina Faso, reported that strength, energy, and therefore the opportunity to earn one's keep decreased with age. Those who cannot participate in reciprocal exchanges of gifts or services risk social marginalization. Yet with no social security<sup>(14, 23)</sup> and without exchange relations, there is no social recognition.

Our study also revealed unmarried people were more likely to be indigents. As marriage in Africa marks the transition to adulthood, single persons are not recognized as adults able to assume responsibilities.<sup>(22)</sup> Marriage confers status and dignity,<sup>(24)</sup> providing individuals with a sense of meaning and of obligation to others, while inhibiting risky



1  
2  
3 behaviours and encouraging healthy ones.<sup>(25)</sup> Previous studies have reported that single,  
4 divorced, or bereaved persons showed higher mortality and morbidity in specific  
5 diseases,<sup>(26, 27)</sup> as well as lower quality of life<sup>(28)</sup> compared with those who were married  
6 or cohabiting. The differences between married and unmarried people may reflect not  
7 only a causal effect of marriage but also a selection effect: healthier people may be more  
8 likely than others to find mates and marry.<sup>(29)</sup>

13  
14 Widows across the globe share two common experiences: loss of social status and  
15 reduced economic circumstances.<sup>(30)</sup> In developed countries, widowhood is experienced  
16 primarily by elderly women, while in developing countries it also affects younger  
17 women, many of whom are still rearing children. Widowers, even when elderly, are far  
18 more likely to remarry,<sup>(31)</sup> but this is not the case for widows, who, if they do remarry,  
19 rarely do so of their own free will. As a result, many women spend a long period of their  
20 lives in widowhood, with all its associated disadvantages and stigmas.<sup>(30)</sup> In fact, the  
21 association between widowhood and being in the poorest household wealth quintile  
22 was consistent across countries (China, Ghana, India, the Russian Federation and South  
23 Africa).<sup>(32)</sup> In Burkina Faso, the sociocultural context is still marked by beliefs and  
24 practices leading to discrimination against women, particularly older women, including  
25 widow inheritance, forced marriage, and social exclusion of women for witchcraft  
26 allegations. Belief in witchcraft is more dominant in rural areas, where poverty usually  
27 leads to strained human and in-law relations, and where most illnesses cannot be  
28 explained.<sup>(33)</sup> Women victims of such violence and discrimination are mostly seniors,  
29 have had no children or only girls, have emigrated, or their children have not  
30 "succeeded". They are widowed or postmenopausal, poor, and uneducated.<sup>(34)</sup> In our  
31 study, women who were indigents were likely to carry health consequences of their  
32 reproductive history. After surviving adolescent childbirth and multiparity, they were at  
33 high risk of lower physical performance,<sup>(35)</sup> chronic diseases, incontinence <sup>(36)</sup> or  
34 fistula.<sup>(37)</sup> Supporting this line of evidence, Doulougou et al. <sup>(31)</sup> reported that widows in  
35 Burkina Faso were more vulnerable to hypertension than married women of similar age,  
36 education and health behaviours.

53  
54 The classification tree showed that even married women, if aged 60 years and over,  
55 were more likely to be indigents. Power inequalities in gender relationships, affecting  
56  
57

1  
2  
3 access to resources and decision-making on sexual and reproductive issues, are frequent  
4 in West African societies.<sup>(38)</sup> Harmful cultural practices, such as widow cleansing, son  
5 preference, and others, remain threats to women's health and well-being.<sup>(39)</sup> Onadja et  
6 al. reported that being a woman was positively associated with higher odds of cognitive  
7 impairment and mobility disability in Burkina Faso, and the size of associations  
8 appeared insensitive to adjustment for various life-course socioeconomic and health  
9 conditions.<sup>(40)</sup> Females make up an increasing proportion of the world's poor.<sup>(41)</sup> This  
10 situation is exacerbated by age and marital status, as shown in this research.

11  
12  
13  
14  
15  
16 Potential limitations of this study include the fact that the results may not be  
17 representative to urban areas in Burkina Faso because the study targeted only certain  
18 rural areas. Moreover, self-reported health included in this study may say more about  
19 health awareness, health expectations and overall life satisfaction than about health per  
20 se, especially in a poor population with little engagement with services.  
21  
22  
23  
24  
25

### 26 **Policy implications**

27  
28 The way the State is organized often exacerbates existing social cleavages, intensifying  
29 inequalities between rich and poor. For many vulnerable groups, such as older adults,  
30 unmarried adults, and widowed women, changes over the past decade have eroded  
31 important social safety networks and practices. Targeting the poorest for free access to  
32 health care or financial assistance has emerged as an alternative to UHC in many  
33 developing countries. Such targeting requires effective selection strategies. Our results  
34 show that, following a CBT process, three groups compose the indigent population in  
35 rural Burkina Faso: widow(er)s under 45, unmarried people aged 45 years and over,  
36 and married women aged 60 years and over. Using the country's 2014 Demographic  
37 Health Survey data, we selected and described these groups and found they represented  
38 1% of the total population under 45, 23% of those aged 45 and over, and 45% of people  
39 aged 60 and over. Impact and/or cost-effectiveness analyses are needed to confirm that  
40 our policy suggestions could be implemented. The ability for the local government to  
41 support and sustain these programs must also be assessed.  
42  
43  
44  
45  
46  
47  
48  
49  
50  
51  
52

53  
54 In its progress toward UHC, the government of Burkina Faso has implemented, since  
55 April 2, 2016, free access to maternal and child health care. However, as reported here,  
56  
57  
58  
59  
60

1  
2  
3 there are other vulnerable groups with poor health and limited access to health services.  
4 Health care in Burkina Faso should include high-priority services to unmarried people  
5 and those aged 45 years and over (like in Senegal, where elderly people have free access  
6 to health care),<sup>(42)</sup> particularly widow(er)s and older women, and be adapted to their  
7 health needs, including chronic diseases. Extending free access to health care services to  
8 these vulnerable populations living in the rural areas may be a pertinent public health  
9 intervention.  
10  
11  
12  
13  
14

### 17 **Conclusion**

18 Using an original study method, this research sheds light on indigence by providing the  
19 characteristics of indigents as perceived by their own communities. Indigence is rare  
20 among the married population under 45 and frequent among unmarried adults and  
21 older adults, particularly widows(er)s and older women. Indigent people reported  
22 poorer health, chronic disease, and limitations in physical functioning. This implies that  
23 patient-centred health care for indigent people must take into account age and gender,  
24 and the management of chronic conditions.  
25  
26  
27  
28  
29  
30  
31  
32  
33  
34  
35  
36  
37  
38  
39  
40  
41  
42  
43  
44  
45  
46  
47  
48  
49  
50  
51  
52  
53  
54  
55  
56  
57  
58  
59  
60

### **AUTHORS' CONTRIBUTIONS**

Samiratou Ouédraogo performed the statistical analysis, interpreted the results, reviewed the literature, and prepared the manuscript.

Valéry Ridde was involved in conception of the study design, data collection, statistical analysis, interpretation of results, literature review, and manuscript preparation.

Nicole Atchessi was involved in conception of the study design, data collection, and manuscript preparation.

Aurélia Souares was involved in conception of the study design, data collection, and manuscript preparation.

Jean-Louis Koulidiati was involved in conception of the study design, data collection, and manuscript preparation.

Quentin Stoeffler participated in conception of the study design, data collection, and manuscript preparation.

Zunzunegui Maria-Victoria was involved in conception of the study design, statistical analysis, interpretation of results, literature review, and manuscript preparation.

All authors read and approved the final manuscript.

**FUNDING STATEMENT**

The “African Region Multi-Donor Trust Fund on Poverty and Social Impact Analysis (PSIA)” funded data collection for this study. The World Bank and the Canadian Institutes of Health Research (CIHR) through the project “Community research studies and interventions for health equity in Burkina Faso” (Grant number ROH-115213) funded statistical analysis, interpretation and manuscript preparation. Valéry Ridde holds a CIHR-funded Research Chair in Applied Public Health (CPP 137901). The University of Montréal Public Health Research Institute (IRSPUM) supported the costs related to the editing of the present manuscript.

The funding body did not play any role in study design; analysis; interpretation of data; writing of the manuscript and the decision to submit it for publication.

## ACKNOWLEDGEMENTS

We thank Anne-Marie Turcotte-Tremblay and Donna Riley for assistance in the editing of the manuscript.

We thank Yamba Kafando, Jake Robin, Haidara Ousmane Diadie, and Philippe Compaoré for their assistance during the study.

We thank the research NGO “AGIR” and its staff for conducting the interviews.

We thank “SERSAP” for coordinating the selection of indigents by the communities.

We thank the Demographic and Health Surveys (DHS) Program for providing Burkina Faso’s 2014 DHS data.

## COMPETING INTERESTS

We declare that we have no conflicts of interest.

For peer review only

## TABLES

Table 1: Comparison of socio-economic characteristics and health status between non-indigents and indigents

| Variables                                  | Total Number | Non-indigents |            | Indigents  |            | P value |
|--------------------------------------------|--------------|---------------|------------|------------|------------|---------|
|                                            |              | Number        | Percentage | Number     | Percentage |         |
|                                            |              | <b>1783</b>   |            | <b>829</b> |            |         |
| <b>District</b>                            |              |               |            |            |            | <0.0001 |
| Diébougou                                  | 1179         | 631           | 35.4       | 548        | 66.1       |         |
| Gourcy                                     | 1433         | 1152          | 64.6       | 281        | 33.9       |         |
| <b>Gender</b>                              |              |               |            |            |            | <0.0001 |
| Male                                       | 1057         | 802           | 45.0       | 255        | 30.8       |         |
| Female                                     | 1555         | 981           | 55.0       | 574        | 69.2       |         |
| <b>Age (years)</b>                         |              |               |            |            |            | <0.0001 |
| 18–24                                      | 368          | 364           | 20.4       | 4          | 0.5        |         |
| 25–34                                      | 555          | 524           | 29.4       | 31         | 3.7        |         |
| 35–44                                      | 457          | 328           | 18.4       | 129        | 15.6       |         |
| 45–59                                      | 658          | 333           | 18.4       | 325        | 39.2       |         |
| 60+                                        | 574          | 234           | 13.1       | 340        | 41.0       |         |
| <b>Highest level of education achieved</b> |              |               |            |            |            | <0.0001 |
| None                                       | 2312         | 1522          | 85.4       | 790        | 95.3       |         |



|                                                                |      |      |      |     |      |         |
|----------------------------------------------------------------|------|------|------|-----|------|---------|
| Primary school                                                 | 213  | 188  | 10.5 | 25  | 3.0  |         |
| Secondary school                                               | 87   | 73   | 4.1  | 14  | 1.7  |         |
| <b>Marital status</b>                                          |      |      |      |     |      | <0.0001 |
| Single                                                         | 111  | 68   | 3.8  | 43  | 5.2  |         |
| Monogamous union or living together                            | 1308 | 1035 | 58.0 | 273 | 32.9 |         |
| Polygamous union                                               | 715  | 562  | 31.5 | 153 | 18.5 |         |
| Divorced or separated                                          | 25   | 8    | 0.4  | 17  | 2.1  |         |
| Widowed                                                        | 453  | 110  | 6.2  | 343 | 41.4 |         |
| <b>Engaged in income-producing activity in the past 7 days</b> |      |      |      |     |      | <0.0001 |
| No                                                             | 2044 | 1344 | 75.4 | 700 | 84.4 |         |
| Yes                                                            | 568  | 439  | 24.6 | 129 | 15.6 |         |
| <b>Difficulties satisfying food needs</b>                      |      |      |      |     |      | <0.0001 |
| No                                                             | 1608 | 1219 | 68.4 | 389 | 46.9 |         |
| Yes                                                            | 1004 | 564  | 31.6 | 440 | 53.1 |         |
| <b>Financial difficulties that prevent buying foodstuffs</b>   |      |      |      |     |      | <0.0001 |
| No                                                             | 1561 | 1210 | 67.9 | 351 | 42.3 |         |
| Yes                                                            | 1051 | 573  | 32.1 | 478 | 57.7 |         |

|    |                                            |      |      |      |     |      |         |
|----|--------------------------------------------|------|------|------|-----|------|---------|
| 1  |                                            |      |      |      |     |      |         |
| 2  |                                            |      |      |      |     |      |         |
| 3  |                                            |      |      |      |     |      |         |
| 4  |                                            |      |      |      |     |      |         |
| 5  | <b>Financial difficulties that prevent</b> |      |      |      |     |      |         |
| 6  | <b>going to the health care centre</b>     |      |      |      |     |      | <0.0001 |
| 7  |                                            |      |      |      |     |      |         |
| 8  | No                                         | 1553 | 1250 | 70.1 | 303 | 36.6 |         |
| 9  | Yes                                        | 1059 | 533  | 29.9 | 526 | 63.4 |         |
| 10 |                                            |      |      |      |     |      |         |
| 11 | <b>Financial difficulties that</b>         |      |      |      |     |      |         |
| 12 | <b>prevent buying medicines</b>            |      |      |      |     |      | <0.0001 |
| 13 |                                            |      |      |      |     |      |         |
| 14 | No                                         | 1610 | 1280 | 71.8 | 330 | 39.8 |         |
| 15 | Yes                                        | 1002 | 503  | 28.2 | 499 | 60.2 |         |
| 16 |                                            |      |      |      |     |      |         |
| 17 | <b>Perceived poor health</b>               |      |      |      |     |      | <0.0001 |
| 18 |                                            |      |      |      |     |      |         |
| 19 | No                                         | 2206 | 1629 | 91.4 | 577 | 69.6 |         |
| 20 | Yes                                        | 406  | 154  | 8.6  | 252 | 30.4 |         |
| 21 |                                            |      |      |      |     |      |         |
| 22 | <b>Chronic disease</b>                     |      |      |      |     |      | <0.0001 |
| 23 |                                            |      |      |      |     |      |         |
| 24 | No                                         | 1592 | 1243 | 69.7 | 349 | 42.1 |         |
| 25 | Yes                                        | 1020 | 540  | 30.3 | 480 | 57.9 |         |
| 26 |                                            |      |      |      |     |      |         |
| 27 | <b>Disability</b>                          |      |      |      |     |      | <0.0001 |
| 28 |                                            |      |      |      |     |      |         |
| 29 | No                                         | 2297 | 1679 | 94.2 | 618 | 74.5 |         |
| 30 | Yes                                        | 315  | 104  | 5.8  | 211 | 25.5 |         |
| 31 |                                            |      |      |      |     |      |         |
| 32 | <b>Perceived limitations in ability</b>    |      |      |      |     |      | <0.0001 |
| 33 | <b>to walk 400m</b>                        |      |      |      |     |      |         |
| 34 |                                            |      |      |      |     |      |         |
| 35 | No                                         | 2366 | 1702 | 95.5 | 664 | 80.1 |         |
| 36 |                                            |      |      |      |     |      |         |
| 37 |                                            |      |      |      |     |      |         |
| 38 |                                            |      |      |      |     |      |         |
| 39 |                                            |      |      |      |     |      |         |
| 40 |                                            |      |      |      |     |      |         |
| 41 |                                            |      |      |      |     |      |         |
| 42 |                                            |      |      |      |     |      |         |
| 43 |                                            |      |      |      |     |      |         |
| 44 |                                            |      |      |      |     |      |         |
| 45 |                                            |      |      |      |     |      |         |
| 46 |                                            |      |      |      |     |      |         |
| 47 |                                            |      |      |      |     |      |         |
| 48 |                                            |      |      |      |     |      |         |
| 49 |                                            |      |      |      |     |      |         |

|    |                                                     |      |      |      |     |      |         |
|----|-----------------------------------------------------|------|------|------|-----|------|---------|
| 5  | Yes                                                 | 246  | 81   | 4.5  | 165 | 19.9 |         |
| 7  | <b>Perceived limitations in upper limb strength</b> |      |      |      |     |      | <0.0001 |
| 9  | No                                                  | 2282 | 1697 | 95.2 | 585 | 70.6 |         |
| 11 | Yes                                                 | 330  | 86   | 4.8  | 244 | 29.4 |         |
| 12 | <b>Visual impairment</b>                            |      |      |      |     |      | 0.4     |
| 14 | No                                                  | 2560 | 1745 | 97.9 | 815 | 98.3 |         |
| 15 | Yes                                                 | 52   | 38   | 2.1  | 14  | 1.7  |         |

**Table 2: Screening performance of the test tree**

| Characteristics                 | Test tree nodes                    | Sensitivity    | Specificity    | Positive predictive value | Negative predictive value |
|---------------------------------|------------------------------------|----------------|----------------|---------------------------|---------------------------|
| <b>Under 45</b>                 | Red node (9)                       | 0.66 (55/83)   | 0.99 (610/615) | 0.92 (55/60)              | 0.96 (610/638)            |
|                                 | Red and orange nodes (5, 11)       | 0.86 (71/83)   | 0.92 (567/615) | 0.60 (71/119)             | 0.98 (567/579)            |
| <b>45 years of age and over</b> | Red nodes (3, 15)                  | 0.64 (212/332) | 0.77 (204/264) | 0.78 (212/272)            | 0.63 (204/324)            |
|                                 | Red and orange nodes (3, 8)        | 0.76 (251/332) | 0.55 (145/264) | 0.68 (251/370)            | 0.64 (145/226)            |
| <b>All ages</b>                 | Red nodes (3, 9, 15)               | 0.64 (267/415) | 0.93 (814/879) | 0.80 (267/332)            | 0.85 (814/962)            |
|                                 | Red and orange nodes (3, 5, 8, 11) | 0.78 (322/415) | 0.81 (712/879) | 0.66 (322/489)            | 0.88 (712/805)            |

Data are percentages, with numbers of patients in parentheses:

- Sensitivity in under 45 was 66% (red node) = (Total indigents in node 9) / (Total indigents in this age group; node 2) x 100;

- Specificity in all ages was 81% (red and orange nodes) = [(Total non-indigents in node 1) - (Total non-indigents in nodes 3 and 8)] + [(Total non-indigents in node 2) - (Total non-indigents in nodes 5 and 11)] / total non-indigents in all ages groups (nodes 1 and 2) x 100;

- Positive predictive value in all ages was 80% (red nodes 3, 9, and 15) = (Total indigents in red nodes 3, 9, and 15) / (Total non-indigent and indigents in red nodes 3, 9, and 15) x 100.

1  
2  
3  
4  
5 - Negative predictive value in under 45 was 98% (red and orange nodes) =  $\frac{[(\text{Total non-indigents in node 2}) - (\text{Total non-indigents in nodes 5 and 11})]}{[(\text{Total indigents in node 2} - \text{Total indigents in nodes 5 and 11}) + (\text{Total non-indigents in node 2} - \text{Total non-indigents in nodes 5 and 11})]} \times 100$ .

For peer review only

1  
2  
3 **REFERENCE LIST**  
4

- 5 1. Chan M. Making Fair Choices on the Path to Universal Health Coverage. *Health*  
6 *Systems & Reform*. 2016;2(1):7.
- 7 2. Nicholson D, Yates R, Warburton W, Fontana G. Delivering universal health  
8 coverage: a guide for policymakers. Report of the WISH Universal Health Coverage  
9 Forum 2015. WISH Partners, 2015 [cited 2016 May 20]. Available from:  
10 [https://www.imperial.ac.uk/media/imperial-college/institute-of-global-health-](https://www.imperial.ac.uk/media/imperial-college/institute-of-global-health-innovation/public/Universal-health-coverage.pdf)  
11 [innovation/public/Universal-health-coverage.pdf](https://www.imperial.ac.uk/media/imperial-college/institute-of-global-health-innovation/public/Universal-health-coverage.pdf)
- 12 3. Ellis F. 'We are all poor here': economic difference, social divisiveness and  
13 targeting cash transfers in Sub-Saharan Africa. *J Dev Stud*. 2012;48(2):201-14.
- 14 4. Stoeffler Q, Mills B, del Ninno C. Reaching the poor: cash transfer program targeting  
15 in Cameroon. *World Dev*. 2016;83:244-63.
- 16 5. Ridde V. "The problem of the worst-off is dealt with after all other issues": the  
17 equity and health policy implementation gap in Burkina Faso. *Soc Sci Med*.  
18 2008;66(6):1368-78.
- 19 6. Atchessi N, Ridde V, Zunzunegui MV. Is the process for selecting indigents to  
20 receive free care in Burkina Faso equitable? *BMC Public Health*. 2014;14:1158.
- 21 7. Conning J, Kevane M. Community based targeting mechanisms for social safety  
22 nets: a critical review. *World Dev*. 2002;30:375-94.
- 23 8. Hanson K, Worrall E, Wiseman V. Targeting services towards the poor: a review  
24 of targeting mechanisms and their effectiveness. In: Bennett S, Gilson L, Mills A, editors.  
25 *Health, economic development and household poverty: from understanding to action*.  
26 London: Routledge; 2007. p. 134-54.
- 27 9. Ridde V, Yaogo M, Kafando Y, Sanfo O, Coulibaly N, Nitiema PA, et al. A  
28 community-based targeting approach to exempt the worst-off from user fees in Burkina  
29 Faso. *J Epidemiol Community Health*. 2010;64(1):10-5.
- 30 10. Atchessi N, Ridde V, Zunzunegui MV. User fees exemptions alone are not enough  
31 to increase indigent use of healthcare services. *Health Policy Plan*. 2016.
- 32 11. Ridde V, Turcotte-Tremblay AM, Souares A, Lohmann J, Zombre D, Koulidiati JL, et  
33 al. Protocol for the process evaluation of interventions combining performance-based  
34 financing with health equity in Burkina Faso. *Implement Sci*. 2014;9:149.
- 35 12. Ministère de la santé du Burkina Faso. *Annuaire statistique 2014*. Ouagadougou:  
36 Direction générale des études et des statistiques sectorielles; 2015.
- 37 13. Onadja Y, Bignami S, Rossier C, Zunzunegui MV. The components of self-rated  
38 health among adults in Ouagadougou, Burkina Faso. *Popul Health Metr*. 2013;11:15.
- 39 14. Badini-Kinda F. The gap between ideas and practices: elderly social insecurity in  
40 rural Burkina Faso / L'écart entre idées et pratiques : l'insécurité sociale des personnes  
41 âgées en milieu rural burkinabé. In: de Jong W, Roth C, Badini-Kinda F, Bhagyanath S,  
42 editors. *Ageing in insecurity: case studies on social security and gender in India and*  
43 *Burkina Faso / Vieillir dans l'insécurité: sécurité sociale et genre en Inde et au Burkina*  
44 *Faso: études de cas*. Piscataway, NJ: Transaction Publishers; 2005. p. 139-66, 323-51.
- 45 15. Walker JA. Early marriage in Africa--trends, harmful effects and interventions. *Afr*  
46 *J Reprod Health*. 2012;16(2):231-40.
- 47 16. Valmy L, Gontier B, Parriault MC, Van Melle A, Pavlovsky T, Basurko C, et al.  
48 Prevalence and predictive factors for renouncing medical care in poor populations of  
49 Cayenne, French Guiana. *BMC Health Serv Res*. 2016;16:34.

17. Rokach L, Maimon O. Top-down induction of decision trees classifiers – a survey. *IEEE Trans Syst Man Cybern.* 2002;1(11):12.
18. Kinsella K, He W. An aging world: 2008. International population reports. Washington, DC: U.S. Government Printing Office; 2009. Contract No.: P95/09-1.
19. The World Bank. Burkina Faso. 2016 [cited 2016 03 March]; Available from: <http://data.worldbank.org/country/burkina-faso>.
20. Oizumi K, Kajiwara H, Aratame N. Facing up to the problem of population aging in developing countries: new perspectives for assistance and cooperation. Tokyo: Institute for International Cooperation, Japan International Cooperation Agency (JICA); 2006.
21. McEniry M, McDermott J. Early-Life Conditions, Rapid Demographic Changes, and Older Adult Health in the Developing World. *Biodemography Soc Biol.* 2015;61(2):147-66.
22. Roth C. Les relations intergénérationnelles sous pression au Burkina Faso. *Autrepart: Vieillir au Sud.* 2010;95-110. doi: 10.3917/autr.053.0095
23. Roth C. Threatening dependency: limits of social security. Old age and gender in urban Burkina Faso / Dépendance menaçante : limites de la sécurité sociale, vieil âge et genre en milieu urbain burkinabé. In: de Jong W, Roth C, Badini-Kinda F, Bhagyanath S, editors. *Ageing in insecurity: case studies on social security and gender in India and Burkina Faso / Vieillir dans l'insécurité: sécurité sociale et genre en Inde et au Burkina Faso: études de cas.* Piscataway, NJ: Transaction Publishers; 2005. p. 107-37, 289-322.
24. Kyalo P. A Reflection on the African Traditional Values of Marriage and Sexuality. *International Journal of Academic Research in Progressive Education and Development.* 2012;1(2):219.
25. Waite L, Gallagher M. The case for marriage: why married people are happier, healthier and better off financially. New York: Broadway Books; 2000.
26. Joung IM, van de Mheen H, Stronks K, van Poppel FW, Mackenbach JP. Differences in self-reported morbidity by marital status and by living arrangement. *Int J Epidemiol.* 1994;23(1):91-7.
27. Hu YR, Goldman N. Mortality differentials by marital status: an international comparison. *Demography.* 1990;27(2):233-50.
28. Han KT, Park EC, Kim JH, Kim SJ, Park S. Is marital status associated with quality of life? *Health Qual Life Outcomes.* 2014;12:109.
29. Bramlett MD, Mosher WD. Cohabitation, marriage, divorce, and remarriage in the United States. *Vital Health Stat* 23. 2002(22):1-93.
30. United Nations. *Widowhood: invisible women, secluded or excluded.* New York: United Nations Division for the Advancement of Women; 2001 [cited 2016 May 20]. Available from: [http://www.un.org/womenwatch/daw/public/wom\\_Dec%2001%20single%20pg.pdf](http://www.un.org/womenwatch/daw/public/wom_Dec%2001%20single%20pg.pdf)
31. Doulogou B, Kouanda S, Rossier C, Soura A, Zunzunegui MV. Differences in hypertension between informal and formal areas of Ouagadougou, a sub-Saharan African city. *BMC Public Health.* 2014;14:893.
32. Lloyd-Sherlock P, Corso B, Minicuci N. Widowhood, Socio-Economic Status, Health and Wellbeing in Low and Middle-Income Countries. *J Dev Stud.* 2015;51(10):1374-1388.
33. Meel BL. Witchcraft in Transkei Region of South African: case report. *Afr Health Sci.* 2009;9(1):64.

- 1  
2  
3 34. Nebie-Zoma DS [Internet]. L'exclusion sociale pour allégation de sorcellerie, une  
4 violence faites aux femmes. 2014 [cited 2016 May 20]. Available from:  
5 <http://www.genreenaction.net/L-exclusion-sociale-pour-allegation-de.html>.  
6  
7 35. Câmara SMA, Pirkle C, Moreira MA, Vieira MCa, Vafaei A, Maciel ÁCC. Early  
8 maternal age and multiparity are associated to poor physical performance in middle-  
9 aged women from Northeast Brazil: a cross-sectional community based study. BMC  
10 Womens Health. 2015;15:56.  
11 36. Kepenekci I, Keskinilic B, Akinsu F, Cakir P, Elhan AH, Erkek AB, et al. Prevalence  
12 of pelvic floor disorders in the female population and the impact of age, mode of  
13 delivery, and parity. Dis Colon Rectum. 2011;54(1):85–94.  
14 37. Maheu-Giroux M, Filippi V, Maulet N, Samadoulougou S, Castro MC, Meda N, et al.  
15 Risk factors for vaginal fistula symptoms in Sub-Saharan Africa: a pooled analysis of  
16 national household survey data. BMC Pregnancy Childbirth. 2016;16(1):82.  
17 38. Sen G, Östlin P, George A. Unequal, unfair, ineffective and inefficient gender  
18 inequity in health: why it exists and how we can change it. Final report to the WHO  
19 Commission on Social Determinants of Health, September 2007. Geneva: World Health  
20 Organization, Women and Gender Equity Knowledge Network; 2007.  
21 39. Durojaye E. 'Woman, but not human': widowhood practices and human rights  
22 violations in Nigeria. International Journal of Law Policy and the Family. 2013;27(2).  
23 Epub 196.  
24 40. Onadja Y, Atchessi N, Soura BA, Rossier C, Zunzunegui MV. Gender differences in  
25 cognitive impairment and mobility disability in old age: a cross-sectional study in  
26 Ouagadougou, Burkina Faso. Arch Gerontol Geriatr. 2013;57(3):311–8.  
27 41. Moghadam MV. The 'feminization of poverty' and women's human rights. Paris:  
28 UNESCO, Division of Human Rights, Gender Equality and Development Section; 2005.  
29 42. Mbacké Leye MMM, Diongue M; Faye A; Coumé M; Faye A; Tall AB; Niang N; Wone  
30 I; Seck I; Ndiaye P; Tal-Dia A;. Analyse du fonctionnement du plan de prise en charge  
31 gratuite des soins chez les personnes âgées « Plan Sésame » au Sénégal. Santé Publique.  
32 2013;25:106.  
33  
34  
35  
36  
37  
38  
39  
40  
41  
42  
43  
44  
45  
46  
47  
48  
49  
50  
51  
52  
53  
54  
55  
56  
57  
58  
59  
60



Figure 1: Test tree diagram

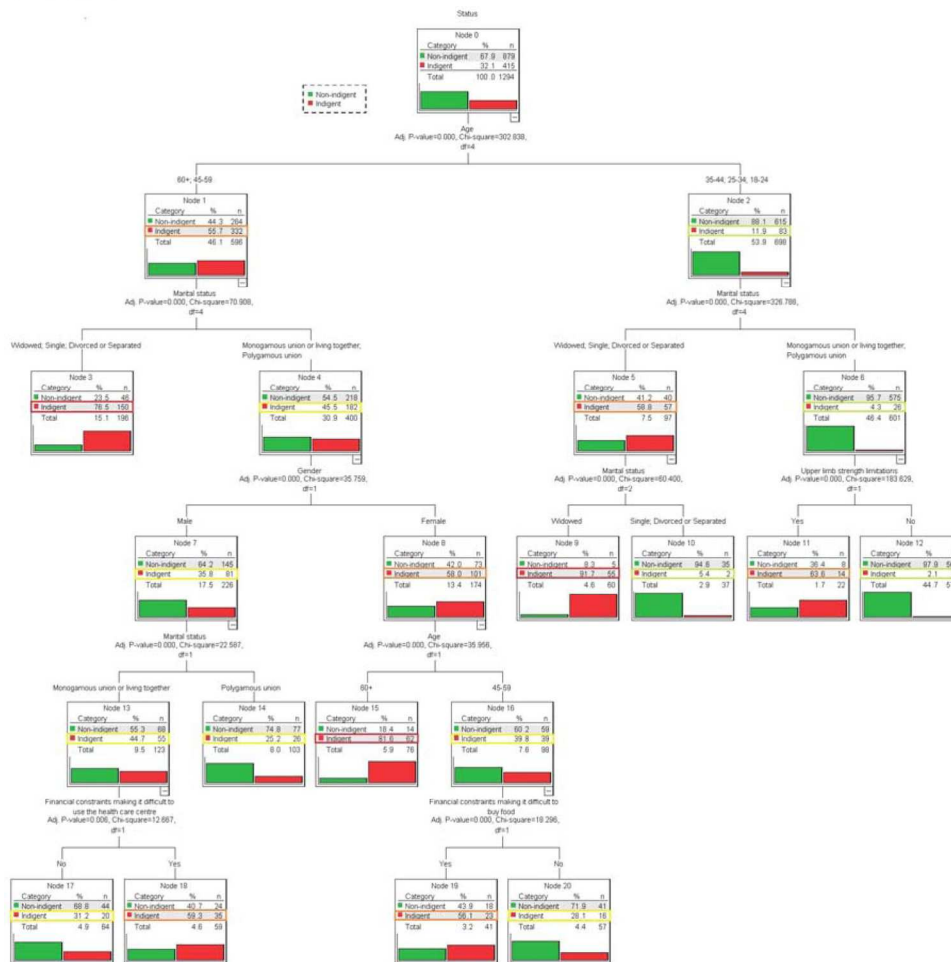

Test tree diagram

159x162mm (300 x 300 DPI)

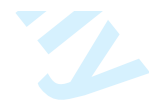

APPENDIX 1: sensitivity analysis

Results of the test tree, where the cost of misclassifying indigents as non-indigents was set to be twice the cost of misclassifying non-indigents as indigents. The value of alpha for splitting nodes was set at 0.05, minimum parent node size at 50, and percent node size at 25. The index value and the gains and index charts indicate the classification was good. The index value of the model was greater than 100%, the gain chart was different from the diagonal reference line, and the index chart started above 100%. The risk of misclassification was 20.9%. The overall percentage of correct classification was 83.4%, and 86.5% of indigents were accurately classified by the model.

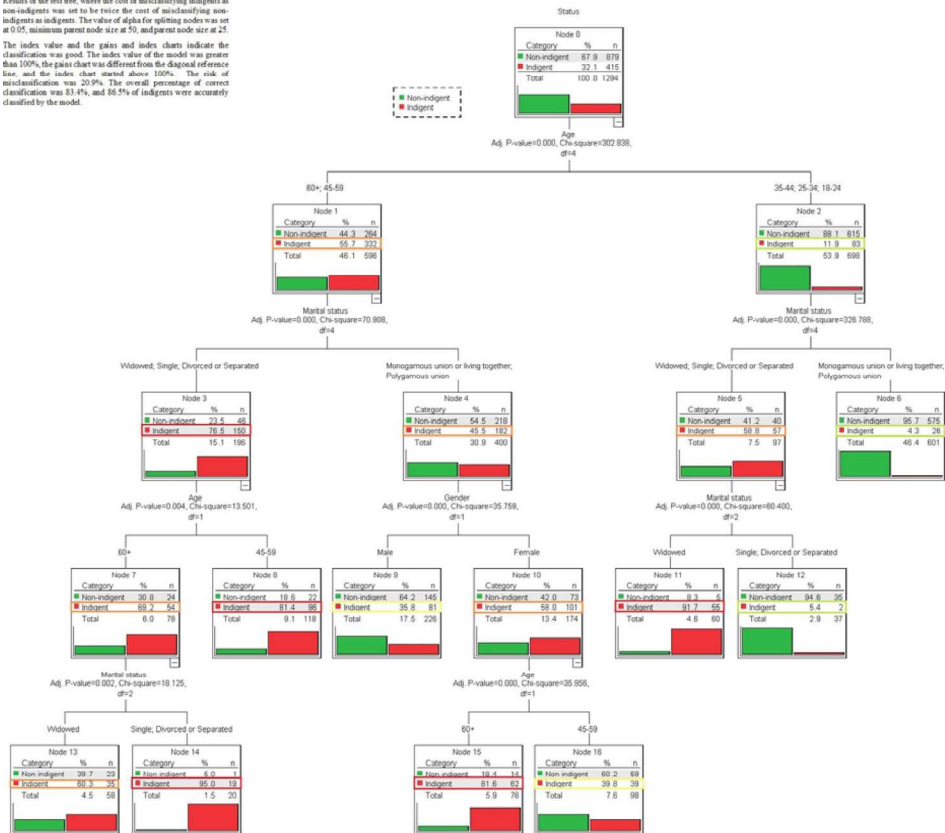

Sensitivity analysis

159x143mm (300 x 300 DPI)

Only

**STROBE Statement—Checklist of items that should be included in reports of cross-sectional studies**

|                              | <b>Item No</b> | <b>Recommendation</b>                                                                                                                    | <b>Page</b> |
|------------------------------|----------------|------------------------------------------------------------------------------------------------------------------------------------------|-------------|
| <b>Title and abstract</b>    | 1              | (a) Indicate the study's design with a commonly used term in the title or the abstract                                                   | 1           |
|                              |                | (b) Provide in the abstract an informative and balanced summary of what was done and what was found                                      | 2           |
| <b>Introduction</b>          |                |                                                                                                                                          |             |
| Background/rationale         | 2              | Explain the scientific background and rationale for the investigation being reported                                                     | 5           |
| Objectives                   | 3              | State specific objectives, including any prespecified hypotheses                                                                         | 5           |
| <b>Methods</b>               |                |                                                                                                                                          |             |
| Study design                 | 4              | Present key elements of study design early in the paper                                                                                  | 6           |
| Setting                      | 5              | Describe the setting, locations, and relevant dates, including periods of recruitment, exposure, follow-up, and data collection          | 6           |
| Participants                 | 6              | (a) Give the eligibility criteria, and the sources and methods of selection of participants                                              | 6           |
| Variables                    | 7              | Clearly define all outcomes, exposures, predictors, potential confounders, and effect modifiers. Give diagnostic criteria, if applicable | 7           |
| Data sources/<br>measurement | 8*             | For each variable of interest, give sources of data and details of methods of assessment (measurement).                                  | 7           |

1  
2  
3 Describe comparability of assessment methods if there  
4 is more than one group  
5  
6

|                           |     |                                                                                                                                                                                                                     |               |
|---------------------------|-----|---------------------------------------------------------------------------------------------------------------------------------------------------------------------------------------------------------------------|---------------|
| 7 Bias                    | 9   | Describe any efforts to address potential sources of<br>8 bias                                                                                                                                                      |               |
| 10 Study size             | 10  | Explain how the study size was arrived at                                                                                                                                                                           | 10            |
| 13 Quantitative variables | 11  | Explain how quantitative variables were handled in the<br>14 analyses. If applicable, describe which groupings were<br>15 chosen and why                                                                            | 8             |
| 18 Statistical methods    | 12  | (a) Describe all statistical methods, including those<br>20 used to control for confounding                                                                                                                         | 8             |
|                           |     | (b) Describe any methods used to examine subgroups<br>23 and interactions                                                                                                                                           | NA            |
|                           |     | (c) Explain how missing data were addressed                                                                                                                                                                         |               |
|                           |     | (d) If applicable, describe analytical methods taking<br>29 account of sampling strategy                                                                                                                            | 8             |
|                           |     | (e) Describe any sensitivity analyses                                                                                                                                                                               | 12 &<br>34 28 |
| <b>Results</b>            |     |                                                                                                                                                                                                                     |               |
| 39 Participants           | 13* | (a) Report numbers of individuals at each stage of<br>40 study—eg numbers potentially eligible, examined for<br>41 eligibility, confirmed eligible, included in the study,<br>42 completing follow-up, and analysed | 10            |
|                           |     | (b) Give reasons for non-participation at each stage                                                                                                                                                                |               |
|                           |     | (c) Consider use of a flow diagram                                                                                                                                                                                  |               |
| 51 Descriptive data       | 14* | (a) Give characteristics of study participants (eg<br>52 demographic, clinical, social) and information on<br>53 exposures and potential confounders                                                                | 10            |

(b) Indicate number of participants with missing data for each variable of interest

|                          |     |                                                                                                                                                                                                              |         |
|--------------------------|-----|--------------------------------------------------------------------------------------------------------------------------------------------------------------------------------------------------------------|---------|
| Outcome data             | 15* | Report numbers of outcome events or summary measures                                                                                                                                                         | 21      |
| Main results             | 16  | (a) Give unadjusted estimates and, if applicable, confounder-adjusted estimates and their precision (eg, 95% confidence interval). Make clear which confounders were adjusted for and why they were included | NA      |
|                          |     | (b) Report category boundaries when continuous variables were categorized                                                                                                                                    | NA      |
|                          |     | (c) If relevant, consider translating estimates of relative risk into absolute risk for a meaningful time period                                                                                             | NA      |
| Other analyses           | 17  | Report other analyses done—eg analyses of subgroups and interactions, and sensitivity analyses                                                                                                               | NA      |
| <b>Discussion</b>        |     |                                                                                                                                                                                                              |         |
| Key results              | 18  | Summarise key results with reference to study objectives                                                                                                                                                     | 10 & 11 |
| Limitations              | 19  | Discuss limitations of the study, taking into account sources of potential bias or imprecision. Discuss both direction and magnitude of any potential bias                                                   | 17      |
| Interpretation           | 20  | Give a cautious overall interpretation of results considering objectives, limitations, multiplicity of analyses, results from similar studies, and other relevant evidence                                   | 15-17   |
| Generalisability         | 21  | Discuss the generalisability (external validity) of the study results                                                                                                                                        | 15      |
| <b>Other information</b> |     |                                                                                                                                                                                                              |         |

1  
2  
3  
4  
5  
6  
7  
8  
9  
10  
11  
12  
13  
14  
15  
16  
17  
18  
19  
20  
21  
22  
23  
24  
25  
26  
27  
28  
29  
30  
31  
32  
33  
34  
35  
36  
37  
38  
39  
40  
41  
42  
43  
44  
45  
46  
47  
48  
49  
50  
51  
52  
53  
54  
55  
56  
57  
58  
59  
60

---

|         |    |                                                                                                                                                                     |    |
|---------|----|---------------------------------------------------------------------------------------------------------------------------------------------------------------------|----|
| Funding | 22 | Give the source of funding and the role of the funders<br>for the present study and, if applicable, for the original<br>study on which the present article is based | 17 |
|---------|----|---------------------------------------------------------------------------------------------------------------------------------------------------------------------|----|

---

For peer review only

# BMJ Open

## Characterization of the rural indigent population in Burkina Faso: a screening tool for setting priority health care services in sub-Saharan Africa

|                                 |                                                                                                                                                                                                                                                                                                                                                                                                                                                                                                                                                                                                                                                                                                                                                                                                                                                                                                                                                                    |
|---------------------------------|--------------------------------------------------------------------------------------------------------------------------------------------------------------------------------------------------------------------------------------------------------------------------------------------------------------------------------------------------------------------------------------------------------------------------------------------------------------------------------------------------------------------------------------------------------------------------------------------------------------------------------------------------------------------------------------------------------------------------------------------------------------------------------------------------------------------------------------------------------------------------------------------------------------------------------------------------------------------|
| Journal:                        | <i>BMJ Open</i>                                                                                                                                                                                                                                                                                                                                                                                                                                                                                                                                                                                                                                                                                                                                                                                                                                                                                                                                                    |
| Manuscript ID                   | bmjopen-2016-013405.R2                                                                                                                                                                                                                                                                                                                                                                                                                                                                                                                                                                                                                                                                                                                                                                                                                                                                                                                                             |
| Article Type:                   | Research                                                                                                                                                                                                                                                                                                                                                                                                                                                                                                                                                                                                                                                                                                                                                                                                                                                                                                                                                           |
| Date Submitted by the Author:   | 18-Apr-2017                                                                                                                                                                                                                                                                                                                                                                                                                                                                                                                                                                                                                                                                                                                                                                                                                                                                                                                                                        |
| Complete List of Authors:       | Ouédraogo, Samiratou; University of Montreal Public Health Research Institute, Department of Social and Preventive Medicine; University of Montreal School of Public Health<br>Ridde, Valéry; University of Montreal Public Health Research Institute, Department of Social and Preventive Medicine; University of Montreal School of Public Health<br>Atchessi, Nicole; University of Montreal Public Health Research Institute, Department of Social and Preventive Medicine; University of Montreal School of Public Health<br>Souares, Aurélia; University of Heidelberg, Institute of Public Health<br>Koulidiati, Jean-Louis; University of Heidelberg, Institute of Public Health<br>Stoeffler, Quentin; University of California, Agricultural and Resource Economics<br>Zunzunegui, Maria-Victoria; University of Montreal Public Health Research Institute, Department of Social and Preventive Medicine; University of Montreal School of Public Health |
| <b>Primary Subject Heading</b>: | Global health                                                                                                                                                                                                                                                                                                                                                                                                                                                                                                                                                                                                                                                                                                                                                                                                                                                                                                                                                      |
| Secondary Subject Heading:      | Health services research, Public health, Research methods, Epidemiology, Health policy                                                                                                                                                                                                                                                                                                                                                                                                                                                                                                                                                                                                                                                                                                                                                                                                                                                                             |
| Keywords:                       | Indigent, social vulnerability, universal health coverage, Burkina Faso, community-based targeting, priority health care services                                                                                                                                                                                                                                                                                                                                                                                                                                                                                                                                                                                                                                                                                                                                                                                                                                  |
|                                 |                                                                                                                                                                                                                                                                                                                                                                                                                                                                                                                                                                                                                                                                                                                                                                                                                                                                                                                                                                    |

SCHOLARONE™  
Manuscripts

**RESEARCH ARTICLE**

**Title: Characterization of the rural indigent population in Burkina Faso: a screening tool for setting priority health care services in sub-Saharan Africa.**

**Authors:**

Samiratou Ouédraogo<sup>1\*</sup>; Valéry Ridde<sup>1</sup>; Nicole Atchessi<sup>1</sup>; Aurélia Souares<sup>2</sup>; Jean-Louis Koulidiati<sup>2</sup>; Quentin Stoeffler<sup>3</sup>; Maria-Victoria Zunzunegui<sup>1</sup>

**\*Correspondence** to Samiratou Ouédraogo

E-mail: [samioued@yahoo.fr](mailto:samioued@yahoo.fr)

Address: University of Montreal Public Health Research Institute, 7101, Avenue du Parc, 3rd Floor, Montreal, QC H3N 1X9, Canada

**Affiliations:**

<sup>1</sup> University of Montreal Public Health Research Institute, Department of Social and Preventive Medicine, University of Montreal School of Public Health, Montreal, Canada

<sup>2</sup>Institute of Public Health, University of Heidelberg, Heidelberg, Germany

<sup>3</sup>Agricultural and Resource Economics, University of California, Davis, USA

**Keywords:** Indigent; social vulnerability; community-based targeting; universal health coverage; priority health care services, Burkina Faso.

**Word count for article text: 3330**

**Word count for abstract: 293**

**Number of tables: 2**

**Number of figures: 2**



## ABSTRACT

### *Background*

In Africa, health research on indigent people has focused on how to target them for services, but little research has been conducted to identify the social groups that compose indigence. Our aim was to identify what makes someone indigent beyond being recognized by the community as needing a card for free health care.

### *Methods*

We used data from a survey conducted to evaluate a State-led intervention for performance-based financing of health services in two districts of Burkina Faso. In 2015, we analysed data of 1,783 non-indigents and 829 people defined as indigents by their community in 21 villages following community-based targeting processes. Using a classification tree, we built a model to select socioeconomic and health characteristics that were likely to distinguish between non-indigents and indigents. We described the screening performance of the tree using data from specific nodes.

### *Results*

Widow(er)s under 45 years of age, unmarried people aged 45 years and over, and married women aged 60 years and over were more likely to be identified as indigents by their community. Simple rules based on age, marital status, and gender detected indigents with sensitivity of 75.6% and specificity of 55% among those 45 years and over; among those under 45, sensitivity was 85.5% and specificity 92.2%. For both tests combined, sensitivity was 78% and specificity 81%.

### *Conclusion*

In moving toward universal health coverage, Burkina Faso should extend free access to priority health care services to widow(er)s under 45, unmarried people aged 45 years and over, and married women aged 60 years and over, and services should be adapted to their health needs.

### *Ethics considerations*

1  
2  
3  
4  
5  
6  
7  
8  
9  
10  
11  
12  
13  
14  
15  
16  
17  
18  
19  
20  
21  
22  
23  
24  
25  
26  
27  
28  
29  
30  
31  
32  
33  
34  
35  
36  
37  
38  
39  
40  
41  
42  
43  
44  
45  
46  
47  
48  
49  
50  
51  
52  
53  
54  
55  
56  
57  
58  
59  
60

The collection, storage, and release of data for research purposes were authorized by a government ethics committee in Burkina Faso (Decision No. 2013-7-066). Respondent consent was obtained verbally.

For peer review only

## STRENGTHS AND LIMITATIONS OF THIS STUDY

- To our knowledge, this is the first published study that identified those who constitute an indigent population in a sub-Saharan African country;
- The results of the study provided local authorities in Burkina Faso with useful information on populations that need urgent health care coverage;
- This study was limited to certain rural areas in Burkina Faso; further research is needed to assess whether these results can be generalized;
- Due to lack of data, we could not perform comparative analyses of the characteristics of people with and without missing data in the study.

## INTRODUCTION

Universal health coverage (UHC) has been a key objective for the international community since the call made by the United Nations in 2012. However, given resource constraints, countries must determine their own priorities, and UHC does not mean governments will be able to provide access to all possible health services. High-priority health services should, however, be available to everyone.<sup>(1)</sup> UHC implementation could follow the path of progressive universalism, which involves initially targeting indigents to support them proportionally to their level of disadvantage and offer them high-priority services.<sup>(2)</sup> Targeting social benefits in developing countries has proven challenging.<sup>(3, 4)</sup> More specifically, identifying indigents is a challenge for health care sector reform, particularly in Africa,<sup>(5, 6)</sup> where two processes have been regularly investigated: community-based targeting (CBT) and proxy mean testing (PMT).<sup>(7, 8)</sup> Unlike PMT, there are few studies on CBT in sub-Saharan Africa. In Burkina Faso, CBT consists of a process by which the worst-off are selected by a gender-balanced village selection committee of community members appointed by the village health committee. To avoid any capture of local elite,<sup>(9-11)</sup> the selection committees members cannot be administrative officers, village chiefs, or health committee members. Village selection committees produce lists of indigents whom they select based on a consensual definition and with no pre-determined criteria: "Someone who is extremely disadvantaged socially and economically, unable to look after him/herself, and devoid of internal or external resources". The process and the definition were introduced and validated by Ridde et al. in 2007.<sup>(12-14)</sup> However, they also showed that user fees exemptions are not enough and that more is needed to ensure indigents benefit from services. <sup>(15)</sup> Moreover, no study has identified who are those in a state of indigence. Are elderly adults protected informally by their extended families, or do they lack adequate resources to spend on health care in the absence of formal government safety nets and old age pensions? What access do poor women have to health care in societies where men have the decisional power in the family? In a patriarchal society, is being a woman a driver toward indigence?

In this study, our aim was to identify what makes someone an indigent beyond being recognized by his or her community as needing a card for free health care.

## POPULATION AND METHODS

### Setting

A State-led intervention combining performance-based financing for health care with user fees exemptions for indigents was implemented in 10 districts in Burkina Faso in 2014. It provided increased financing to health care structures and staff based on quantity and quality of care provided. Higher fee-for-service rates were offered for some services delivered to indigents.<sup>(16)</sup> To identify indigents in each district, a CBT process was implemented in villages concerned by the intervention. In each village, the selection committee was given the entire responsibility and autonomy to select the worst-off within their community. These committees each developed a list of indigents based on their perception of the definition suggested by Ridde et al.<sup>(12)</sup> These lists were validated by an external committee. The World Bank financed this State-led program, paying up to 7.2 times more for some consultations for indigents than for those of non-indigents.

The study was conducted in 21 villages in two rural districts of Burkina Faso with an agricultural economy: Diébougou (127,857 inhabitants) in the southwest and Gourcy (208,740 inhabitants) in the north. With only four general practitioners and no specialists in both districts, health services use in these areas is very low. In 2014, the average annual number of health visits per inhabitant was 1.03 in Diébougou and 0.73 in Gourcy.<sup>(17)</sup> These districts are different in terms of agricultural practices, weather conditions, and ethnic composition. They therefore represent a diversity of rural contexts in Burkina Faso. Table 1 presents the villages' total populations in 2011 as well as the numbers of non-indigents and indigents included in the present study.

### Study sample

Data were collected between February and April 2015, dry season months when households are more available for interviews than during the agricultural season.

About ten villages were randomly selected in each district (table 1); all households that included an indigent identified by the CBT were included. For comparison, we randomly selected 85% of households without indigence in Diébougou and 45% in Gourcy.

1  
2  
3 Altogether, 2,077 non-indigents and 1,009 indigents were identified for the study in the  
4 two districts.  
5

6  
7 Data were collected on tablets by trained investigators using Open Data Kit (ODK)  
8 software. The household questionnaire included modules on household composition,  
9 education, assets, and other dimensions. In households including at least one indigent,  
10 an individual health questionnaire survey was administered to the indigent member(s).  
11 In households without an indigent, an individual member was randomly selected and  
12 administered the same individual health questionnaire.  
13  
14  
15  
16  
17  
18  
19

### 20 **Study variables**

21  
22 Individual-level variables were selected based on health determinants reported in  
23 previous studies in Africa:<sup>(18-21)</sup>  
24

25  
26  
27 - Demographic characteristics: gender (male, female), age (18–24, 25–34, 35–44, 45–59,  
28 60+), marital status (single, monogamous union or living together, polygamous union,  
29 divorced or separated, widowed);  
30  
31

32  
33 - Socio-economic characteristics: highest level of education (none, primary school,  
34 secondary school); engaging in income-producing activity in the past seven days;  
35 difficulties satisfying food needs; financial constraints making it difficult to buy food, use  
36 the health care centre, or buy medicines;  
37  
38  
39

40  
41 - Health: self-rated health (poor, not poor); self-reported chronic disease; visual  
42 impairment;  
43  
44

45  
46 - Physical functioning: physical disability; limitations in walking 400 metres; upper limb  
47 strength limitations.  
48

### 49 **Ethics**

50  
51  
52 An ethics committee of the Government of Burkina Faso approved the study (Decision  
53 No. 2013-7-066). Respondent consent was obtained verbally.  
54  
55  
56  
57

## Data sharing

No additional data were available.

## Statistical methods

Chi-squared tests were used to compare socio-economic characteristics, health status, and physical functioning of non-indigents and indigents.

To create classification models (IBM SPSS Statistics Version 22), we used the IBM SPSS Decision Trees procedure. Classification and regression tree analysis is a non-parametric exploratory method that partitions the sample using explanatory variables so that segments obtained are as homogenous as possible with regard to the dependent variable.<sup>(22)</sup> Using the Quick Unbiased Efficient Statistical Tree method (QUEST), we built a model that allowed us to select socio-economic, health status, and physical functioning characteristics that were most likely to split non-indigents from indigents. All variables available for this study were specified in the decision tree model. Fourteen were included in the final model procedure: gender, age, highest level of education, marital status, engaging in income-producing activity, financial difficulties (financial constraints making it difficult to buy food or use the health care centre), perceived poor health, chronic disease, visual impairment, disability, ability to walk, and physical strength. Variables that did not contribute significantly were automatically removed from the final model.

The target category was “indigent”. For each split, the association between each covariable and the target category was computed using Pearson’s chi-square. At each step, the covariable showing the highest association with the target category was selected for splitting.<sup>(22)</sup> When specifying the model, we set an equal cost of misclassification for non-indigents and indigents, the value of alpha for splitting nodes at 0.05, minimum parent node size at 50, and parent node size at 25. We also performed a sensitivity analysis setting a higher cost of misclassification for indigents (twice that for non-indigents). We randomly split the sample into two subsamples (both including non-indigents and indigents), and the models were fitted using the first as a training sample

1  
2  
3 and then testing on the second subsample. Trees were generated to maximum size,  
4 where each node contained single-class data or no test offered improvement on the mix  
5 of classes at that node, then pruned to avoid over-fitting. We also assessed the screening  
6 performance of the test tree using CBT as a base-case standard for classification of  
7 indigents and non-indigents, since this was the approach adopted by the authorities in  
8 Burkina Faso to identify indigents for access to services.  
9  
10  
11  
12  
13  
14  
15  
16  
17  
18  
19  
20  
21  
22  
23  
24  
25  
26  
27  
28  
29  
30  
31  
32  
33  
34  
35  
36  
37  
38  
39  
40  
41  
42  
43  
44  
45  
46  
47  
48  
49  
50  
51  
52  
53  
54  
55  
56  
57  
58  
59  
60

For peer review only



## RESULTS

We identified 2,077 non-indigents and 1,009 indigents for the study in the two districts. A total of 1,783 (85.8%) non-indigents and 829 (82.2%) indigents aged 18 years and over with complete questionnaires were considered in the present analysis. A total of 294 non-indigents' questionnaires were incomplete and could not be used for the analyses. Indeed, during the period of the interview, 59 indigents were absent from their house, 13 were sick, 22 were too old to respond to the questionnaire, 49 were disabled, 30 did not complete their interview, and 8 indigents had died. Unfortunately, we did not have details on the missing questionnaires for the non-indigents.

### Characteristics of the study population

Of the total sample population, 1,433 (54.9%) lived in Gourcy, 1,555 (59.5%) were women, and 574 (22.0%) were aged 60 years and over. Most were illiterate (2,312, 88.5%); more than one-third (1,004, 38.4%) had difficulties satisfying food needs; 9.4% (246) had difficulties walking 400 metres, and 15.5% (406) perceived their health as poor.

Table 2 presents the study sample characteristics by indigent status. Indigents were more likely to be women, older, illiterate and/or widowed. They were also more likely to be in poor health and to find it financially difficult to cover basic needs.

### Classification of non-indigents and indigents

Figure 1 presents the test tree diagram. Age, marital status, gender, upper limb strength limitations, and financial constraints preventing healthcare centre use and purchase of foodstuffs were the best covariates for separating non-indigents from indigents. All p-values for splitting the nodes were below 0.0001.

We used colour codes to represent tree nodes according to proportions of indigents: red (nodes 3, 9, and 15, with proportions of indigents above 75%); orange (nodes 1, 5, 8, 11, 18, 19, proportions between 50% and 75%); yellow (proportions between 25% and 50%), and green for groups with proportions under 25%. Red nodes (3, 9, and 15) could be used as screening tests with high specificity. Since the first partitioning variable, aged

1  
2  
3 45 years and over, was so strongly associated with indigence, we developed separate  
4 screening schemes for those aged 45 years and over and those under 45.  
5  
6

### 7 **Screening performance of the classification tree**

8

9  
10 Among those aged 45 and over, two nodes (3 and 15) had high prevalence of indigence.  
11 Node 3, which comprised those 45 years and over who were unmarried, contained 150  
12 of the total 332 indigents (45%) in that age group. The sensitivity of “being unmarried”  
13 to detect indigence among those 45 years and over was 45% (150/332), and specificity  
14 was 83% (218/264). Node 15, married women aged 60 years and over, had a prevalence  
15 of indigence of 81.6% and could be used to screen for indigence among those 45 years  
16 and over who were married, with sensitivity of 34% (62/182) and specificity of 94%  
17 (204/218). By combining nodes 3 and 15, we obtained a test of indigence among those  
18 45 years and over with sensitivity of 64% and specificity of 77%.  
19  
20  
21  
22  
23  
24

25  
26 Among those under 45, there was only one red node: node 9, being widowed. The  
27 sensitivity of “being widowed” for indigence was 66% (55/83), and specificity was  
28 99.2% (610/615). Combining these two screening criteria for those 45 years and over  
29 and those under 45, we obtained sensitivity of 64.3% and specificity of 92.6%.  
30  
31  
32

33 Indigence was largely restricted to being old and unmarried. Indeed, the frequency of  
34 indigence among young people (<45 years) who were married or living with a partner  
35 was only 4.3% (Table 3).  
36  
37  
38

39 Goodness of fit of the classification tree was evaluated by the index value and the gains  
40 and index charts. The index value of the model was above 100%, the gains chart was  
41 different from the diagonal reference line, and the index chart started above 100%. Risk  
42 of misclassification was 14.8%. Overall percentage of correct classification was 85.2%.  
43 The sensitivity analysis presented in Appendix 1 (figure 2) confirmed that age, gender,  
44 and marital status were strongly correlated with indigence.  
45  
46  
47  
48  
49  
50  
51  
52  
53  
54  
55  
56  
57  
58  
59  
60

## DISCUSSION

Using survey data on individuals in 21 villages of two rural districts in Burkina Faso, we used classification and regression tree methodology to identify the best indicators of indigence, as defined by the community. Results showed that being aged 45 years and over, unmarried, and/or a woman were strong indicators of being an indigent, according to the community-based definition. Using simple rules based only on easy-to-obtain indicators of age, marital status, and gender, we were able to detect three-quarters of indigents among those aged 45 years and over and six out of seven indigents among those under 45.

Population aging has emerged as a major demographic trend even in low-income countries like Burkina Faso, posing challenges to social institutions.<sup>(23)</sup> With a population estimated at 17.59 million in 2014 and a poverty headcount ratio of 46.7%, Burkina Faso is one of the poorest countries in the world. Life expectancy has increased in recent years, estimated at 58 years for males and 59 for females in 2013.<sup>(24)</sup> To our knowledge, in middle- and low-income countries like Burkina Faso, despite increases in the older adult population generating a greater burden of chronic conditions,<sup>(25)</sup> social and health policies to adapt to the changing age structure are rare. McEniry and McDermott <sup>(26)</sup> describe low-income countries like Burkina Faso as countries where mortality declined rapidly very late in the 20th century. However, in these countries, the health of older cohorts is shaped by survivorship of poor early-life conditions, resulting in early onset of chronic diseases and high prevalence of frailty. Our study showed that aging leads to both poor health and deprivation in Burkina Faso. Roth,<sup>(27)</sup> studying intergenerational relations in Burkina Faso, reported that strength, energy, and therefore the opportunity to earn one's keep decreased with age. Those who cannot participate in reciprocal exchanges of gifts or services risk social marginalization. Yet with no social security<sup>(19, 28)</sup> and without exchange relations, there is no social recognition.

Our study also revealed that unmarried people were more likely to be indigents. As marriage in Africa marks the transition to adulthood, single persons are not recognized as adults able to assume responsibilities.<sup>(27)</sup> Marriage confers status and dignity,<sup>(29)</sup> providing individuals with a sense of meaning and of obligation to others, while

1  
2  
3 inhibiting risky behaviours and encouraging healthy ones.<sup>(30)</sup> Previous studies have  
4 reported that single, divorced, or bereaved persons showed higher mortality and  
5 morbidity in specific diseases,<sup>(31-33)</sup> as well as lower quality of life<sup>(34)</sup> compared with  
6 those who were married or cohabiting. The differences between married and unmarried  
7 people may reflect not only a causal effect of marriage but also a selection effect:  
8 healthier people may be more likely than others to find mates and marry.<sup>(35)</sup>  
9

10  
11  
12  
13  
14 Widows across the globe share two common experiences: loss of social status and  
15 reduced economic circumstances.<sup>(36)</sup> In developed countries, widowhood is experienced  
16 primarily by elderly women, while in developing countries it also affects younger  
17 women, many of whom are still rearing children. Widowers, even when elderly, are far  
18 more likely to remarry,<sup>(37)</sup> but this is not the case for widows, who, if they do remarry,  
19 rarely do so of their own free will. As a result, many women spend a long period of their  
20 lives in widowhood, with all its associated disadvantages and stigmas.<sup>(36)</sup> In a recent  
21 study, Lloyd-Sherlock et al. found that the association between widowhood and being in  
22 the poorest household wealth quintile was consistent across most countries (China,  
23 Ghana, India, the Russian Federation, and South Africa).<sup>(37)</sup> In Burkina Faso, the  
24 sociocultural context is still marked by beliefs and practices leading to discrimination  
25 against women, particularly older women, including widow inheritance, forced  
26 marriage, and social exclusion of women for witchcraft allegations. Belief in witchcraft is  
27 more dominant in rural areas, where poverty usually leads to strained human and in-  
28 law relations, and where most illnesses cannot be explained.<sup>(38)</sup> Women victims of such  
29 violence and discrimination are mostly seniors, have had no children or only girls, have  
30 emigrated, or their children have not "succeeded". They are widowed or  
31 postmenopausal, poor, and uneducated.<sup>(39)</sup> In our study, women who were indigents  
32 were likely to carry health consequences of their reproductive history. After surviving  
33 adolescent childbirth and multiparity, they were at high risk of lower physical  
34 performance,<sup>(40)</sup> chronic diseases, incontinence <sup>(41)</sup>, or fistula.<sup>(42)</sup> Supporting this line of  
35 evidence, Doulogou et al.<sup>(33)</sup> reported that widows in Burkina Faso were more  
36 vulnerable to hypertension than were married women of similar age, education, and  
37 health behaviours.  
38  
39  
40  
41  
42  
43  
44  
45  
46  
47  
48  
49  
50  
51  
52  
53  
54  
55  
56  
57  
58  
59  
60

1  
2  
3 The classification tree showed that even married women, if aged 60 years and over,  
4 were more likely to be indigents. Power inequalities in gender relationships, affecting  
5 access to resources and decision-making on sexual and reproductive issues, are frequent  
6 in West African societies.<sup>(43)</sup> Harmful cultural practices, such as widow cleansing, son  
7 preference, and others, remain threats to women's health and well-being.<sup>(44)</sup> Onadja et  
8 al.<sup>(45)</sup> reported that being a woman was positively associated with higher odds of  
9 cognitive impairment and mobility disability in Burkina Faso, and the size of  
10 associations appeared insensitive to adjustment for various life-course socioeconomic  
11 and health conditions. Females make up an increasing proportion of the world's poor.<sup>(46)</sup>  
12 This situation is exacerbated by age and marital status, as shown in this research.

13  
14 In the present study, we considered CBT as a base-case standard for the classification of  
15 indigents and non-indigents. According to Conning and Kenave<sup>(47)</sup>, CBT may lead to  
16 increased conflict and division within the community and places high time costs on  
17 community leaders. Program goals may be subverted to serve elite interests, or local  
18 targeting preferences might differ substantially from national or donor preferences.  
19 However, the social acceptability, validity, and effectiveness of the CBT process have  
20 been documented in Burkina Faso.<sup>(48-50)</sup> Schleicher et al.<sup>(11)</sup>, who compared  
21 decentralized versus statistical targeting of anti-poverty programs, found that in the  
22 sub-Saharan African context community-based targeting is far more cost-effective than  
23 any statistical targeting procedure for welfare program benefits.

24  
25 Potential limitations of this study include the fact that the results may not be  
26 representative of all of Burkina Faso because the study targeted only certain rural areas.  
27 Moreover, self-reported health included in this study may say more about people's  
28 health awareness, health expectations, and overall life satisfaction than about their  
29 actual health, especially in a poor population with little engagement with services.

### 26 27 **Policy implications**

28  
29 The way the State is organized often exacerbates existing social cleavages, intensifying  
30 inequalities between rich and poor. For many vulnerable groups, such as older adults,  
31 unmarried adults, and widowed women, changes over the past decade have eroded  
32 important social safety networks and practices. Targeting the poorest for free access to  
33 health care or financial assistance has emerged as an alternative to UHC in many low-  
34

1  
2  
3 and middle-income countries. Such targeting requires effective selection strategies. Our  
4 results showed that, as identified by the community, the indigent population in some  
5 rural areas in Burkina Faso is comprised of three groups: widow(er)s under 45,  
6 unmarried people aged 45 years and over, and married women aged 60 years and over.  
7  
8 Using the country's 2014 Demographic Health Survey data, we selected and described  
9 these groups and found they represented 1% of the total population under age 45, 23%  
10 of those aged 45 and over, and 45% of people aged 60 and over. Given scarce resources  
11 in Burkina Faso, a budget impact analysis is needed to estimate the financial  
12 consequences of extending access to free health care services to other sub-groups of  
13 populations. The government's ability and willingness to support and sustain these  
14 programs must be assessed. These analyses should also explore the trade-offs between  
15 sensitivity and specificity in the classification of indigents and non-indigents and  
16 investigate the consequences of including these groups.  
17  
18

19  
20 In moving toward UHC, the government of Burkina Faso has implemented, since April 2,  
21 2016, free access to maternal and child health care. However, as reported here, there are  
22 other vulnerable groups with poor health and limited access to health services. Health  
23 care in Burkina Faso should include high-priority services to unmarried people under 45  
24 and those aged 45 years and over (as in Senegal, where elderly people have free access  
25 to health care),<sup>(51)</sup> particularly widow(er)s and older women, and services should be  
26 adapted to their health needs, including chronic diseases. Extending free access to health  
27 care services to these vulnerable populations living in rural areas may be a pertinent  
28 public health intervention.  
29  
30  
31  
32  
33  
34  
35  
36  
37  
38  
39  
40  
41  
42

### 43 **Conclusion**

44 Using an original study method, this research sheds light on indigence by presenting the  
45 characteristics of indigents as perceived by their own communities. Indigence is rare  
46 among the married population under 45 and frequent among unmarried adults and  
47 older adults, particularly widows(er)s and older women. Indigent people reported  
48 poorer health, chronic disease, and limitations in physical functioning. This implies that  
49 patient-centred health care for indigent people must take into account age and gender,  
50 as well as the management of chronic conditions.  
51  
52  
53  
54  
55  
56  
57  
58  
59  
60

## AUTHORS' CONTRIBUTIONS

Samiratou Ouédraogo performed the statistical analysis, interpreted the results, reviewed the literature, and prepared the manuscript.

Valéry Ridde was involved in conception of the study design, data collection, statistical analysis, interpretation of results, literature review, and manuscript preparation.

Nicole Atchessi, Aurélia Souares, Jean-Louis Kouliadiati, and Quentin Stoeffler participated in conception of the study design, data collection, and manuscript preparation.

Maria-Victoria Zunzunegui was involved in conception of the study design, statistical analysis, interpretation of results, literature review, and manuscript preparation.

All authors read and approved the final manuscript.

**FUNDING STATEMENT**

The “African Region Multi-Donor Trust Fund on Poverty and Social Impact Analysis (PSIA)” funded data collection for this study. The World Bank and the Canadian Institutes of Health Research (CIHR), through the project “Community research studies and interventions for health equity in Burkina Faso” (Grant number ROH-115213), funded statistical analysis, interpretation, and manuscript preparation. Valéry Ridde holds a CIHR-funded Research Chair in Applied Public Health (CPP 137901). The University of Montreal Public Health Research Institute supported the costs related to editing of the present manuscript.

The funding bodies did not play any role in the study design, analysis, interpretation of data, writing of the manuscript, or decision to submit it for publication.



## ACKNOWLEDGEMENTS

We thank Anne-Marie Turcotte-Tremblay for assistance in the editing of the manuscript.

We thank Yamba Kafando, Jake Robin, Haidara Ousmane Diadie, and Philippe Compaoré for their assistance during the study.

We thank the research NGO “AGIR” and its staff for conducting the interviews.

We thank “SERSAP” for coordinating the selection of indigents by the communities.

We thank the Demographic and Health Surveys (DHS) Program for providing Burkina Faso’s 2014 DHS data.

1  
2  
3  
4  
5  
6  
7  
8  
9  
10  
11  
12  
13  
14  
15  
16  
17  
18  
19  
20  
21  
22  
23  
24  
25  
26  
27  
28  
29  
30  
31  
32  
33  
34  
35  
36  
37  
38  
39  
40  
41  
42  
43  
44  
45  
46  
47  
48  
49  
50  
51  
52  
53  
54  
55  
56  
57  
58  
59  
60

**COMPETING INTERESTS**

The authors declare that they have no conflicts of interest.

For peer review only

## TABLES

**Table 1: Total population in each village and number of non-indigents and indigents**

| <b>Villages</b>                                  | <b>Total population in 2011</b> | <b>Non-indigents</b> | <b>Indigents</b> |
|--------------------------------------------------|---------------------------------|----------------------|------------------|
| <b>District of Gourcy (North region)</b>         |                                 |                      |                  |
| Bassi                                            | 3140                            | 272                  | 18               |
| Palle                                            | 1602                            | 100                  | 12               |
| Garou                                            | 627                             | 26                   | 38               |
| Doure                                            | 1297                            | 69                   | 36               |
| Kibilo                                           | 2799                            | 180                  | 19               |
| Leleguere                                        | 765                             | 50                   | 27               |
| Minima                                           | 1413                            | 82                   | 24               |
| Zankolga                                         | 546                             | 35                   | 32               |
| Ranoua                                           | 2190                            | 124                  | 27               |
| Bouloulou                                        | 2131                            | 115                  | 32               |
| Rassomde                                         | 1940                            | 99                   | 16               |
| <b>District of Diébougou (South-west region)</b> |                                 |                      |                  |
| Obro                                             | 641                             | 47                   | 38               |
| Sorindigui                                       | 534                             | 55                   | 38               |
| Bonfesso                                         | 633                             | 94                   | 28               |
| Nabere                                           | 864                             | 120                  | 35               |
| Tansie                                           | 1412                            | 88                   | 166              |
| Olbontoune                                       | 312                             | 27                   | 71               |
| Diagnon                                          | 264                             | 9                    | 30               |
| Diourao                                          | 556                             | 32                   | 53               |
| Tiakoura                                         | 216                             | 31                   | 37               |

1  
2  
3  
4  
5  
6  
7  
8  
9  
10  
11  
12  
13  
14  
15  
16  
17  
18  
19  
20  
21  
22  
23  
24  
25  
26  
27  
28  
29  
30  
31  
32  
33  
34  
35  
36  
37  
38  
39  
40  
41  
42  
43  
44  
45  
46  
47  
48  
49  
50  
51  
52  
53  
54  
55  
56  
57  
58  
59  
60

|      |     |     |    |
|------|-----|-----|----|
| Poyo | 950 | 128 | 27 |
|------|-----|-----|----|

---

For peer review only

**Table 2: Comparison of socio-economic characteristics and health status between non-indigents and indigents**

| Variables                                  | Total Number | Non-indigents |            | Indigents  |            | P value |
|--------------------------------------------|--------------|---------------|------------|------------|------------|---------|
|                                            |              | Number        | Percentage | Number     | Percentage |         |
|                                            |              | <b>1783</b>   |            | <b>829</b> |            |         |
| <b>District</b>                            |              |               |            |            |            | <0.0001 |
| Diébougou                                  | 1179         | 631           | 35.4       | 548        | 66.1       |         |
| Gourcy                                     | 1433         | 1152          | 64.6       | 281        | 33.9       |         |
| <b>Gender</b>                              |              |               |            |            |            | <0.0001 |
| Male                                       | 1057         | 802           | 45.0       | 255        | 30.8       |         |
| Female                                     | 1555         | 981           | 55.0       | 574        | 69.2       |         |
| <b>Age (years)</b>                         |              |               |            |            |            | <0.0001 |
| 18–24                                      | 368          | 364           | 20.4       | 4          | 0.5        |         |
| 25–34                                      | 555          | 524           | 29.4       | 31         | 3.7        |         |
| 35–44                                      | 457          | 328           | 18.4       | 129        | 15.6       |         |
| 45–59                                      | 658          | 333           | 18.4       | 325        | 39.2       |         |
| 60+                                        | 574          | 234           | 13.1       | 340        | 41.0       |         |
| <b>Highest level of education achieved</b> |              |               |            |            |            | <0.0001 |
| None                                       | 2312         | 1522          | 85.4       | 790        | 95.3       |         |
| Primary school                             | 213          | 188           | 10.5       | 25         | 3.0        |         |
| Secondary school                           | 87           | 73            | 4.1        | 14         | 1.7        |         |
| <b>Marital status</b>                      |              |               |            |            |            | <0.0001 |
| Single                                     | 111          | 68            | 3.8        | 43         | 5.2        |         |
| Monogamous union or living together        | 1308         | 1035          | 58.0       | 273        | 32.9       |         |
| Polygamous union                           | 715          | 562           | 31.5       | 153        | 18.5       |         |
| Divorced or separated                      | 25           | 8             | 0.4        | 17         | 2.1        |         |
| Widowed                                    | 453          | 110           | 6.2        | 343        | 41.4       |         |

|    |                                                                            |      |      |      |     |      |         |
|----|----------------------------------------------------------------------------|------|------|------|-----|------|---------|
| 1  |                                                                            |      |      |      |     |      |         |
| 2  |                                                                            |      |      |      |     |      |         |
| 3  |                                                                            |      |      |      |     |      |         |
| 4  | <b>Engaged in income-producing activity in the past 7 days</b>             |      |      |      |     |      | <0.0001 |
| 5  | No                                                                         | 2044 | 1344 | 75.4 | 700 | 84.4 |         |
| 6  | Yes                                                                        | 568  | 439  | 24.6 | 129 | 15.6 |         |
| 7  |                                                                            |      |      |      |     |      |         |
| 8  |                                                                            |      |      |      |     |      |         |
| 9  | <b>Difficulties satisfying food needs</b>                                  |      |      |      |     |      | <0.0001 |
| 10 | No                                                                         | 1608 | 1219 | 68.4 | 389 | 46.9 |         |
| 11 | Yes                                                                        | 1004 | 564  | 31.6 | 440 | 53.1 |         |
| 12 |                                                                            |      |      |      |     |      |         |
| 13 |                                                                            |      |      |      |     |      |         |
| 14 |                                                                            |      |      |      |     |      |         |
| 15 | <b>Financial difficulties that prevent buying foodstuffs</b>               |      |      |      |     |      | <0.0001 |
| 16 | No                                                                         | 1561 | 1210 | 67.9 | 351 | 42.3 |         |
| 17 | Yes                                                                        | 1051 | 573  | 32.1 | 478 | 57.7 |         |
| 18 |                                                                            |      |      |      |     |      |         |
| 19 |                                                                            |      |      |      |     |      |         |
| 20 | <b>Financial difficulties that prevent going to the health care centre</b> |      |      |      |     |      | <0.0001 |
| 21 | No                                                                         | 1553 | 1250 | 70.1 | 303 | 36.6 |         |
| 22 | Yes                                                                        | 1059 | 533  | 29.9 | 526 | 63.4 |         |
| 23 |                                                                            |      |      |      |     |      |         |
| 24 |                                                                            |      |      |      |     |      |         |
| 25 |                                                                            |      |      |      |     |      |         |
| 26 | <b>Financial difficulties that prevent buying medicines</b>                |      |      |      |     |      | <0.0001 |
| 27 | No                                                                         | 1610 | 1280 | 71.8 | 330 | 39.8 |         |
| 28 | Yes                                                                        | 1002 | 503  | 28.2 | 499 | 60.2 |         |
| 29 |                                                                            |      |      |      |     |      |         |
| 30 |                                                                            |      |      |      |     |      |         |
| 31 | <b>Perceived poor health</b>                                               |      |      |      |     |      | <0.0001 |
| 32 | No                                                                         | 2206 | 1629 | 91.4 | 577 | 69.6 |         |
| 33 | Yes                                                                        | 406  | 154  | 8.6  | 252 | 30.4 |         |
| 34 |                                                                            |      |      |      |     |      |         |
| 35 |                                                                            |      |      |      |     |      |         |
| 36 |                                                                            |      |      |      |     |      |         |
| 37 | <b>Chronic disease</b>                                                     |      |      |      |     |      | <0.0001 |
| 38 | No                                                                         | 1592 | 1243 | 69.7 | 349 | 42.1 |         |
| 39 | Yes                                                                        | 1020 | 540  | 30.3 | 480 | 57.9 |         |
| 40 |                                                                            |      |      |      |     |      |         |
| 41 |                                                                            |      |      |      |     |      |         |
| 42 | <b>Disability</b>                                                          |      |      |      |     |      | <0.0001 |
| 43 | No                                                                         | 2297 | 1679 | 94.2 | 618 | 74.5 |         |
| 44 | Yes                                                                        | 315  | 104  | 5.8  | 211 | 25.5 |         |
| 45 |                                                                            |      |      |      |     |      |         |
| 46 |                                                                            |      |      |      |     |      |         |
| 47 |                                                                            |      |      |      |     |      |         |
| 48 | <b>Perceived limitations in ability to walk 400m</b>                       |      |      |      |     |      | <0.0001 |
| 49 | No                                                                         | 2366 | 1702 | 95.5 | 664 | 80.1 |         |
| 50 | Yes                                                                        | 246  | 81   | 4.5  | 165 | 19.9 |         |
| 51 |                                                                            |      |      |      |     |      |         |
| 52 |                                                                            |      |      |      |     |      |         |
| 53 | <b>Perceived limitations in upper limb strength</b>                        |      |      |      |     |      | <0.0001 |
| 54 | No                                                                         | 2282 | 1697 | 95.2 | 585 | 70.6 |         |
| 55 |                                                                            |      |      |      |     |      |         |
| 56 |                                                                            |      |      |      |     |      |         |
| 57 |                                                                            |      |      |      |     |      |         |
| 58 |                                                                            |      |      |      |     |      |         |
| 59 |                                                                            |      |      |      |     |      |         |
| 60 |                                                                            |      |      |      |     |      |         |

|    |                          |      |      |      |     |      |
|----|--------------------------|------|------|------|-----|------|
| 1  |                          |      |      |      |     |      |
| 2  |                          |      |      |      |     |      |
| 3  | Yes                      | 330  | 86   | 4.8  | 244 | 29.4 |
| 4  |                          |      |      |      |     |      |
| 5  | <b>Visual impairment</b> |      |      |      |     | 0.4  |
| 6  |                          |      |      |      |     |      |
| 7  | No                       | 2560 | 1745 | 97.9 | 815 | 98.3 |
| 8  |                          |      |      |      |     |      |
| 9  | Yes                      | 52   | 38   | 2.1  | 14  | 1.7  |
| 10 | <hr/>                    |      |      |      |     |      |

For peer review only

Table 3: Screening performance of the test tree

| Characteristics  | Test tree nodes      |              |                | Positive predictive value | Negative predictive value |
|------------------|----------------------|--------------|----------------|---------------------------|---------------------------|
|                  |                      | Sensitivity  | Specificity    |                           |                           |
| <b>Under 45</b>  | Red node (9)         | 0.66 (55/83) | 0.99 (610/615) | 0.92 (55/60)              | 0.96 (610/638)            |
|                  |                      | 0.64         | 0.77           |                           |                           |
| <b>45 years+</b> | Red nodes (3, 15)    | (212/332)    | (204/264)      | 0.78 (212/272)            | 0.63 (204/324)            |
|                  |                      | 0.64         | 0.93           |                           |                           |
| <b>All ages</b>  | Red nodes (3, 9, 15) | (267/415)    | (814/879)      | 0.80 (267/332)            | 0.85 (814/962)            |

Data are percentages, with numbers of patients in parentheses:

- Sensitivity in under 45 was 66% (red node) = (Total indigents in node 9) / (Total indigents in this age group; node 2) x 100.
- Specificity in all ages was 93% (red nodes) = [(Total non-indigents in node 1) - (Total non-indigents in nodes 3)] + [(Total non-indigents in node 2) - (Total non-indigents in nodes 5)] / Total non-indigents in all ages groups (nodes 1 and 2) x 100.
- Positive predictive value in all ages was 80% (red nodes 3, 9, and 15) = (Total indigents in red nodes 3, 9, and 15) / (Total non-indigent and indigents in red nodes 3, 9, and 15) x 100.
- Negative predictive value in under 45 was 98% (red and orange nodes) = [(Total non-indigents in node 2) - (Total non-indigents in nodes 5 and 11)] / [(Total indigents in node 2 - Total indigents in nodes 5 and 11) + (Total non-indigents in node 2 - Total non-indigents in nodes 5 and 11)] x 100.



**REFERENCE LIST**

1. Chan M. Making fair choices on the path to universal health coverage. *Health Systems & Reform*. 2016;2(1):5–7.
2. Nicholson D, Yates R, Warburton W, Fontana G. Delivering universal health coverage: a guide for policymakers. Report of the WISH Universal Health Coverage Forum 2015. WISH Partners, 2015 [cited 2016 May 20]. Available from: <https://www.imperial.ac.uk/media/imperial-college/institute-of-global-health-innovation/public/Universal-health-coverage.pdf>
3. Ellis F. 'We are all poor here': economic difference, social divisiveness and targeting cash transfers in Sub-Saharan Africa. *J Dev Stud*. 2012;48(2):201–14.
4. Stoeffler Q, Mills B, del Ninno C. Reaching the poor: cash transfer program targeting in Cameroon. *World Dev*. 2016;83:244–63.
5. Ridde V. "The problem of the worst-off is dealt with after all other issues": the equity and health policy implementation gap in Burkina Faso. *Soc Sci Med*. 2008;66(6):1368–78.
6. Atchessi N, Ridde V, Zunzunegui MV. Is the process for selecting indigents to receive free care in Burkina Faso equitable? *BMC Public Health*. 2014;14:1158.
7. Conning J, Kevane M. Community based targeting mechanisms for social safety nets: a critical review. *World Dev*. 2002;30:375–94.
8. Hanson K, Worrall E, Wiseman V. Targeting services towards the poor: a review of targeting mechanisms and their effectiveness. In: Bennett S, Gilson L, Mills A, editors. *Health, economic development and household poverty: from understanding to action*. London: Routledge; 2007. p. 134–54.
9. Schleicher M, Soares A, Pacere A N, Sauerborn R, Klöner S. Decentralized versus statistical targeting of anti-poverty programs: evidence from Burkina Faso. Working paper, Heidelberg 2016, 59 p. [cited 2017 30 March]. Available from: <http://archiv.ub.uni-heidelberg.de/volltextserver/22223/>
10. Ridde V, Haddad S, Nikiema B, Ouedraogo M, Kafando Y, Bicaba A. Low coverage but few inclusion errors in Burkina Faso: a community-based targeting approach to exempt the indigent from user fees. *BMC Public Health*. 2010;10:631.
11. Kadio K, Ridde V, Samb O. M. Wealth, poverty and local perceptions of poverty in Burkina Faso. 2012. [cited 2017 30 March]. Available from: [http://fr.slideshare.net/valery\\_ridde/wealth-poverty-and-local-perceptions-of-poverty-in-burkina-faso](http://fr.slideshare.net/valery_ridde/wealth-poverty-and-local-perceptions-of-poverty-in-burkina-faso)

- 1  
2  
3 12. Ridde V, Yaogo M, Kafando Y, Sanfo O, Coulibaly N, Nitiema PA, et al. A community-  
4 based targeting approach to exempt the worst-off from user fees in Burkina Faso. *J*  
5 *Epidemiol Community Health*. 2010;64(1):10-5.  
6  
7  
8 13. Ridde V, Haddad S, Nikiema B, Ouedraogo M, Kafando Y, Bicaba A. Low coverage but  
9 few inclusion errors in Burkina Faso: a community-based targeting approach to exempt  
10 the indigent from user fees. *BMC Public Health*. 2010;10:631.  
11  
12 14. Simporé L, Ridde V, Queuille L, Hema A. Évaluation de l'efficacité du ciblage  
13 communautaire des indigents bénéficiaires de la gratuité des soins dans les districts  
14 sanitaires de Dori et de Sebba au Burkina Faso. In: Fournier P, Haddad S, Ridde V, eds.  
15 *Santé maternelle et accès aux soins en Afrique de l'Ouest. Contributions de jeunes*  
16 *chercheurs*. Paris: Harmattan, 2013. p. 209–30.  
17  
18  
19 15. Atchessi N, Ridde V, Zunzunegui MV. User fees exemptions alone are not enough to  
20 increase indigent use of healthcare services. *Health Policy Plan*. 2016;31(5):674–81.  
21  
22  
23 16. Ridde V, Turcotte-Tremblay AM, Souares A, Lohmann J, Zombre D, Koulidiati JL, et al.  
24 Protocol for the process evaluation of interventions combining performance-based  
25 financing with health equity in Burkina Faso. *Implement Sci*. 2014;9:149.  
26  
27  
28 17. Ministère de la santé du Burkina Faso. *Annuaire statistique 2014*. Ouagadougou:  
29 Direction générale des études et des statistiques sectorielles; 2015.  
30  
31 18. Onadja Y, Bignami S, Rossier C, Zunzunegui MV. The components of self-rated health  
32 among adults in Ouagadougou, Burkina Faso. *Popul Health Metr*. 2013;11:15.  
33  
34 19. Badini-Kinda F. The gap between ideas and practices: elderly social insecurity in  
35 rural Burkina Faso / L'écart entre idées et pratiques : l'insécurité sociale des personnes  
36 âgées en milieu rural burkinabé. In: de Jong W, Roth C, Badini-Kinda F, Bhagyanath S,  
37 editors. *Ageing in insecurity: case studies on social security and gender in India and*  
38 *Burkina Faso / Vieillir dans l'insécurité: sécurité sociale et genre en Inde et au Burkina*  
39 *Faso: études de cas*. Piscataway, NJ: Transaction Publishers; 2005. p. 139–66, 323–51.  
40  
41  
42  
43 20. Walker JA. Early marriage in Africa-trends, harmful effects and interventions. *Afr J*  
44 *Reprod Health*. 2012;16(2):231-40.  
45  
46  
47 21. Valmy L, Gontier B, Parriault MC, Van Melle A, Pavlovsky T, Basurko C, et al.  
48 Prevalence and predictive factors for renouncing medical care in poor populations of  
49 Cayenne, French Guiana. *BMC Health Serv Res*. 2016;16:34.  
50  
51  
52 22. Rokach L, Maimon O. Top-down induction of decision trees classifiers – a survey.  
53 *IEEE Trans Syst Man Cybern*. 2002;1(11):12.  
54  
55  
56 23. Kinsella K, He W. *An aging world: 2008. International population reports*.  
57 Washington, DC: U.S. Government Printing Office; 2009. Contract No.: P95/09-1.  
58  
59  
60

1  
2  
3 24. The World Bank. Burkina Faso. 2016 [cited 2016 03 March]; Available from:  
4 <http://data.worldbank.org/country/burkina-faso>.

5  
6 25. Oizumi K, Kajiwara H, Aratame N. Facing up to the problem of population aging in  
7 developing countries: new perspectives for assistance and cooperation. Tokyo: Institute  
8 for International Cooperation, Japan International Cooperation Agency (JICA); 2006.

9  
10 26. McEniry M, McDermott J. Early-life conditions, rapid demographic changes, and older  
11 adult health in the developing world. *Biodemography Soc Biol*. 2015;61(2):147-66.

12  
13 27. Roth C. Les relations intergénérationnelles sous pression au Burkina Faso. *Autrepart:*  
14 *Vieillir au Sud*. 2010;95-110. doi: 10.3917/autr.053.0095

15  
16 28. Roth C. Threatening dependency: limits of social security. Old age and gender in  
17 urban Burkina Faso / Dépendance menaçante : limites de la sécurité sociale, vieil âge et  
18 genre en milieu urbain burkinabé. In: de Jong W, Roth C, Badini-Kinda F, Bhagyanath S,  
19 editors. *Ageing in insecurity: case studies on social security and gender in India and*  
20 *Burkina Faso / Vieillir dans l'insécurité: sécurité sociale et genre en Inde et au Burkina*  
21 *Faso: études de cas*. Piscataway, NJ: Transaction Publishers; 2005. p. 107-37, 289-322.

22  
23 29. Kyalo P. A reflection on the African traditional values of marriage and sexuality.  
24 *IJARPED*. 2012;1(2):211-219.

25  
26 30 Waite L, Gallagher M. The case for marriage: why married people are happier,  
27 healthier and better off financially. New York: Broadway Books; 2000.

28  
29 31. Joung IM, van de Mheen H, Stronks K, van Poppel FW, Mackenbach JP. Differences in  
30 self-reported morbidity by marital status and by living arrangement. *Int J Epidemiol*.  
31 1994;23(1):91-7.

32  
33 32. Hu YR, Goldman N. Mortality differentials by marital status: an international  
34 comparison. *Demography*. 1990;27(2):233-50.

35  
36 33. Doulogou B, Kouanda S, Rossier C, Soura A, Zunzunegui MV. Differences in  
37 hypertension between informal and formal areas of Ouagadougou, a sub-Saharan  
38 African city. *BMC Public Health*. 2014;14:893.

39  
40 34. Han KT, Park EC, Kim JH, Kim SJ, Park S. Is marital status associated with quality of  
41 life? *Health Qual Life Outcomes*. 2014;12:109.

42  
43 35. Bramlett MD, Mosher WD. Cohabitation, marriage, divorce, and remarriage in the  
44 United States. *Vital Health Stat* 23. 2002(22):1-93.

45  
46 36. United Nations. *Widowhood: invisible women, secluded or excluded*. New York:  
47 United Nations Division for the Advancement of Women; 2001 [cited 2016 May 20].  
48 Available from:  
49 [http://www.un.org/womenwatch/daw/public/wom\\_Dec%2001%20single%20pg.pdf](http://www.un.org/womenwatch/daw/public/wom_Dec%2001%20single%20pg.pdf)

50  
51  
52  
53  
54  
55  
56  
57  
58 28  
59  
60

- 1  
2  
3 37. Lloyd-Sherlock P, Corso B, Minicuci N. Widowhood, socio-economic status, health  
4 and wellbeing in low and middle-income countries. *J Dev Stud*. 2015;51(10):1374–88.  
5  
6 38. Meel BL. Witchcraft in Transkei Region of South African: case report. *Afr Health Sci*.  
7 2009;9(1):61–4.  
8  
9 39. Nebie-Zoma DS [Internet]. L'exclusion sociale pour allégation de sorcellerie, une  
10 violence faites aux femmes. 2014 [cited 2016 May 20]. Available from:  
11 <http://www.genreenaction.net/L-exclusion-sociale-pour-allegation-de.html>.  
12  
13 40. Câmara SMA, Pirkle C, Moreira MA, Vieira MCA, Vafaei A, Maciel ÁCC. Early maternal  
14 age and multiparity are associated to poor physical performance in middle-aged women  
15 from Northeast Brazil: a cross-sectional community based study. *BMC Womens Health*.  
16 2015;15:56.  
17  
18 41. Kepenekci I, Keskinilic B, Akinsu F, Cakir P, Elhan AH, Erkek AB, et al. Prevalence of  
19 pelvic floor disorders in the female population and the impact of age, mode of delivery,  
20 and parity. *Dis Colon Rectum*. 2011;54(1):85–94.  
21  
22 42. Maheu-Giroux M, Filippi V, Maulet N, Samadoulougou S, Castro MC, Meda N, et al.  
23 Risk factors for vaginal fistula symptoms in Sub-Saharan Africa: a pooled analysis of  
24 national household survey data. *BMC Pregnancy Childbirth*. 2016;16(1):82.  
25  
26 43. Sen G, Östlin P, George A. Unequal, unfair, ineffective and inefficient gender inequity  
27 in health: why it exists and how we can change it. Final report to the WHO Commission  
28 on Social Determinants of Health, September 2007. Geneva: World Health Organization,  
29 Women and Gender Equity Knowledge Network; 2007.  
30  
31 44. Durojaye E. 'Woman, but not human': widowhood practices and human rights  
32 violations in Nigeria. *Int J Law Policy Family*. 2013;27(2). 176–96.  
33  
34 45. Onadja Y, Atchessi N, Soura BA, Rossier C, Zunzunegui MV. Gender differences in  
35 cognitive impairment and mobility disability in old age: a cross-sectional study in  
36 Ouagadougou, Burkina Faso. *Arch Gerontol Geriatr*. 2013;57(3):311–8.  
37  
38 46. Moghadam MV. The 'feminization of poverty' and women's human rights. Paris:  
39 UNESCO, Division of Human Rights, Gender Equality and Development Section; 2005.  
40  
41 47. Conning J, Kevane M. Community-based targeting mechanisms for social safety nets.  
42 Social Protection Discussion Paper No. 102. Washington, DC: World Bank; 2001.  
43  
44 48. Savadogo G, Souarès A, Sié A, Parmar D, Bibeau G, Sauerborn R. Using a community-  
45 based definition of poverty for targeting poor households for premium subsidies in the  
46 context of a community health insurance in Burkina Faso. *BMC Public Health*.  
47 2015;15:84.  
48  
49  
50  
51  
52  
53  
54  
55  
56  
57  
58  
59  
60

1  
2  
3 49. Atchessi N, Ridde V, Zunzunegui MV. Is the process for selecting indigents to receive  
4 free care in Burkina Faso equitable? BMC Public Health. 2014;14:1158.  
5

6 50. Souares A, Savadogo G, Dong H, Parmar D, Sié A, Sauerborn R. Using community  
7 wealth ranking to identify the poor for subsidies: a case study of community-based  
8 health insurance in Nouna, Burkina Faso. Health Soc Care Community. 2010;18(4):363-  
9 8.  
10

11 51. Mbacké Leye MM, Diongue M, Faye A, Coumé M, Faye A, Tall AB, et al. Analyse du  
12 fonctionnement du plan de prise en charge gratuite des soins chez les personnes âgées «  
13 Plan Sésame » au Sénégal. Santé Publique. 2013;25:101-6.  
14  
15  
16  
17  
18  
19  
20  
21  
22  
23  
24  
25  
26  
27  
28  
29  
30  
31  
32  
33  
34  
35  
36  
37  
38  
39  
40  
41  
42  
43  
44  
45  
46  
47  
48  
49  
50  
51  
52  
53  
54  
55  
56  
57  
58  
59  
60

Figure 1: Test tree diagram

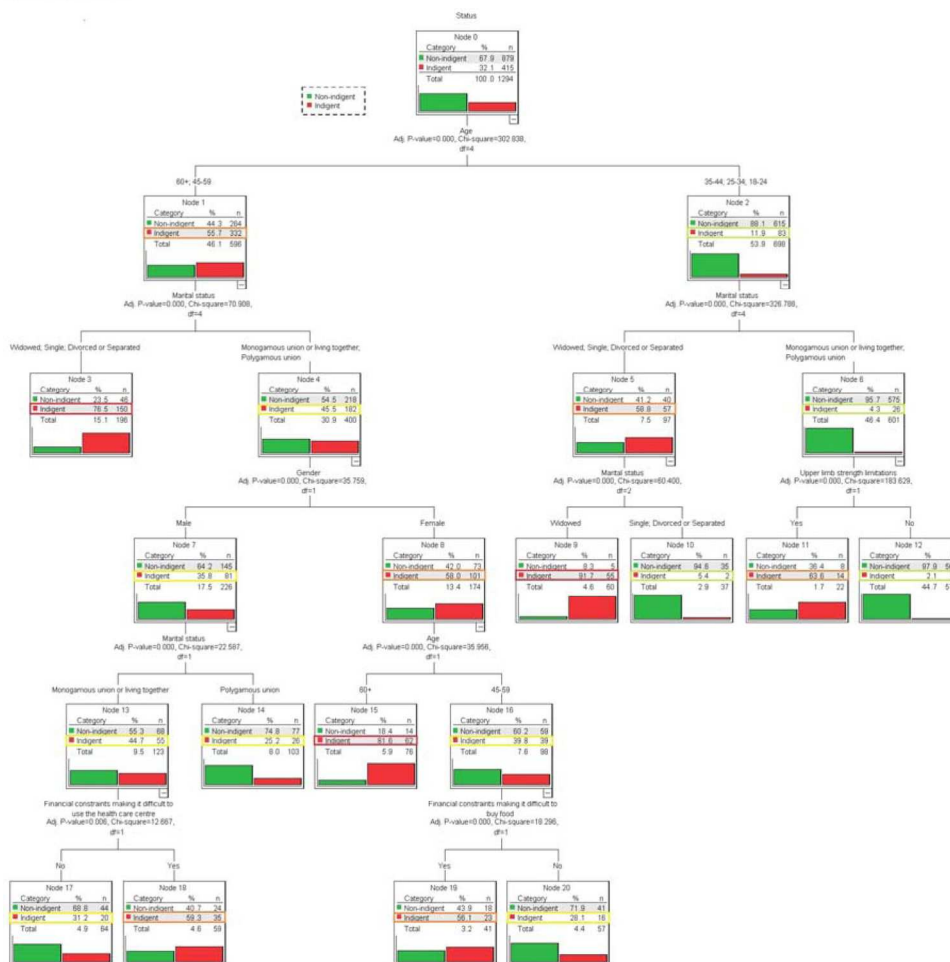

Test tree diagram

159x162mm (300 x 300 DPI)

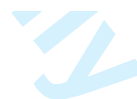

**APPENDIX 1: sensitivity analysis**

Results of the test tree, where the cost of misclassifying indigents as non-indigents was set to be twice the cost of misclassifying non-indigents as indigents. The value of alpha for splitting nodes was set at 0.05, minimum parent node size at 50, and percent node size at 25. The index value and the gains and index charts indicate the classification was good. The index value of the model was greater than 100%, the gain chart was different from the diagonal reference line, and the index chart started above 100%. The risk of misclassification was 20.9%. The overall percentage of correct classification was 83.4%, and 86.5% of indigents were accurately classified by the model.

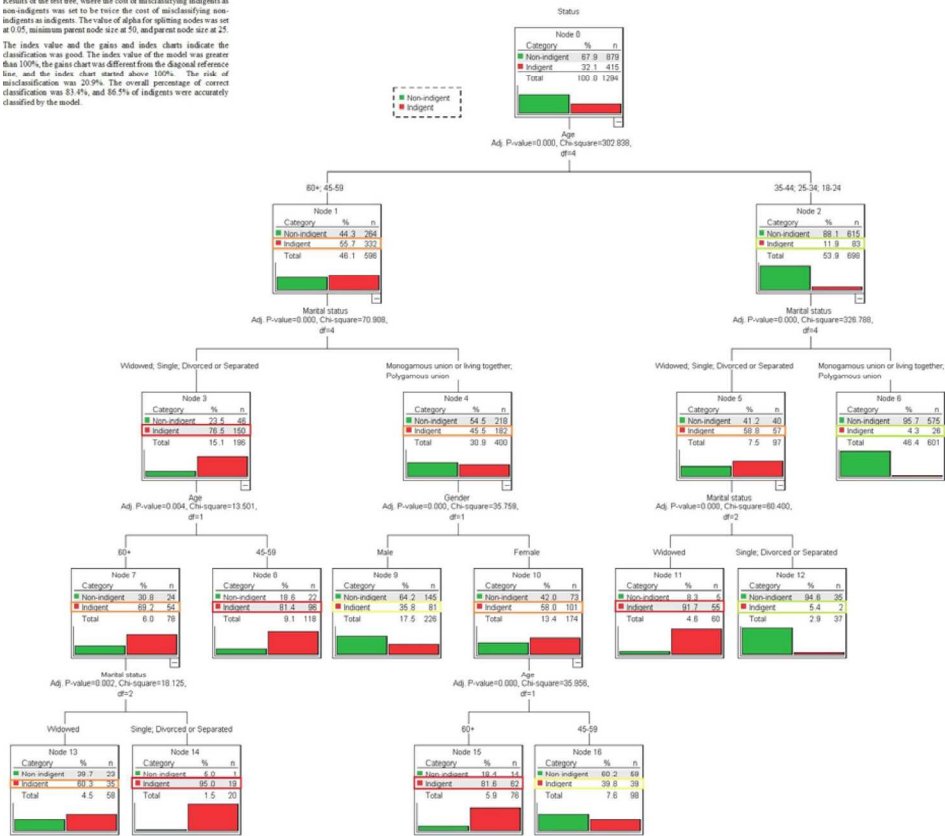

Sensitivity analysis of the tree diagram

159x143mm (300 x 300 DPI)

Only



**STROBE Statement—Checklist of items that should be included in reports of cross-sectional studies**

|                           | <b>Item No</b> | <b>Recommendation</b>                                                                                                                    | <b>Page</b> |
|---------------------------|----------------|------------------------------------------------------------------------------------------------------------------------------------------|-------------|
| <b>Title and abstract</b> | 1              | (a) Indicate the study's design with a commonly used term in the title or the abstract                                                   | 1           |
|                           |                | (b) Provide in the abstract an informative and balanced summary of what was done and what was found                                      | 2-3         |
| <b>Introduction</b>       |                |                                                                                                                                          |             |
| Background/rationale      | 2              | Explain the scientific background and rationale for the investigation being reported                                                     | 5           |
| Objectives                | 3              | State specific objectives, including any prespecified hypotheses                                                                         | 5           |
| <b>Methods</b>            |                |                                                                                                                                          |             |
| Study design              | 4              | Present key elements of study design early in the paper                                                                                  | 6           |
| Setting                   | 5              | Describe the setting, locations, and relevant dates, including periods of recruitment, exposure, follow-up, and data collection          | 6           |
| Participants              | 6              | (a) Give the eligibility criteria, and the sources and methods of selection of participants                                              | 6           |
| Variables                 | 7              | Clearly define all outcomes, exposures, predictors, potential confounders, and effect modifiers. Give diagnostic criteria, if applicable | 7           |



|                              |     |                                                                                                                                                                                                   |               |
|------------------------------|-----|---------------------------------------------------------------------------------------------------------------------------------------------------------------------------------------------------|---------------|
| Data sources/<br>measurement | 8*  | For each variable of interest, give sources of data and details of methods of assessment (measurement). Describe comparability of assessment methods if there is more than one group              | 7             |
| Bias                         | 9   | Describe any efforts to address potential sources of bias                                                                                                                                         |               |
| Study size                   | 10  | Explain how the study size was arrived at                                                                                                                                                         | 10            |
| Quantitative variables       | 11  | Explain how quantitative variables were handled in the analyses. If applicable, describe which groupings were chosen and why                                                                      | 7             |
| Statistical methods          | 12  | (a) Describe all statistical methods, including those used to control for confounding                                                                                                             | 8-9           |
|                              |     | (b) Describe any methods used to examine subgroups and interactions                                                                                                                               | NA            |
|                              |     | (c) Explain how missing data were addressed                                                                                                                                                       |               |
|                              |     | (d) If applicable, describe analytical methods taking account of sampling strategy                                                                                                                | 8-9           |
|                              |     | (e) Describe any sensitivity analyses                                                                                                                                                             | 11 & Appendix |
| <b>Results</b>               |     |                                                                                                                                                                                                   |               |
| Participants                 | 13* | (a) Report numbers of individuals at each stage of study—eg numbers potentially eligible, examined for eligibility, confirmed eligible, included in the study, completing follow-up, and analysed | 10            |
|                              |     | (b) Give reasons for non-participation at each stage                                                                                                                                              |               |
|                              |     | (c) Consider use of a flow diagram                                                                                                                                                                |               |
| Descriptive data             | 14* | (a) Give characteristics of study participants (eg demographic, clinical, social) and information on                                                                                              | 10            |

1  
2  
3 exposures and potential confounders  
4  
5  
6 (b) Indicate number of participants with missing  
7 data for each variable of interest  
8

|                     |     |                                                                                                                                                                                                                                      |       |
|---------------------|-----|--------------------------------------------------------------------------------------------------------------------------------------------------------------------------------------------------------------------------------------|-------|
| 9 Outcome data      | 15* | Report numbers of outcome events or summary<br>10 measures                                                                                                                                                                           | 22    |
| 11 Main results     | 16  | (a) Give unadjusted estimates and, if applicable,<br>12 confounder-adjusted estimates and their precision<br>13 (eg, 95% confidence interval). Make clear which<br>14 confounders were adjusted for and why they were<br>15 included | NA    |
|                     |     | (b) Report category boundaries when continuous<br>16 variables were categorized                                                                                                                                                      | NA    |
|                     |     | (c) If relevant, consider translating estimates of<br>17 relative risk into absolute risk for a meaningful time<br>18 period                                                                                                         | NA    |
| 19 Other analyses   | 17  | Report other analyses done—eg analyses of<br>20 subgroups and interactions, and sensitivity analyses                                                                                                                                 | NA    |
| <b>Discussion</b>   |     |                                                                                                                                                                                                                                      |       |
| 21 Key results      | 18  | Summarise key results with reference to study<br>22 objectives                                                                                                                                                                       | 13    |
| 23 Limitations      | 19  | Discuss limitations of the study, taking into account<br>24 sources of potential bias or imprecision. Discuss<br>25 both direction and magnitude of any potential bias                                                               | 14    |
| 26 Interpretation   | 20  | Give a cautious overall interpretation of results<br>27 considering objectives, limitations, multiplicity of<br>28 analyses, results from similar studies, and other<br>29 relevant evidence                                         | 12-15 |
| 30 Generalisability | 21  | Discuss the generalisability (external validity) of the<br>31 study results                                                                                                                                                          | 14    |

**Other information**

---

|         |    |                                                                                                                                                               |    |
|---------|----|---------------------------------------------------------------------------------------------------------------------------------------------------------------|----|
| Funding | 22 | Give the source of funding and the role of the funders for the present study and, if applicable, for the original study on which the present article is based | 17 |
|---------|----|---------------------------------------------------------------------------------------------------------------------------------------------------------------|----|

---

For peer review only

# BMJ Open

## Characterization of the rural indigent population in Burkina Faso: a screening tool for setting priority health care services in sub-Saharan Africa

|                                 |                                                                                                                                                                                                                                                                                                                                                                                                                                                                                                                                                                                                                                                                                                                                                                                                                                                                                                                                                                    |
|---------------------------------|--------------------------------------------------------------------------------------------------------------------------------------------------------------------------------------------------------------------------------------------------------------------------------------------------------------------------------------------------------------------------------------------------------------------------------------------------------------------------------------------------------------------------------------------------------------------------------------------------------------------------------------------------------------------------------------------------------------------------------------------------------------------------------------------------------------------------------------------------------------------------------------------------------------------------------------------------------------------|
| Journal:                        | <i>BMJ Open</i>                                                                                                                                                                                                                                                                                                                                                                                                                                                                                                                                                                                                                                                                                                                                                                                                                                                                                                                                                    |
| Manuscript ID                   | bmjopen-2016-013405.R3                                                                                                                                                                                                                                                                                                                                                                                                                                                                                                                                                                                                                                                                                                                                                                                                                                                                                                                                             |
| Article Type:                   | Research                                                                                                                                                                                                                                                                                                                                                                                                                                                                                                                                                                                                                                                                                                                                                                                                                                                                                                                                                           |
| Date Submitted by the Author:   | 27-Apr-2017                                                                                                                                                                                                                                                                                                                                                                                                                                                                                                                                                                                                                                                                                                                                                                                                                                                                                                                                                        |
| Complete List of Authors:       | Ouédraogo, Samiratou; University of Montreal Public Health Research Institute, Department of Social and Preventive Medicine; University of Montreal School of Public Health<br>Ridde, Valéry; University of Montreal Public Health Research Institute, Department of Social and Preventive Medicine; University of Montreal School of Public Health<br>Atchessi, Nicole; University of Montreal Public Health Research Institute, Department of Social and Preventive Medicine; University of Montreal School of Public Health<br>Souares, Aurélia; University of Heidelberg, Institute of Public Health<br>Koulidiati, Jean-Louis; University of Heidelberg, Institute of Public Health<br>Stoeffler, Quentin; University of California, Agricultural and Resource Economics<br>Zunzunegui, Maria-Victoria; University of Montreal Public Health Research Institute, Department of Social and Preventive Medicine; University of Montreal School of Public Health |
| <b>Primary Subject Heading</b>: | Global health                                                                                                                                                                                                                                                                                                                                                                                                                                                                                                                                                                                                                                                                                                                                                                                                                                                                                                                                                      |
| Secondary Subject Heading:      | Health services research, Public health, Research methods, Epidemiology, Health policy                                                                                                                                                                                                                                                                                                                                                                                                                                                                                                                                                                                                                                                                                                                                                                                                                                                                             |
| Keywords:                       | Indigent, social vulnerability, universal health coverage, Burkina Faso, community-based targeting, priority health care services                                                                                                                                                                                                                                                                                                                                                                                                                                                                                                                                                                                                                                                                                                                                                                                                                                  |
|                                 |                                                                                                                                                                                                                                                                                                                                                                                                                                                                                                                                                                                                                                                                                                                                                                                                                                                                                                                                                                    |

SCHOLARONE™  
Manuscripts

**RESEARCH ARTICLE**

**Title: Characterization of the rural indigent population in Burkina Faso: a screening tool for setting priority health care services in sub-Saharan Africa.**

**Authors:**

Samiratou Ouédraogo<sup>1\*</sup>; Valéry Ridde<sup>1</sup>; Nicole Atchessi<sup>1</sup>; Aurélia Souares<sup>2</sup>; Jean-Louis Koulidiati<sup>2</sup>; Quentin Stoeffler<sup>3</sup>; Maria-Victoria Zunzunegui<sup>1</sup>

**\*Correspondence** to Samiratou Ouédraogo

E-mail: [samioued@yahoo.fr](mailto:samioued@yahoo.fr)

Address: University of Montreal Public Health Research Institute, 7101, Avenue du Parc, 3rd Floor, Montreal, QC H3N 1X9, Canada

**Affiliations:**

<sup>1</sup> University of Montreal Public Health Research Institute, Department of Social and Preventive Medicine, University of Montreal School of Public Health, Montreal, Canada

<sup>2</sup>Institute of Public Health, University of Heidelberg, Heidelberg, Germany

<sup>3</sup>Agricultural and Resource Economics, University of California, Davis, USA

**Keywords:** Indigent; social vulnerability; community-based targeting; universal health coverage; priority health care services, Burkina Faso.

**Word count for article text: 3410**

**Word count for abstract: 293**

**Number of tables: 2**

**Number of figures: 2**

## ABSTRACT

### *Background*

In Africa, health research on indigent people has focused on how to target them for services, but little research has been conducted to identify the social groups that compose indigence. Our aim was to identify what makes someone indigent beyond being recognized by the community as needing a card for free health care.

### *Methods*

We used data from a survey conducted to evaluate a State-led intervention for performance-based financing of health services in two districts of Burkina Faso. In 2015, we analysed data of 1,783 non-indigents and 829 people defined as indigents by their community in 21 villages following community-based targeting processes. Using a classification tree, we built a model to select socioeconomic and health characteristics that were likely to distinguish between non-indigents and indigents. We described the screening performance of the tree using data from specific nodes.

### *Results*

Widow(er)s under 45 years of age, unmarried people aged 45 years and over, and married women aged 60 years and over were more likely to be identified as indigents by their community. Simple rules based on age, marital status, and gender detected indigents with sensitivity of 75.6% and specificity of 55% among those 45 years and over; among those under 45, sensitivity was 85.5% and specificity 92.2%. For both tests combined, sensitivity was 78% and specificity 81%.

### *Conclusion*

In moving toward universal health coverage, Burkina Faso should extend free access to priority health care services to widow(er)s under 45, unmarried people aged 45 years and over, and married women aged 60 years and over, and services should be adapted to their health needs.

### *Ethics considerations*

1  
2  
3  
4  
5  
6  
7  
8  
9  
10  
11  
12  
13  
14  
15  
16  
17  
18  
19  
20  
21  
22  
23  
24  
25  
26  
27  
28  
29  
30  
31  
32  
33  
34  
35  
36  
37  
38  
39  
40  
41  
42  
43  
44  
45  
46  
47  
48  
49  
50  
51  
52  
53  
54  
55  
56  
57  
58  
59  
60

The collection, storage, and release of data for research purposes were authorized by a government ethics committee in Burkina Faso (Decision No. 2013-7-066). Respondent consent was obtained verbally.

For peer review only

## STRENGTHS AND LIMITATIONS OF THIS STUDY

- To our knowledge, this is the first published study that identified those who constitute an indigent population in a sub-Saharan African country;
- The results of the study provided local authorities in Burkina Faso with useful information on populations that need urgent health care coverage;
- This study was limited to certain rural areas in Burkina Faso; further research is needed to assess whether these results can be generalized;
- Due to lack of data, we could not perform comparative analyses of the characteristics of people with and without missing data in the study.



## INTRODUCTION

Universal health coverage (UHC) has been a key objective for the international community since the call made by the United Nations in 2012. However, given resource constraints, countries must determine their own priorities, and UHC does not mean governments will be able to provide access to all possible health services. High-priority health services should, however, be available to everyone.<sup>(1)</sup> UHC implementation could follow the path of progressive universalism, which involves initially targeting indigents to support them proportionally to their level of disadvantage and offer them high-priority services.<sup>(2)</sup> Targeting social benefits in developing countries has proven challenging.<sup>(3, 4)</sup> More specifically, identifying indigents is a challenge for health care sector reform, particularly in Africa,<sup>(5, 6)</sup> where two processes have been regularly investigated: community-based targeting (CBT) and proxy mean testing (PMT).<sup>(7, 8)</sup> Unlike PMT, there are few studies on CBT in sub-Saharan Africa. In Burkina Faso, CBT consists of a process by which the worst-off are selected by a gender-balanced village selection committee of community members appointed by the village health committee. To avoid any capture of local elite,<sup>(9-11)</sup> the selection committees' members cannot be administrative officers, village chiefs, or health committee members. Village selection committees produce lists of indigents whom they select based on a consensual definition and with no pre-determined criteria: "Someone who is extremely disadvantaged socially and economically, unable to look after him/herself, and devoid of internal or external resources". The process and the definition were introduced and validated by Ridde et al. in 2007.<sup>(12-14)</sup> However, they also showed that user fees exemptions are not enough and that more is needed to ensure indigents benefit from services. <sup>(15)</sup> Moreover, no study has identified who are those in a state of indigence. Are elderly adults protected informally by their extended families, or do they lack adequate resources to spend on health care in the absence of formal government safety nets and old age pensions? What access do poor women have to health care in societies where men have the decisional power in the family? In a patriarchal society, is being a woman a driver toward indigence?

In this study, our aim was to identify what makes someone an indigent beyond being recognized by his or her community as needing a card for free health care.

## POPULATION AND METHODS

### Setting

A State-led intervention combining performance-based financing for health care with user fees exemptions for indigents was implemented in 10 districts in Burkina Faso in 2014. It provided increased financing to health care structures and staff based on quantity and quality of care provided. Higher fee-for-service rates were offered for some services delivered to indigents.<sup>(16)</sup> To identify indigents in each district, a CBT process was implemented in villages concerned by the intervention. In each village, the selection committee was given the entire responsibility and autonomy to select the worst-off within their community. These committees each developed a list of indigents based on their perception of the definition suggested by Ridde et al.<sup>(12)</sup> These lists were validated by an external committee. The World Bank financed this State-led program, paying up to 7.2 times more for some consultations for indigents than for those of non-indigents.

The study was conducted in 21 villages in two rural districts of Burkina Faso with an agricultural economy: Diébougou (127,857 inhabitants) in the southwest and Gourcy (208,740 inhabitants) in the north. With only four general practitioners and no specialists in both districts, health services use in these areas is very low. In 2014, the average annual number of health visits per inhabitant was 1.03 in Diébougou and 0.73 in Gourcy.<sup>(17)</sup> These districts are different in terms of agricultural practices, weather conditions, and ethnic composition. They therefore represent a diversity of rural contexts in Burkina Faso. Table 1 presents the villages' total populations in 2011 as well as the numbers of non-indigents and indigents included in the present study.

### Study sample

Data were collected between February and April 2015, dry season months when households are more available for interviews than during the agricultural season.

About ten villages were randomly selected in each district (table 1); all households that included an indigent identified by the CBT were included. For comparison, we randomly selected 85% of households without indigence in Diébougou and 45% in Gourcy.

1  
2  
3 Altogether, 2,077 non-indigents and 1,009 indigents were identified for the study in the  
4 two districts.  
5

6  
7 Data were collected on tablets by trained investigators using Open Data Kit (ODK)  
8 software. The household questionnaire included modules on household composition,  
9 education, assets and other dimensions. In households including at least one indigent, an  
10 individual health questionnaire survey was administered to the indigent member(s). In  
11 households without an indigent, an individual member was randomly selected and  
12 administered the same individual health questionnaire.  
13  
14  
15  
16  
17

### 20 **Study variables**

21  
22 Individual-level variables were selected based on health determinants reported in  
23 previous studies in Africa:<sup>(18-21)</sup>  
24

25  
26  
27 - Demographic characteristics: gender (male, female), age (18–24, 25–34, 35–44, 45–59,  
28 60+), marital status (single, monogamous union or living together, polygamous union,  
29 divorced or separated, widowed);  
30  
31

32  
33 - Socio-economic characteristics: highest level of education (none, primary school,  
34 secondary school); engaging in income-producing activity in the past seven days;  
35 difficulties satisfying food needs; financial constraints making it difficult to buy food, use  
36 the health care centre, or buy medicines;  
37  
38  
39

40  
41 - Health: self-rated health (poor, not poor); self-reported chronic disease; visual  
42 impairment;  
43  
44

45  
46 - Physical functioning: physical disability; limitations in walking 400 metres; upper limb  
47 strength limitations.  
48

### 51 **Ethics**

52  
53  
54 An ethics committee of the Government of Burkina Faso approved the study (Decision  
55 No. 2013-7-066). Respondent consent was obtained verbally.  
56  
57

## Data sharing

No additional data were available.

## Statistical methods

Chi-squared tests were used to compare socio-economic characteristics, health status, and physical functioning of non-indigents and indigents.

To create classification models (IBM SPSS Statistics Version 22), we used the IBM SPSS Decision Trees procedure. Classification and regression tree analysis is a non-parametric exploratory method that partitions the sample using explanatory variables so that segments obtained are as homogenous as possible with regard to the dependent variable.<sup>(22)</sup> Using the Quick Unbiased Efficient Statistical Tree method (QUEST), we built a model that allowed us to select socio-economic, health status, and physical functioning characteristics that were most likely to split non-indigents from indigents. All variables available for this study were specified in the decision tree model. Fourteen were included in the final model procedure: gender, age, highest level of education, marital status, engaging in income-producing activity, financial difficulties (financial constraints making it difficult to buy food or use the health care centre), perceived poor health, chronic disease, visual impairment, disability, ability to walk and physical strength. Variables that did not contribute significantly were automatically removed from the final model.

The target category was “indigent”. For each split, the association between each covariable and the target category was computed using Pearson’s chi-square. At each step, the covariable showing the highest association with the target category was selected for splitting.<sup>(22)</sup> When specifying the model, we set an equal cost of misclassification for non-indigents and indigents, the value of alpha for splitting nodes at 0.05, minimum parent node size at 50, and parent node size at 25. We also performed a sensitivity analysis setting a higher cost of misclassification for indigents (twice that for non-indigents). We randomly split the sample into two subsamples (both including non-indigents and indigents), and the models were fitted using the first as a training sample

1  
2  
3 and then testing on the second subsample. Trees were generated to maximum size,  
4 where each node contained single-class data or no test offered improvement on the mix  
5 of classes at that node, then pruned to avoid over-fitting. We also assessed the screening  
6 performance of the test tree using CBT as a base-case standard for classification of  
7 indigents and non-indigents, since this was the approach adopted by the authorities in  
8 Burkina Faso to identify indigents for access to services.  
9  
10  
11  
12  
13  
14  
15  
16  
17  
18  
19  
20  
21  
22  
23  
24  
25  
26  
27  
28  
29  
30  
31  
32  
33  
34  
35  
36  
37  
38  
39  
40  
41  
42  
43  
44  
45  
46  
47  
48  
49  
50  
51  
52  
53  
54  
55  
56  
57  
58  
59  
60

For peer review only

## RESULTS

We identified 2,077 non-indigents and 1,009 indigents for the study in the two districts. A total of 1,783 (85.8%) non-indigents and 829 (82.2%) indigents aged 18 years and over with complete questionnaires were considered in the present analysis. Indeed, during the period of the interview, 58 indigents were absent from their house, 13 were sick, 22 were too old to respond to the questionnaire, 49 were disabled, 30 did not complete their interview, and 8 indigents had died. A total of 294 non-indigents' questionnaires were incomplete and could not be used for the analyses. Unfortunately, we did not have details on the missing questionnaires for the non-indigents.

### Characteristics of the study population

Of the total sample population, 1,433 (54.9%) lived in Gourcy, 1,555 (59.5%) were women, and 574 (22.0%) were aged 60 years and over. Most were illiterate (2,312, 88.5%); more than one-third (1,004, 38.4%) had difficulties satisfying food needs; 9.4% (246) had difficulties walking 400 metres, and 15.5% (406) perceived their health as poor.

Table 2 presents the study sample characteristics by indigent status. Indigents were more likely to be women, older, illiterate and/or widowed. They were also more likely to be in poor health and to find it financially difficult to cover basic needs.

### Classification of non-indigents and indigents

Figure 1 presents the test tree diagram. Age, marital status, gender, upper limb strength limitations, and financial constraints preventing healthcare centre use and purchase of foodstuffs were the best covariates for separating non-indigents from indigents. All p-values for splitting the nodes were below 0.0001.

We used colour codes to represent tree nodes according to proportions of indigents: red (nodes 3, 9, and 15, with proportions of indigents above 75%); orange (nodes 1, 5, 8, 11, 18, 19, proportions between 50% and 75%); yellow (proportions between 25% and 50%), and green for groups with proportions under 25%. Red nodes (3, 9, and 15) could be used as screening tests with high specificity. Since the first partitioning variable, aged

1  
2  
3 45 years and over, was so strongly associated with indigence, we developed separate  
4 screening schemes for those aged 45 years and over and those under 45.  
5  
6  
7

### 8 **Screening performance of the classification tree**

9  
10 Among those aged 45 and over, two nodes (3 and 15) had high prevalence of indigence.  
11 Node 3, which comprised those 45 years and over who were unmarried, contained 150  
12 of the total 332 indigents (45%) in that age group. The sensitivity of “being unmarried”  
13 to detect indigence among those 45 years and over was 45% (150/332), and specificity  
14 was 83% (218/264). Node 15, married women aged 60 years and over, had a prevalence  
15 of indigence of 81.6% and could be used to screen for indigence among those 45 years  
16 and over who were married, with sensitivity of 34% (62/182) and specificity of 94%  
17 (204/218). By combining nodes 3 and 15, we obtained a test of indigence among those  
18 45 years and over with sensitivity of 64% and specificity of 77%.  
19  
20  
21  
22  
23  
24  
25

26 Among those under 45, there was only one red node: node 9, being widowed. The  
27 sensitivity of “being widowed” for indigence was 66% (55/83), and specificity was  
28 99.2% (610/615). Combining these two screening criteria for those 45 years and over  
29 and those under 45, we obtained sensitivity of 64.3% and specificity of 92.6%.  
30  
31  
32  
33

34 Indigence was largely restricted to being old and unmarried. Indeed, the frequency of  
35 indigence among young people (<45 years) who were married or living with a partner  
36 was only 4.3% (Table 3).  
37  
38  
39

40 Goodness of fit of the classification tree was evaluated by the index value and the gains  
41 and index charts. The index value of the model was above 100%, the gains chart was  
42 different from the diagonal reference line, and the index chart started above 100%. Risk  
43 of misclassification was 14.8%. Overall percentage of correct classification was 85.2%.  
44 The sensitivity analysis presented in Appendix 1 (figure 2) confirmed that age, gender,  
45 and marital status were strongly correlated with indigence.  
46  
47  
48  
49  
50  
51  
52  
53  
54  
55  
56  
57  
58  
59  
60

## DISCUSSION

Using survey data on individuals in 21 villages of two rural districts in Burkina Faso, we used classification and regression tree methodology to identify the best indicators of indigence, as defined by the community. Results showed that being aged 45 years and over, unmarried, and/or a woman were strong indicators of being an indigent, according to the community-based definition. Using simple rules based only on easy-to-obtain indicators of age, marital status, and gender, we were able to detect three-quarters of indigents among those aged 45 years and over and six out of seven indigents among those under 45.

Population aging has emerged as a major demographic trend even in low-income countries like Burkina Faso, posing challenges to social institutions.<sup>(23)</sup> With a population estimated at 17.59 million in 2014 and a poverty headcount ratio of 46.7%, Burkina Faso is one of the poorest countries in the world. Life expectancy has increased in recent years, estimated at 58 years for males and 59 for females in 2013.<sup>(24)</sup> To our knowledge, in middle- and low-income countries like Burkina Faso, despite increases in the older adult population generating a greater burden of chronic conditions,<sup>(25)</sup> social and health policies to adapt to the changing age structure are rare. McEniry and McDermott <sup>(26)</sup> describe low-income countries like Burkina Faso as countries where mortality declined rapidly very late in the 20th century. However, in these countries, the health of older cohorts is shaped by survivorship of poor early-life conditions, resulting in early onset of chronic diseases and high prevalence of frailty. Our study showed that aging leads to both poor health and deprivation in Burkina Faso. Roth,<sup>(27)</sup> studying intergenerational relations in Burkina Faso, reported that strength, energy, and therefore the opportunity to earn one's keep decreased with age. Those who cannot participate in reciprocal exchanges of gifts or services risk social marginalization. Yet with no social security<sup>(19, 28)</sup> and without exchange relations, there is no social recognition.

Our study also revealed that unmarried people were more likely to be indigents. As marriage in Africa marks the transition to adulthood, single persons are not recognized as adults able to assume responsibilities.<sup>(27)</sup> Marriage confers status and dignity,<sup>(29)</sup> providing individuals with a sense of meaning and of obligation to others, while



1  
2  
3 inhibiting risky behaviours and encouraging healthy ones.<sup>(30)</sup> Previous studies have  
4 reported that single, divorced, or bereaved persons showed higher mortality and  
5 morbidity in specific diseases,<sup>(31-33)</sup> as well as lower quality of life<sup>(34)</sup> compared with  
6 those who were married or cohabiting. The differences between married and unmarried  
7 people may reflect not only a causal effect of marriage but also a selection effect:  
8 healthier people may be more likely than others to find mates and marry.<sup>(35)</sup>  
9

10  
11  
12  
13  
14 Widows across the globe share two common experiences: loss of social status and  
15 reduced economic circumstances.<sup>(36)</sup> In developed countries, widowhood is experienced  
16 primarily by elderly women, while in developing countries it also affects younger  
17 women, many of whom are still rearing children. Widowers, even when elderly, are far  
18 more likely to remarry,<sup>(37)</sup> but this is not the case for widows, who, if they do remarry,  
19 rarely do so of their own free will. As a result, many women spend a long period of their  
20 lives in widowhood, with all its associated disadvantages and stigmas.<sup>(36)</sup> In a recent  
21 study, Lloyd-Sherlock et al. found that the association between widowhood and being in  
22 the poorest household wealth quintile was consistent across most countries (China,  
23 Ghana, India, the Russian Federation, and South Africa).<sup>(37)</sup> In Burkina Faso, the  
24 sociocultural context is still marked by beliefs and practices leading to discrimination  
25 against women, particularly older women, including widow inheritance, forced  
26 marriage, and social exclusion of women for witchcraft allegations. Belief in witchcraft is  
27 more dominant in rural areas, where poverty usually leads to strained human and in-  
28 law relations, and where most illnesses cannot be explained.<sup>(38)</sup> Women victims of such  
29 violence and discrimination are mostly seniors, have had no children or only girls, have  
30 emigrated, or their children have not "succeeded". They are widowed or  
31 postmenopausal, poor, and uneducated.<sup>(39)</sup> In our study, women who were indigents  
32 were likely to carry health consequences of their reproductive history. After surviving  
33 adolescent childbirth and multiparity, they were at high risk of lower physical  
34 performance,<sup>(40)</sup> chronic diseases, incontinence <sup>(41)</sup>, or fistula.<sup>(42)</sup> Supporting this line of  
35 evidence, Doulogou et al.<sup>(33)</sup> reported that widows in Burkina Faso were more  
36 vulnerable to hypertension than were married women of similar age, education, and  
37 health behaviours.  
38  
39  
40  
41  
42  
43  
44  
45  
46  
47  
48  
49  
50  
51  
52  
53  
54  
55  
56  
57  
58  
59  
60

1  
2  
3 The classification tree showed that even married women, if aged 60 years and over,  
4 were more likely to be indigents. Power inequalities in gender relationships, affecting  
5 access to resources and decision-making on sexual and reproductive issues, are frequent  
6 in West African societies.<sup>(43)</sup> Harmful cultural practices, such as widow cleansing, son  
7 preference, and others, remain threats to women's health and well-being.<sup>(44)</sup> Onadja et  
8 al.<sup>(45)</sup> reported that being a woman was positively associated with higher odds of  
9 cognitive impairment and mobility disability in Burkina Faso, and the size of  
10 associations appeared insensitive to adjustment for various life-course socioeconomic  
11 and health conditions. Females make up an increasing proportion of the world's poor.<sup>(46)</sup>  
12 This situation is exacerbated by age and marital status, as shown in this research.

13  
14 In the present study, we considered CBT as a base-case standard for the classification of  
15 indigents and non-indigents. According to Conning and Kenave<sup>(47)</sup>, CBT may lead to  
16 increased conflict and division within the community and places high time costs on  
17 community leaders. Program goals may be subverted to serve elite interests, or local  
18 targeting preferences might differ substantially from national or donor preferences.  
19 However, the social acceptability, validity, and effectiveness of the CBT process have  
20 been documented in Burkina Faso.<sup>(48-50)</sup> Schleicher et al.<sup>(11)</sup>, who compared  
21 decentralized versus statistical targeting of anti-poverty programs, found that in the  
22 sub-Saharan African context community-based targeting is far more cost-effective than  
23 any statistical targeting procedure for welfare program benefits.

24  
25 Potential limitations of this study include the fact that the results may not be  
26 representative of all of Burkina Faso because the study targeted only certain rural areas.  
27 Moreover, self-reported health included in this study may say more about people's  
28 health awareness, health expectations, and overall life satisfaction than about their  
29 actual health, especially in a poor population with little engagement with services.

### 26 27 **Policy implications**

28  
29 The way the State is organized often exacerbates existing social cleavages, intensifying  
30 inequalities between rich and poor. For many vulnerable groups, such as older adults,  
31 unmarried adults, and widowed women, changes over the past decade have eroded  
32 important social safety networks and practices. Targeting the poorest for free access to  
33 health care or financial assistance has emerged as an alternative to UHC in many low-  
34

1  
2  
3 and middle-income countries. Such targeting requires effective selection strategies. Our  
4 results showed that, as identified by the community, the indigent population in some  
5 rural areas in Burkina Faso is comprised of three groups: widow(er)s under 45,  
6 unmarried people aged 45 years and over, and married women aged 60 years and over.  
7  
8 Using the country's 2014 Demographic Health Survey data, we selected and described  
9 these groups and found they represented 1% of the total population under age 45, 23%  
10 of those aged 45 and over, and 45% of people aged 60 and over. Given scarce resources  
11 in Burkina Faso, a budget impact analysis is needed to estimate the financial  
12 consequences of extending access to free health care services to other sub-groups of  
13 populations. The government's ability and willingness to support and sustain these  
14 programs must be assessed. These analyses should also explore the trade-offs between  
15 sensitivity and specificity in the classification of indigents and non-indigents and  
16 investigate the consequences of including these groups.  
17  
18

19  
20 In moving toward UHC, the government of Burkina Faso has implemented, since April 2,  
21 2016, free access to maternal and child health care. However, as reported here, there are  
22 other vulnerable groups with poor health and limited access to health services. Health  
23 care in Burkina Faso should include high-priority services to unmarried people under 45  
24 and those aged 45 years and over (as in Senegal, where elderly people have free access  
25 to health care),<sup>(51)</sup> particularly widow(er)s and older women, and services should be  
26 adapted to their health needs, including chronic diseases. Extending free access to health  
27 care services to these vulnerable populations living in rural areas may be a pertinent  
28 public health intervention.  
29  
30  
31  
32  
33  
34  
35  
36  
37  
38  
39  
40  
41  
42

### 43 **Conclusion**

44 Using an original study method, this research sheds light on indigence by presenting the  
45 characteristics of indigents as perceived by their own communities. Indigence is rare  
46 among the married population under 45 and frequent among unmarried adults and  
47 older adults, particularly widows(er)s and older women. Indigent people reported  
48 poorer health, chronic disease, and limitations in physical functioning. This implies that  
49 free priority health care services for indigent people must take into account age and  
50 gender, as well as the management of chronic conditions.  
51  
52  
53  
54  
55  
56  
57  
58  
59  
60

### **AUTHORS' CONTRIBUTIONS**

Samiratou Ouédraogo performed the statistical analysis, interpreted the results, reviewed the literature, and prepared the manuscript.

Valéry Ridde was involved in conception of the study design, data collection, statistical analysis, interpretation of results, literature review, and manuscript preparation.

Nicole Atchessi, Aurélia Souares, Jean-Louis Kouliadiati, and Quentin Stoeffler participated in conception of the study design, data collection, and manuscript preparation.

Maria-Victoria Zunzunegui was involved in conception of the study design, statistical analysis, interpretation of results, literature review, and manuscript preparation.

All authors read and approved the final manuscript.

**FUNDING STATEMENT**

The “African Region Multi-Donor Trust Fund on Poverty and Social Impact Analysis (PSIA)” funded data collection for this study. The World Bank and the Canadian Institutes of Health Research (CIHR), through the project “Community research studies and interventions for health equity in Burkina Faso” (Grant number ROH-115213), funded statistical analysis, interpretation, and manuscript preparation. Valéry Ridde holds a CIHR-funded Research Chair in Applied Public Health (CPP 137901). The University of Montreal Public Health Research Institute supported the costs related to editing of the present manuscript.

The funding bodies did not play any role in the study design, analysis, interpretation of data, writing of the manuscript, or decision to submit it for publication.

## ACKNOWLEDGEMENTS

We thank Anne-Marie Turcotte-Tremblay for assistance in the editing of the manuscript.

We thank Yamba Kafando, Jake Robin, Haidara Ousmane Diadie, and Philippe Compaoré for their assistance during the study.

We thank the research NGO “AGIR” and its staff for conducting the interviews.

We thank “SERSAP” for coordinating the selection of indigents by the communities.

We thank the Demographic and Health Surveys (DHS) Program for providing Burkina Faso’s 2014 DHS data.

1  
2  
3  
4  
5  
6  
7  
8  
9  
10  
11  
12  
13  
14  
15  
16  
17  
18  
19  
20  
21  
22  
23  
24  
25  
26  
27  
28  
29  
30  
31  
32  
33  
34  
35  
36  
37  
38  
39  
40  
41  
42  
43  
44  
45  
46  
47  
48  
49  
50  
51  
52  
53  
54  
55  
56  
57  
58  
59  
60

**COMPETING INTERESTS**

The authors declare that they have no conflicts of interest.

For peer review only

## TABLES

**Table 1: Total population in each village and number of non-indigents and indigents**

| <b>Villages</b>                                  | <b>Total population in 2011</b> | <b>Non-indigents</b> | <b>Indigents</b> |
|--------------------------------------------------|---------------------------------|----------------------|------------------|
| <b>District of Gourcy (North region)</b>         |                                 |                      |                  |
| Bassi                                            | 3140                            | 272                  | 18               |
| Palle                                            | 1602                            | 100                  | 12               |
| Garou                                            | 627                             | 26                   | 38               |
| Doure                                            | 1297                            | 69                   | 36               |
| Kibilo                                           | 2799                            | 180                  | 19               |
| Leleguere                                        | 765                             | 50                   | 27               |
| Minima                                           | 1413                            | 82                   | 24               |
| Zankolga                                         | 546                             | 35                   | 32               |
| Ranoua                                           | 2190                            | 124                  | 27               |
| Bouloulou                                        | 2131                            | 115                  | 32               |
| Rassomde                                         | 1940                            | 99                   | 16               |
| <b>District of Diébougou (South-west region)</b> |                                 |                      |                  |
| Obro                                             | 641                             | 47                   | 38               |
| Sorindigui                                       | 534                             | 55                   | 38               |
| Bonfesso                                         | 633                             | 94                   | 28               |
| Nabere                                           | 864                             | 120                  | 35               |
| Tansie                                           | 1412                            | 88                   | 166              |
| Olbontoune                                       | 312                             | 27                   | 71               |
| Diagnon                                          | 264                             | 9                    | 30               |
| Diourao                                          | 556                             | 32                   | 53               |
| Tiakoura                                         | 216                             | 31                   | 37               |



1  
2  
3  
4  
5  
6  
7  
8  
9  
10  
11  
12  
13  
14  
15  
16  
17  
18  
19  
20  
21  
22  
23  
24  
25  
26  
27  
28  
29  
30  
31  
32  
33  
34  
35  
36  
37  
38  
39  
40  
41  
42  
43  
44  
45  
46  
47  
48  
49  
50  
51  
52  
53  
54  
55  
56  
57  
58  
59  
60

|      |     |     |    |
|------|-----|-----|----|
| Poyo | 950 | 128 | 27 |
|------|-----|-----|----|

---

For peer review only

**Table 2: Comparison of socio-economic characteristics and health status between non-indigents and indigents**

| Variables                                  | Total Number | Non-indigents |            | Indigents  |            | P value |
|--------------------------------------------|--------------|---------------|------------|------------|------------|---------|
|                                            |              | Number        | Percentage | Number     | Percentage |         |
|                                            |              | <b>1783</b>   |            | <b>829</b> |            |         |
| <b>District</b>                            |              |               |            |            |            | <0.0001 |
| Diébougou                                  | 1179         | 631           | 35.4       | 548        | 66.1       |         |
| Gourcy                                     | 1433         | 1152          | 64.6       | 281        | 33.9       |         |
| <b>Gender</b>                              |              |               |            |            |            | <0.0001 |
| Male                                       | 1057         | 802           | 45.0       | 255        | 30.8       |         |
| Female                                     | 1555         | 981           | 55.0       | 574        | 69.2       |         |
| <b>Age (years)</b>                         |              |               |            |            |            | <0.0001 |
| 18–24                                      | 368          | 364           | 20.4       | 4          | 0.5        |         |
| 25–34                                      | 555          | 524           | 29.4       | 31         | 3.7        |         |
| 35–44                                      | 457          | 328           | 18.4       | 129        | 15.6       |         |
| 45–59                                      | 658          | 333           | 18.4       | 325        | 39.2       |         |
| 60+                                        | 574          | 234           | 13.1       | 340        | 41.0       |         |
| <b>Highest level of education achieved</b> |              |               |            |            |            | <0.0001 |
| None                                       | 2312         | 1522          | 85.4       | 790        | 95.3       |         |
| Primary school                             | 213          | 188           | 10.5       | 25         | 3.0        |         |
| Secondary school                           | 87           | 73            | 4.1        | 14         | 1.7        |         |
| <b>Marital status</b>                      |              |               |            |            |            | <0.0001 |
| Single                                     | 111          | 68            | 3.8        | 43         | 5.2        |         |
| Monogamous union or living together        | 1308         | 1035          | 58.0       | 273        | 32.9       |         |
| Polygamous union                           | 715          | 562           | 31.5       | 153        | 18.5       |         |
| Divorced or separated                      | 25           | 8             | 0.4        | 17         | 2.1        |         |
| Widowed                                    | 453          | 110           | 6.2        | 343        | 41.4       |         |

|    |                                                                            |      |      |      |     |      |         |
|----|----------------------------------------------------------------------------|------|------|------|-----|------|---------|
| 1  |                                                                            |      |      |      |     |      |         |
| 2  |                                                                            |      |      |      |     |      |         |
| 3  |                                                                            |      |      |      |     |      |         |
| 4  | <b>Engaged in income-producing activity in the past 7 days</b>             |      |      |      |     |      | <0.0001 |
| 5  | No                                                                         | 2044 | 1344 | 75.4 | 700 | 84.4 |         |
| 6  | Yes                                                                        | 568  | 439  | 24.6 | 129 | 15.6 |         |
| 7  |                                                                            |      |      |      |     |      |         |
| 8  |                                                                            |      |      |      |     |      |         |
| 9  | <b>Difficulties satisfying food needs</b>                                  |      |      |      |     |      | <0.0001 |
| 10 | No                                                                         | 1608 | 1219 | 68.4 | 389 | 46.9 |         |
| 11 | Yes                                                                        | 1004 | 564  | 31.6 | 440 | 53.1 |         |
| 12 |                                                                            |      |      |      |     |      |         |
| 13 |                                                                            |      |      |      |     |      |         |
| 14 |                                                                            |      |      |      |     |      |         |
| 15 | <b>Financial difficulties that prevent buying foodstuffs</b>               |      |      |      |     |      | <0.0001 |
| 16 | No                                                                         | 1561 | 1210 | 67.9 | 351 | 42.3 |         |
| 17 | Yes                                                                        | 1051 | 573  | 32.1 | 478 | 57.7 |         |
| 18 |                                                                            |      |      |      |     |      |         |
| 19 |                                                                            |      |      |      |     |      |         |
| 20 | <b>Financial difficulties that prevent going to the health care centre</b> |      |      |      |     |      | <0.0001 |
| 21 | No                                                                         | 1553 | 1250 | 70.1 | 303 | 36.6 |         |
| 22 | Yes                                                                        | 1059 | 533  | 29.9 | 526 | 63.4 |         |
| 23 |                                                                            |      |      |      |     |      |         |
| 24 |                                                                            |      |      |      |     |      |         |
| 25 |                                                                            |      |      |      |     |      |         |
| 26 | <b>Financial difficulties that prevent buying medicines</b>                |      |      |      |     |      | <0.0001 |
| 27 | No                                                                         | 1610 | 1280 | 71.8 | 330 | 39.8 |         |
| 28 | Yes                                                                        | 1002 | 503  | 28.2 | 499 | 60.2 |         |
| 29 |                                                                            |      |      |      |     |      |         |
| 30 |                                                                            |      |      |      |     |      |         |
| 31 | <b>Perceived poor health</b>                                               |      |      |      |     |      | <0.0001 |
| 32 | No                                                                         | 2206 | 1629 | 91.4 | 577 | 69.6 |         |
| 33 | Yes                                                                        | 406  | 154  | 8.6  | 252 | 30.4 |         |
| 34 |                                                                            |      |      |      |     |      |         |
| 35 |                                                                            |      |      |      |     |      |         |
| 36 |                                                                            |      |      |      |     |      |         |
| 37 | <b>Chronic disease</b>                                                     |      |      |      |     |      | <0.0001 |
| 38 | No                                                                         | 1592 | 1243 | 69.7 | 349 | 42.1 |         |
| 39 | Yes                                                                        | 1020 | 540  | 30.3 | 480 | 57.9 |         |
| 40 |                                                                            |      |      |      |     |      |         |
| 41 |                                                                            |      |      |      |     |      |         |
| 42 | <b>Disability</b>                                                          |      |      |      |     |      | <0.0001 |
| 43 | No                                                                         | 2297 | 1679 | 94.2 | 618 | 74.5 |         |
| 44 | Yes                                                                        | 315  | 104  | 5.8  | 211 | 25.5 |         |
| 45 |                                                                            |      |      |      |     |      |         |
| 46 |                                                                            |      |      |      |     |      |         |
| 47 |                                                                            |      |      |      |     |      |         |
| 48 | <b>Perceived limitations in ability to walk 400m</b>                       |      |      |      |     |      | <0.0001 |
| 49 | No                                                                         | 2366 | 1702 | 95.5 | 664 | 80.1 |         |
| 50 | Yes                                                                        | 246  | 81   | 4.5  | 165 | 19.9 |         |
| 51 |                                                                            |      |      |      |     |      |         |
| 52 |                                                                            |      |      |      |     |      |         |
| 53 | <b>Perceived limitations in upper limb strength</b>                        |      |      |      |     |      | <0.0001 |
| 54 | No                                                                         | 2282 | 1697 | 95.2 | 585 | 70.6 |         |
| 55 |                                                                            |      |      |      |     |      |         |
| 56 |                                                                            |      |      |      |     |      |         |
| 57 |                                                                            |      |      |      |     |      |         |
| 58 |                                                                            |      |      |      |     |      |         |
| 59 |                                                                            |      |      |      |     |      |         |
| 60 |                                                                            |      |      |      |     |      |         |

|    |                          |      |      |      |     |      |
|----|--------------------------|------|------|------|-----|------|
| 1  |                          |      |      |      |     |      |
| 2  |                          |      |      |      |     |      |
| 3  | Yes                      | 330  | 86   | 4.8  | 244 | 29.4 |
| 4  |                          |      |      |      |     |      |
| 5  | <b>Visual impairment</b> |      |      |      |     | 0.4  |
| 6  |                          |      |      |      |     |      |
| 7  | No                       | 2560 | 1745 | 97.9 | 815 | 98.3 |
| 8  |                          |      |      |      |     |      |
| 9  | Yes                      | 52   | 38   | 2.1  | 14  | 1.7  |
| 10 | <hr/>                    |      |      |      |     |      |

For peer review only

**Table 3: Screening performance of the test tree**

| Characteristics  | Test tree nodes      |              |                | Positive predictive value | Negative predictive value |
|------------------|----------------------|--------------|----------------|---------------------------|---------------------------|
|                  |                      | Sensitivity  | Specificity    |                           |                           |
| <b>Under 45</b>  | Red node (9)         | 0.66 (55/83) | 0.99 (610/615) | 0.92 (55/60)              | 0.96 (610/638)            |
|                  |                      | 0.64         | 0.77           |                           |                           |
| <b>45 years+</b> | Red nodes (3, 15)    | (212/332)    | (204/264)      | 0.78 (212/272)            | 0.63 (204/324)            |
|                  |                      | 0.64         | 0.93           |                           |                           |
| <b>All ages</b>  | Red nodes (3, 9, 15) | (267/415)    | (814/879)      | 0.80 (267/332)            | 0.85 (814/962)            |

Data are percentages, with numbers of patients in parentheses:

- Sensitivity in under 45 was 66% (red node) = (Total indigents in node 9) / (Total indigents in this age group; node 2) x 100.
- Specificity in all ages was 93% (red nodes) = [(Total non-indigents in node 1) - (Total non-indigents in nodes 3)] + [(Total non-indigents in node 2) - (Total non-indigents in nodes 5)] / Total non-indigents in all ages groups (nodes 1 and 2) x 100.
- Positive predictive value in all ages was 80% (red nodes 3, 9, and 15) = (Total indigents in red nodes 3, 9, and 15) / (Total non-indigent and indigents in red nodes 3, 9, and 15) x 100.
- Negative predictive value in under 45 was 98% (red and orange nodes) = [(Total non-indigents in node 2) - (Total non-indigents in nodes 5 and 11)] / [(Total indigents in node 2 - Total indigents in nodes 5 and 11) + (Total non-indigents in node 2 - Total non-indigents in nodes 5 and 11)] x 100.

**REFERENCE LIST**

1. Chan M. Making fair choices on the path to universal health coverage. *Health Systems & Reform*. 2016;2(1):5–7.
2. Nicholson D, Yates R, Warburton W, Fontana G. Delivering universal health coverage: a guide for policymakers. Report of the WISH Universal Health Coverage Forum 2015. WISH Partners, 2015 [cited 2016 May 20]. Available from: <https://www.imperial.ac.uk/media/imperial-college/institute-of-global-health-innovation/public/Universal-health-coverage.pdf>
3. Ellis F. 'We are all poor here': economic difference, social divisiveness and targeting cash transfers in Sub-Saharan Africa. *J Dev Stud*. 2012;48(2):201–14.
4. Stoeffler Q, Mills B, del Ninno C. Reaching the poor: cash transfer program targeting in Cameroon. *World Dev*. 2016;83:244–63.
5. Ridde V. "The problem of the worst-off is dealt with after all other issues": the equity and health policy implementation gap in Burkina Faso. *Soc Sci Med*. 2008;66(6):1368–78.
6. Atchessi N, Ridde V, Zunzunegui MV. Is the process for selecting indigents to receive free care in Burkina Faso equitable? *BMC Public Health*. 2014;14:1158.
7. Conning J, Kevane M. Community based targeting mechanisms for social safety nets: a critical review. *World Dev*. 2002;30:375–94.
8. Hanson K, Worrall E, Wiseman V. Targeting services towards the poor: a review of targeting mechanisms and their effectiveness. In: Bennett S, Gilson L, Mills A, editors. *Health, economic development and household poverty: from understanding to action*. London: Routledge; 2007. p. 134–54.
9. Schleicher M, Soares A, Pacere A N, Sauerborn R, Klöner S. Decentralized versus statistical targeting of anti-poverty programs: evidence from Burkina Faso. Working paper, Heidelberg 2016, 59 p. [cited 2017 30 March]. Available from: <http://archiv.ub.uni-heidelberg.de/volltextserver/22223/>
10. Ridde V, Haddad S, Nikiema B, Ouedraogo M, Kafando Y, Bicaba A. Low coverage but few inclusion errors in Burkina Faso: a community-based targeting approach to exempt the indigent from user fees. *BMC Public Health*. 2010;10:631.
11. Kadio K, Ridde V, Samb O. M. Wealth, poverty and local perceptions of poverty in Burkina Faso. 2012. [cited 2017 30 March]. Available from: [http://fr.slideshare.net/valery\\_ridde/wealth-poverty-and-local-perceptions-of-poverty-in-burkina-faso](http://fr.slideshare.net/valery_ridde/wealth-poverty-and-local-perceptions-of-poverty-in-burkina-faso)

- 1  
2  
3 12. Ridde V, Yaogo M, Kafando Y, Sanfo O, Coulibaly N, Nitiema PA, et al. A community-  
4 based targeting approach to exempt the worst-off from user fees in Burkina Faso. *J*  
5 *Epidemiol Community Health*. 2010;64(1):10-5.  
6  
7  
8 13. Ridde V, Haddad S, Nikiema B, Ouedraogo M, Kafando Y, Bicaba A. Low coverage but  
9 few inclusion errors in Burkina Faso: a community-based targeting approach to exempt  
10 the indigent from user fees. *BMC Public Health*. 2010;10:631.  
11  
12 14. Simporé L, Ridde V, Queuille L, Hema A. Évaluation de l'efficacité du ciblage  
13 communautaire des indigents bénéficiaires de la gratuité des soins dans les districts  
14 sanitaires de Dori et de Sebba au Burkina Faso. In: Fournier P, Haddad S, Ridde V, eds.  
15 *Santé maternelle et accès aux soins en Afrique de l'Ouest. Contributions de jeunes*  
16 *chercheurs*. Paris: Harmattan, 2013. p. 209–30.  
17  
18  
19 15. Atchessi N, Ridde V, Zunzunegui MV. User fees exemptions alone are not enough to  
20 increase indigent use of healthcare services. *Health Policy Plan*. 2016;31(5):674–81.  
21  
22  
23 16. Ridde V, Turcotte-Tremblay AM, Souares A, Lohmann J, Zombre D, Koulidiati JL, et al.  
24 Protocol for the process evaluation of interventions combining performance-based  
25 financing with health equity in Burkina Faso. *Implement Sci*. 2014;9:149.  
26  
27  
28 17. Ministère de la santé du Burkina Faso. *Annuaire statistique 2014*. Ouagadougou:  
29 Direction générale des études et des statistiques sectorielles; 2015.  
30  
31 18. Onadja Y, Bignami S, Rossier C, Zunzunegui MV. The components of self-rated health  
32 among adults in Ouagadougou, Burkina Faso. *Popul Health Metr*. 2013;11:15.  
33  
34 19. Badini-Kinda F. The gap between ideas and practices: elderly social insecurity in  
35 rural Burkina Faso / L'écart entre idées et pratiques : l'insécurité sociale des personnes  
36 âgées en milieu rural burkinabé. In: de Jong W, Roth C, Badini-Kinda F, Bhagyanath S,  
37 editors. *Ageing in insecurity: case studies on social security and gender in India and*  
38 *Burkina Faso / Vieillir dans l'insécurité: sécurité sociale et genre en Inde et au Burkina*  
39 *Faso: études de cas*. Piscataway, NJ: Transaction Publishers; 2005. p. 139–66, 323–51.  
40  
41  
42  
43 20. Walker JA. Early marriage in Africa-trends, harmful effects and interventions. *Afr J*  
44 *Reprod Health*. 2012;16(2):231-40.  
45  
46  
47 21. Valmy L, Gontier B, Parriault MC, Van Melle A, Pavlovsky T, Basurko C, et al.  
48 Prevalence and predictive factors for renouncing medical care in poor populations of  
49 Cayenne, French Guiana. *BMC Health Serv Res*. 2016;16:34.  
50  
51  
52 22. Rokach L, Maimon O. Top-down induction of decision trees classifiers – a survey.  
53 *IEEE Trans Syst Man Cybern*. 2002;1(11):12.  
54  
55  
56 23. Kinsella K, He W. *An aging world: 2008*. International population reports.  
57 Washington, DC: U.S. Government Printing Office; 2009. Contract No.: P95/09-1.  
58  
59  
60

1  
2  
3 24. The World Bank. Burkina Faso. 2016 [cited 2016 03 March]; Available from:  
4 <http://data.worldbank.org/country/burkina-faso>.

5  
6 25. Oizumi K, Kajiwara H, Aratame N. Facing up to the problem of population aging in  
7 developing countries: new perspectives for assistance and cooperation. Tokyo: Institute  
8 for International Cooperation, Japan International Cooperation Agency (JICA); 2006.

9  
10 26. McEniry M, McDermott J. Early-life conditions, rapid demographic changes, and older  
11 adult health in the developing world. *Biodemography Soc Biol*. 2015;61(2):147-66.

12  
13 27. Roth C. Les relations intergénérationnelles sous pression au Burkina Faso. *Autrepart:*  
14 *Vieillir au Sud*. 2010;95-110. doi: 10.3917/autr.053.0095

15  
16 28. Roth C. Threatening dependency: limits of social security. Old age and gender in  
17 urban Burkina Faso / Dépendance menaçante : limites de la sécurité sociale, vieil âge et  
18 genre en milieu urbain burkinabé. In: de Jong W, Roth C, Badini-Kinda F, Bhagyanath S,  
19 editors. *Ageing in insecurity: case studies on social security and gender in India and*  
20 *Burkina Faso / Vieillir dans l'insécurité: sécurité sociale et genre en Inde et au Burkina*  
21 *Faso: études de cas*. Piscataway, NJ: Transaction Publishers; 2005. p. 107-37, 289-322.

22  
23 29. Kyalo P. A reflection on the African traditional values of marriage and sexuality.  
24 *IJARPED*. 2012;1(2):211-219.

25  
26 30 Waite L, Gallagher M. The case for marriage: why married people are happier,  
27 healthier and better off financially. New York: Broadway Books; 2000.

28  
29 31. Joung IM, van de Mheen H, Stronks K, van Poppel FW, Mackenbach JP. Differences in  
30 self-reported morbidity by marital status and by living arrangement. *Int J Epidemiol*.  
31 1994;23(1):91-7.

32  
33 32. Hu YR, Goldman N. Mortality differentials by marital status: an international  
34 comparison. *Demography*. 1990;27(2):233-50.

35  
36 33. Doulogou B, Kouanda S, Rossier C, Soura A, Zunzunegui MV. Differences in  
37 hypertension between informal and formal areas of Ouagadougou, a sub-Saharan  
38 African city. *BMC Public Health*. 2014;14:893.

39  
40 34. Han KT, Park EC, Kim JH, Kim SJ, Park S. Is marital status associated with quality of  
41 life? *Health Qual Life Outcomes*. 2014;12:109.

42  
43 35. Bramlett MD, Mosher WD. Cohabitation, marriage, divorce, and remarriage in the  
44 United States. *Vital Health Stat* 23. 2002(22):1-93.

45  
46 36. United Nations. *Widowhood: invisible women, secluded or excluded*. New York:  
47 United Nations Division for the Advancement of Women; 2001 [cited 2016 May 20].  
48 Available from:  
49 [http://www.un.org/womenwatch/daw/public/wom\\_Dec%2001%20single%20pg.pdf](http://www.un.org/womenwatch/daw/public/wom_Dec%2001%20single%20pg.pdf)

50  
51  
52  
53  
54  
55  
56  
57  
58 28  
59  
60



- 1  
2  
3 37. Lloyd-Sherlock P, Corso B, Minicuci N. Widowhood, socio-economic status, health  
4 and wellbeing in low and middle-income countries. *J Dev Stud*. 2015;51(10):1374–88.  
5  
6 38. Meel BL. Witchcraft in Transkei Region of South African: case report. *Afr Health Sci*.  
7 2009;9(1):61–4.  
8  
9 39. Nebie-Zoma DS [Internet]. L'exclusion sociale pour allégation de sorcellerie, une  
10 violence faites aux femmes. 2014 [cited 2016 May 20]. Available from:  
11 <http://www.genreenaction.net/L-exclusion-sociale-pour-allegation-de.html>.  
12  
13 40. Câmara SMA, Pirkle C, Moreira MA, Vieira MCA, Vafaei A, Maciel ÁCC. Early maternal  
14 age and multiparity are associated to poor physical performance in middle-aged women  
15 from Northeast Brazil: a cross-sectional community based study. *BMC Womens Health*.  
16 2015;15:56.  
17  
18 41. Kepenekci I, Keskinilic B, Akinsu F, Cakir P, Elhan AH, Erkek AB, et al. Prevalence of  
19 pelvic floor disorders in the female population and the impact of age, mode of delivery,  
20 and parity. *Dis Colon Rectum*. 2011;54(1):85–94.  
21  
22 42. Maheu-Giroux M, Filippi V, Maulet N, Samadoulougou S, Castro MC, Meda N, et al.  
23 Risk factors for vaginal fistula symptoms in Sub-Saharan Africa: a pooled analysis of  
24 national household survey data. *BMC Pregnancy Childbirth*. 2016;16(1):82.  
25  
26 43. Sen G, Östlin P, George A. Unequal, unfair, ineffective and inefficient gender inequity  
27 in health: why it exists and how we can change it. Final report to the WHO Commission  
28 on Social Determinants of Health, September 2007. Geneva: World Health Organization,  
29 Women and Gender Equity Knowledge Network; 2007.  
30  
31 44. Durojaye E. 'Woman, but not human': widowhood practices and human rights  
32 violations in Nigeria. *Int J Law Policy Family*. 2013;27(2). 176–96.  
33  
34 45. Onadja Y, Atchessi N, Soura BA, Rossier C, Zunzunegui MV. Gender differences in  
35 cognitive impairment and mobility disability in old age: a cross-sectional study in  
36 Ouagadougou, Burkina Faso. *Arch Gerontol Geriatr*. 2013;57(3):311–8.  
37  
38 46. Moghadam MV. The 'feminization of poverty' and women's human rights. Paris:  
39 UNESCO, Division of Human Rights, Gender Equality and Development Section; 2005.  
40  
41 47. Conning J, Kevane M. Community-based targeting mechanisms for social safety nets.  
42 Social Protection Discussion Paper No. 102. Washington, DC: World Bank; 2001.  
43  
44 48. Savadogo G, Souarès A, Sié A, Parmar D, Bibeau G, Sauerborn R. Using a community-  
45 based definition of poverty for targeting poor households for premium subsidies in the  
46 context of a community health insurance in Burkina Faso. *BMC Public Health*.  
47 2015;15:84.  
48  
49  
50  
51  
52  
53  
54  
55  
56  
57  
58  
59  
60

1  
2  
3 49. Atchessi N, Ridde V, Zunzunegui MV. Is the process for selecting indigents to receive  
4 free care in Burkina Faso equitable? BMC Public Health. 2014;14:1158.  
5

6 50. Souares A, Savadogo G, Dong H, Parmar D, Sié A, Sauerborn R. Using community  
7 wealth ranking to identify the poor for subsidies: a case study of community-based  
8 health insurance in Nouna, Burkina Faso. Health Soc Care Community. 2010;18(4):363-  
9 8.  
10

11 51. Mbacké Leye MM, Diongue M, Faye A, Coumé M, Faye A, Tall AB, et al. Analyse du  
12 fonctionnement du plan de prise en charge gratuite des soins chez les personnes âgées «  
13 Plan Sésame » au Sénégal. Santé Publique. 2013;25:101-6.  
14  
15  
16  
17  
18  
19  
20  
21  
22  
23  
24  
25  
26  
27  
28  
29  
30  
31  
32  
33  
34  
35  
36  
37  
38  
39  
40  
41  
42  
43  
44  
45  
46  
47  
48  
49  
50  
51  
52  
53  
54  
55  
56  
57  
58  
59  
60

Figure 1: Test tree diagram



Test tree diagram

159x162mm (300 x 300 DPI)

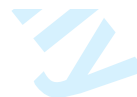

**APPENDIX 1: sensitivity analysis**

Results of the test tree, where the cost of misclassifying indigents as non-indigents was set to be twice the cost of misclassifying non-indigents as indigents. The value of alpha for splitting nodes was set at 0.05, minimum parent node size at 50, and percent node size at 25. The index value and the gains and index charts indicate the classification was good. The index value of the model was greater than 100%, the gain chart was different from the diagonal reference line, and the index chart started above 100%. The risk of misclassification was 20.9%. The overall percentage of correct classification was 83.4%, and 86.5% of indigents were accurately classified by the model.



Sensitivity analysis of the tree diagram

159x143mm (300 x 300 DPI)

Only

**STROBE Statement—Checklist of items that should be included in reports of cross-sectional studies**

|                           | <b>Item No</b> | <b>Recommendation</b>                                                                                                                    | <b>Page</b> |
|---------------------------|----------------|------------------------------------------------------------------------------------------------------------------------------------------|-------------|
| <b>Title and abstract</b> | 1              | (a) Indicate the study's design with a commonly used term in the title or the abstract                                                   | 1           |
|                           |                | (b) Provide in the abstract an informative and balanced summary of what was done and what was found                                      | 2-3         |
| <b>Introduction</b>       |                |                                                                                                                                          |             |
| Background/rationale      | 2              | Explain the scientific background and rationale for the investigation being reported                                                     | 5           |
| Objectives                | 3              | State specific objectives, including any prespecified hypotheses                                                                         | 5           |
| <b>Methods</b>            |                |                                                                                                                                          |             |
| Study design              | 4              | Present key elements of study design early in the paper                                                                                  | 6           |
| Setting                   | 5              | Describe the setting, locations, and relevant dates, including periods of recruitment, exposure, follow-up, and data collection          | 6           |
| Participants              | 6              | (a) Give the eligibility criteria, and the sources and methods of selection of participants                                              | 6           |
| Variables                 | 7              | Clearly define all outcomes, exposures, predictors, potential confounders, and effect modifiers. Give diagnostic criteria, if applicable | 7           |

|                              |     |                                                                                                                                                                                                   |               |
|------------------------------|-----|---------------------------------------------------------------------------------------------------------------------------------------------------------------------------------------------------|---------------|
| Data sources/<br>measurement | 8*  | For each variable of interest, give sources of data and details of methods of assessment (measurement). Describe comparability of assessment methods if there is more than one group              | 7             |
| Bias                         | 9   | Describe any efforts to address potential sources of bias                                                                                                                                         |               |
| Study size                   | 10  | Explain how the study size was arrived at                                                                                                                                                         | 10            |
| Quantitative variables       | 11  | Explain how quantitative variables were handled in the analyses. If applicable, describe which groupings were chosen and why                                                                      | 7             |
| Statistical methods          | 12  | (a) Describe all statistical methods, including those used to control for confounding                                                                                                             | 8-9           |
|                              |     | (b) Describe any methods used to examine subgroups and interactions                                                                                                                               | NA            |
|                              |     | (c) Explain how missing data were addressed                                                                                                                                                       |               |
|                              |     | (d) If applicable, describe analytical methods taking account of sampling strategy                                                                                                                | 8-9           |
|                              |     | (e) Describe any sensitivity analyses                                                                                                                                                             | 11 & Appendix |
| <b>Results</b>               |     |                                                                                                                                                                                                   |               |
| Participants                 | 13* | (a) Report numbers of individuals at each stage of study—eg numbers potentially eligible, examined for eligibility, confirmed eligible, included in the study, completing follow-up, and analysed | 10            |
|                              |     | (b) Give reasons for non-participation at each stage                                                                                                                                              |               |
|                              |     | (c) Consider use of a flow diagram                                                                                                                                                                |               |
| Descriptive data             | 14* | (a) Give characteristics of study participants (eg demographic, clinical, social) and information on                                                                                              | 10            |

1  
2  
3 exposures and potential confounders  
4  
5  
6 (b) Indicate number of participants with missing  
7 data for each variable of interest  
8

|                      |     |                                                                                                                                                                                                                                                                                                                                                                                                                                                                                       |       |
|----------------------|-----|---------------------------------------------------------------------------------------------------------------------------------------------------------------------------------------------------------------------------------------------------------------------------------------------------------------------------------------------------------------------------------------------------------------------------------------------------------------------------------------|-------|
| 9 Outcome data       | 15* | Report numbers of outcome events or summary<br>10 measures                                                                                                                                                                                                                                                                                                                                                                                                                            | 22    |
| 11 Main results      | 16  | (a) Give unadjusted estimates and, if applicable,<br>12 confounder-adjusted estimates and their precision<br>13 (eg, 95% confidence interval). Make clear which<br>14 confounders were adjusted for and why they were<br>15 included<br>16<br>17 (b) Report category boundaries when continuous<br>18 variables were categorized<br>19<br>20 (c) If relevant, consider translating estimates of<br>21 relative risk into absolute risk for a meaningful time<br>22 period<br>23<br>24 | NA    |
| 25 Other analyses    | 17  | Report other analyses done—eg analyses of<br>26 subgroups and interactions, and sensitivity analyses<br>27<br>28                                                                                                                                                                                                                                                                                                                                                                      | NA    |
| 29 <b>Discussion</b> |     |                                                                                                                                                                                                                                                                                                                                                                                                                                                                                       |       |
| 30 Key results       | 18  | Summarise key results with reference to study<br>31 objectives<br>32                                                                                                                                                                                                                                                                                                                                                                                                                  | 13    |
| 33 Limitations       | 19  | Discuss limitations of the study, taking into account<br>34 sources of potential bias or imprecision. Discuss<br>35 both direction and magnitude of any potential bias<br>36                                                                                                                                                                                                                                                                                                          | 14    |
| 37 Interpretation    | 20  | Give a cautious overall interpretation of results<br>38 considering objectives, limitations, multiplicity of<br>39 analyses, results from similar studies, and other<br>40 relevant evidence<br>41                                                                                                                                                                                                                                                                                    | 12-15 |
| 42 Generalisability  | 21  | Discuss the generalisability (external validity) of the<br>43 study results<br>44<br>45                                                                                                                                                                                                                                                                                                                                                                                               | 14    |

**Other information**

---

|         |    |                                                                                                                                                               |    |
|---------|----|---------------------------------------------------------------------------------------------------------------------------------------------------------------|----|
| Funding | 22 | Give the source of funding and the role of the funders for the present study and, if applicable, for the original study on which the present article is based | 17 |
|---------|----|---------------------------------------------------------------------------------------------------------------------------------------------------------------|----|

---

For peer review only
